# Supplementary material
Source: publisher figshare collection journal article supplement (https://gsajournals.figshare.com/ndownloader/files/13153061)
Supplement: Supplementary file 1 [file 13153061]

## Sheet: SP enriched P<0.01
Gene name	Wormbase ID	log2 fold enrichment SP/OO (FBF iCLIP)	Unadjusted p value	BH-corrected p value	Program (Noble et al. 2016)
snpc-1.3	WBGene00017265	4.706	1.1614e-92	3.59337e-89	Oogenic and Spermatogenic
fog-1	WBGene00001481	3.08241	3.18798e-81	7.39771e-78	Oogenic and Spermatogenic
ZK484.5	WBGene00022751	4.97277	3.4445e-79	6.39437e-76	Spermatogenic only
F58F12.2	WBGene00019062	5.29232	2.14297e-54	2.84157e-51	Spermatogenic only
msp-64	WBGene00003457	4.72259	1.30877e-47	1.34978e-44	Spermatogenic only
gska-3	WBGene00007977	5.25873	8.09337e-46	6.82934e-43	Spermatogenic only
moa-1	WBGene00020116	5.42662	5.56244e-45	4.30255e-42	Spermatogenic only
W02B12.12	WBGene00012207	5.44747	2.90842e-41	2.07661e-38	Spermatogenic only
msp-76	WBGene00003463	4.0583	1.51533e-40	1.00466e-37	Spermatogenic only
F49C12.15	WBGene00009884	4.42493	1.91888e-40	1.18741e-37	Spermatogenic only
ZK973.8	WBGene00022834	4.99192	6.07414e-40	3.52376e-37	Oogenic and Spermatogenic
gipc-1	WBGene00016440	4.90144	8.18209e-40	4.46742e-37	Spermatogenic only
W03D8.9	WBGene00020990	5.00092	6.36611e-37	3.11001e-34	Spermatogenic only
F32B5.4	WBGene00017978	4.49761	1.60347e-36	7.44171e-34	Spermatogenic only
ssq-2	WBGene00006051	4.1328	1.18064e-35	4.76466e-33	Spermatogenic only
F17E9.5	WBGene00017542	4.92931	9.17335e-33	3.27489e-30	Spermatogenic only
R09E10.6	WBGene00011176	4.37281	9.93221e-33	3.41447e-30	Spermatogenic only
C04G2.9	WBGene00007308	5.69182	9.69402e-32	2.99933e-29	Spermatogenic only
ssq-4	WBGene00006053	5.03945	4.93127e-31	1.43038e-28	Spermatogenic only
gipc-2	WBGene00009681	4.30182	5.52687e-31	1.55456e-28	Spermatogenic only
F32A11.3	WBGene00009308	4.51133	9.46586e-31	2.58418e-28	Oogenic and Spermatogenic
Y69E1A.2	WBGene00013474	4.82197	2.0657e-30	5.32607e-28	Spermatogenic only
F21F3.3	WBGene00017673	5.95162	2.97e-30	7.45068e-28	Spermatogenic only
spe-15	WBGene00004969	3.38699	1.05519e-29	2.57744e-27	Oogenic and Spermatogenic
T10E9.4	WBGene00020414	5.30937	1.93841e-29	4.38836e-27	Oogenic and Spermatogenic
F42G4.2	WBGene00009641	5.77245	2.04955e-29	4.5295e-27	Oogenic and Spermatogenic
glo-4	WBGene00017195	2.81751	2.5389e-29	5.48047e-27	Oogenic and Spermatogenic
ZK550.5	WBGene00013999	4.68251	5.39451e-29	1.138e-26	Spermatogenic only
C09H10.9	WBGene00007503	5.83419	7.20649e-29	1.48646e-26	Spermatogenic only
C17F3.1	WBGene00015907	5.66979	8.48682e-29	1.67606e-26	Spermatogenic only
ssq-1	WBGene00006050	4.73624	2.16761e-28	4.10608e-26	Oogenic and Spermatogenic
W03F11.4	WBGene00021007	5.54513	2.61475e-28	4.85403e-26	Spermatogenic only
msp-59	WBGene00003452	4.05315	4.05124e-28	7.37326e-26	Oogenic and Spermatogenic
Y69A2AR.32	WBGene00022101	2.11254	1.49671e-27	2.67163e-25	Oogenic and Spermatogenic
R11F4.1	WBGene00020007	2.68509	2.02751e-27	3.55082e-25	Spermatogenic only
nspd-1	WBGene00022754	4.15472	2.33731e-27	4.01758e-25	Oogenic and Spermatogenic
F47D12.7	WBGene00018563	4.98902	4.48101e-26	7.17117e-24	Spermatogenic only
catp-4	WBGene00007248	5.12412	7.50729e-26	1.18106e-23	Spermatogenic only
F13D12.9	WBGene00008743	4.35412	3.11614e-25	4.74163e-23	Spermatogenic only
F27C8.5	WBGene00009185	6.08646	4.17923e-25	6.1574e-23	Spermatogenic only
Y38C1AA.7	WBGene00021398	4.44825	7.79534e-25	1.13057e-22	Spermatogenic only
msd-4	WBGene00016447	4.7162	9.76614e-25	1.37347e-22	Spermatogenic only
Y69A2AR.19	WBGene00022090	5.40154	1.09321e-24	1.51451e-22	Spermatogenic only
T05F1.5	WBGene00011491	4.98513	3.41395e-24	4.5269e-22	Spermatogenic only
ssp-16	WBGene00006044	5.65708	5.63203e-24	7.26062e-22	Spermatogenic only
C34C12.4	WBGene00007923	2.05019	7.45635e-24	9.35268e-22	Oogenic and Spermatogenic
Y38E10A.17	WBGene00012595	4.64755	1.13184e-23	1.38234e-21	Spermatogenic only
F27C1.1	WBGene00017851	3.97854	3.60874e-23	4.35018e-21	Spermatogenic only
snf-5	WBGene00004904	4.85252	4.52178e-23	5.38092e-21	Spermatogenic only
nspd-2	WBGene00010633	4.6367	1.68177e-22	1.97597e-20	Oogenic and Spermatogenic
D1081.12	WBGene00086554	5.19847	1.91981e-22	2.19996e-20	Spermatogenic only
C56G2.5	WBGene00016980	3.31413	1.97836e-22	2.21243e-20	Oogenic and Spermatogenic
F52F12.5	WBGene00009938	6.13657	1.97807e-22	2.21243e-20	Spermatogenic only
Y38H8A.3	WBGene00012637	5.39612	2.52615e-22	2.7914e-20	Spermatogenic only
C44B9.2	WBGene00008079	4.84046	3.21927e-22	3.43463e-20	Spermatogenic only
Y92H12A.2	WBGene00022358	2.71198	5.45535e-22	5.6895e-20	Oogenic and Spermatogenic
C35E7.10	WBGene00016462	5.22359	5.5882e-22	5.7633e-20	Spermatogenic only
B0218.7	WBGene00015051	5.19017	7.9237e-22	8.08217e-20	Spermatogenic only
Y113G7C.1	WBGene00013771	5.27468	2.24714e-21	2.24279e-19	Spermatogenic only
K06A5.2	WBGene00019430	4.73859	2.41227e-21	2.38198e-19	Spermatogenic only
pitr-5	WBGene00017312	5.32481	4.36985e-21	4.26957e-19	Oogenic and Spermatogenic
R12C12.1	WBGene00020022	1.81658	8.37771e-21	8.01669e-19	Spermatogenic only
F07A5.2	WBGene00008541	5.21976	1.80547e-20	1.67583e-18	Spermatogenic only
T16A9.5	WBGene00011795	5.13839	3.61777e-20	3.32477e-18	Spermatogenic only
ZC434.8	WBGene00013894	2.26728	3.78987e-20	3.44878e-18	Oogenic and Spermatogenic
F08H9.2	WBGene00008590	4.09411	3.98152e-20	3.588e-18	Spermatogenic only
K04G2.4	WBGene00010563	5.50759	4.53603e-20	4.04841e-18	Spermatogenic only
ant-1.4	WBGene00020140	6.85506	5.19345e-20	4.59101e-18	Spermatogenic only
rmd-3	WBGene00007190	4.56426	7.55296e-20	6.61383e-18	Spermatogenic only
msp-81	WBGene00003467	4.85239	1.06853e-19	9.26925e-18	Spermatogenic only
R10E9.2	WBGene00011214	4.73434	2.06179e-19	1.772e-17	Spermatogenic only
F58E6.5	WBGene00010254	5.73177	3.06229e-19	2.60772e-17	Spermatogenic only
fer-1	WBGene00001414	5.31456	3.81923e-19	3.16518e-17	Oogenic and Spermatogenic
E03H12.5	WBGene00017112	5.65357	3.87048e-19	3.17928e-17	Spermatogenic only
F53B6.4	WBGene00009959	4.26016	4.1679e-19	3.39355e-17	Spermatogenic only
C34D4.3	WBGene00016399	4.63233	4.43011e-19	3.57568e-17	Oogenic and Spermatogenic
T27A3.4	WBGene00020840	4.7333	9.99383e-19	7.92844e-17	Spermatogenic only
K07H8.9	WBGene00019509	1.87105	1.1817e-18	9.29537e-17	Oogenic and Spermatogenic
T23B3.5	WBGene00020713	5.2011	1.71593e-18	1.33842e-16	Spermatogenic only
ant-1.3	WBGene00010485	5.25318	3.70332e-18	2.81756e-16	Spermatogenic only
spe-41	WBGene00004976	3.03716	4.73556e-18	3.57362e-16	Oogenic and Spermatogenic
kel-10	WBGene00002186	4.73369	6.05295e-18	4.53093e-16	Spermatogenic only
ssp-10	WBGene00006039	5.16723	6.2423e-18	4.63529e-16	Spermatogenic only
C33F10.1	WBGene00016351	5.50459	6.41388e-18	4.72489e-16	Spermatogenic only
F01D5.8	WBGene00008498	4.51237	9.11192e-18	6.65959e-16	Spermatogenic only
R05D3.3	WBGene00019878	2.24827	9.87685e-18	7.16226e-16	Spermatogenic only
crh-2	WBGene00016162	1.29475	1.33903e-17	9.48768e-16	Oogenic only
C06C3.10	WBGene00044169	6.3653	2.91568e-17	2.00469e-15	Spermatogenic only
spe-4	WBGene00004958	4.82919	3.27674e-17	2.23637e-15	Spermatogenic only
C09D4.3	WBGene00015634	6.37539	3.50048e-17	2.37164e-15	Spermatogenic only
R06B10.1	WBGene00019912	4.6546	3.57184e-17	2.40245e-15	Spermatogenic only
F58A6.9	WBGene00019026	5.38572	4.57261e-17	3.05345e-15	Spermatogenic only
nspd-7	WBGene00012781	5.30437	8.63606e-17	5.6851e-15	Spermatogenic only
F32H2.7	WBGene00009344	4.96355	1.18894e-16	7.77166e-15	Spermatogenic only
sams-5	WBGene00006416	5.27365	1.69847e-16	1.07981e-14	Oogenic and Spermatogenic
C04F12.7	WBGene00007301	4.1246	1.7545e-16	1.10784e-14	Spermatogenic only
glct-6	WBGene00019546	3.7067	2.82655e-16	1.7727e-14	Oogenic and Spermatogenic
C10G11.8	WBGene00015688	4.94457	3.01118e-16	1.87582e-14	Spermatogenic only
msp-40	WBGene00003435	6.16778	3.10061e-16	1.91866e-14	Oogenic and Spermatogenic
smz-1	WBGene00007733	5.2582	3.25814e-16	2.00278e-14	Spermatogenic only
gsp-3	WBGene00021113	5.65125	4.29377e-16	2.58797e-14	Spermatogenic only
C18E9.8	WBGene00007688	5.62077	4.56283e-16	2.7324e-14	Spermatogenic only
T14G10.8	WBGene00011777	3.73305	5.97628e-16	3.53324e-14	Oogenic and Spermatogenic
C17H12.12	WBGene00015937	3.75344	8.36585e-16	4.85324e-14	Spermatogenic only
C39H7.1	WBGene00016541	4.89466	1.11108e-15	6.40563e-14	Spermatogenic only
T08B6.4	WBGene00020353	4.628	1.16919e-15	6.69902e-14	Spermatogenic only
C15C6.2	WBGene00007601	4.85729	1.20573e-15	6.86601e-14	Oogenic and Spermatogenic
C35A11.2	WBGene00016429	7.6598	1.51818e-15	8.48902e-14	Spermatogenic only
ssq-3	WBGene00006052	4.11313	1.58897e-15	8.83164e-14	Spermatogenic only
sss-1	WBGene00006056	4.39386	1.73363e-15	9.57833e-14	Spermatogenic only
irld-1	WBGene00044529	4.06708	1.764e-15	9.68843e-14	Spermatogenic only
T27A3.5	WBGene00020841	5.12791	1.81772e-15	9.92473e-14	Spermatogenic only
Y26E6A.3	WBGene00012514	2.48286	2.22854e-15	1.20966e-13	Oogenic and Spermatogenic
B0205.10	WBGene00015024	5.57194	2.37052e-15	1.27926e-13	Spermatogenic only
nhx-8	WBGene00003735	2.22469	2.39243e-15	1.28361e-13	Oogenic and Spermatogenic
K08C9.2	WBGene00010651	4.0244	2.6735e-15	1.41802e-13	Spermatogenic only
K08F4.5	WBGene00010679	5.48278	3.05253e-15	1.60986e-13	Spermatogenic only
msp-31	WBGene00003429	5.08738	3.10357e-15	1.62753e-13	Spermatogenic only
Y69E1A.1	WBGene00013473	5.93782	3.47354e-15	1.80119e-13	Spermatogenic only
C05B5.2	WBGene00007320	5.43459	3.65375e-15	1.87395e-13	Spermatogenic only
T27E7.1	WBGene00012087	4.15881	3.65422e-15	1.87395e-13	Spermatogenic only
F37A4.4	WBGene00018134	5.92385	4.03288e-15	2.04553e-13	Spermatogenic only
R07E5.15	WBGene00011120	5.14298	4.54389e-15	2.29219e-13	Spermatogenic only
C04G2.3	WBGene00014665	5.46798	4.85356e-15	2.43517e-13	Spermatogenic only
msp-50	WBGene00003443	4.75068	4.92266e-15	2.45657e-13	Oogenic and Spermatogenic
C50C3.2	WBGene00016800	4.81	4.96379e-15	2.46384e-13	Spermatogenic only
F40G12.10	WBGene00009605	5.50283	5.29726e-15	2.61538e-13	Spermatogenic only
msp-152	WBGene00003470	5.40095	5.88501e-15	2.87498e-13	Oogenic and Spermatogenic
C35E7.9	WBGene00016461	4.17588	5.93683e-15	2.88511e-13	Spermatogenic only
abt-1	WBGene00000019	4.18491	6.0499e-15	2.92475e-13	Spermatogenic only
D1086.17	WBGene00045355	5.89691	6.677e-15	3.21119e-13	Spermatogenic only
C10G11.9	WBGene00015689	5.48961	7.39972e-15	3.52227e-13	Spermatogenic only
Y59E9AL.2	WBGene00043743	5.44735	7.59307e-15	3.57761e-13	Spermatogenic only
msp-77	WBGene00003464	4.62397	7.56366e-15	3.57761e-13	Spermatogenic only
K09F6.3	WBGene00019586	5.05423	8.91581e-15	4.15862e-13	Spermatogenic only
spe-11	WBGene00004965	4.45981	1.38556e-14	6.33533e-13	Spermatogenic only
ZK938.1	WBGene00014158	4.43695	1.37954e-14	6.33533e-13	Spermatogenic only
Y59E9AL.6	WBGene00021996	5.01912	1.75701e-14	7.95539e-13	Spermatogenic only
Y43F8A.2	WBGene00012809	4.24412	2.02958e-14	9.09365e-13	Spermatogenic only
acs-18	WBGene00011173	4.6929	2.03779e-14	9.09365e-13	Spermatogenic only
R105.1	WBGene00020084	5.84699	2.52081e-14	1.11953e-12	Spermatogenic only
hcp-2	WBGene00001830	1.17189	3.88623e-14	1.71771e-12	Oogenic and Spermatogenic
T05A7.6	WBGene00020223	4.64415	4.67267e-14	2.05553e-12	Spermatogenic only
sss-2	WBGene00006057	4.5966	5.10292e-14	2.23421e-12	Spermatogenic only
H05L14.1	WBGene00010366	4.86976	5.28345e-14	2.30239e-12	Spermatogenic only
K04H4.5	WBGene00010574	5.74379	5.9914e-14	2.5987e-12	Spermatogenic only
ncr-2	WBGene00003562	4.44488	6.02022e-14	2.59905e-12	Spermatogenic only
msp-3	WBGene00003424	5.302	6.35876e-14	2.71991e-12	Spermatogenic only
F46A9.1	WBGene00009754	5.69816	6.48022e-14	2.75915e-12	Spermatogenic only
clec-73	WBGene00021579	5.2678	6.59099e-14	2.7935e-12	Spermatogenic only
C14C10.1	WBGene00007584	3.75597	7.10366e-14	2.98354e-12	Oogenic and Spermatogenic
F55H12.5	WBGene00010136	4.85159	7.08249e-14	2.98354e-12	Oogenic and Spermatogenic
T23G11.1	WBGene00011968	5.6866	7.22239e-14	3.01974e-12	Spermatogenic only
msp-36	WBGene00003432	4.16569	7.56227e-14	3.14767e-12	Spermatogenic only
nspa-8	WBGene00012294	4.8653	9.1513e-14	3.74195e-12	Spermatogenic only
C38C3.3	WBGene00016512	4.04736	1.10633e-13	4.50392e-12	Spermatogenic only
mboa-4	WBGene00007446	4.31364	1.14791e-13	4.65278e-12	Spermatogenic only
F21H7.5	WBGene00009031	4.36239	1.28676e-13	5.17044e-12	Spermatogenic only
msp-49	WBGene00003442	3.38242	1.40945e-13	5.6148e-12	Oogenic and Spermatogenic
ZK354.2	WBGene00022705	3.9581	1.44914e-13	5.74827e-12	Spermatogenic only
msp-142	WBGene00003469	4.78528	1.57743e-13	6.20413e-12	Spermatogenic only
ZK622.1	WBGene00022780	5.67967	1.62156e-13	6.35075e-12	Spermatogenic only
tbx-34	WBGene00006553	5.58324	1.64368e-13	6.41036e-12	Spermatogenic only
cyn-2	WBGene00000878	4.09876	1.79165e-13	6.90045e-12	Spermatogenic only
smz-2	WBGene00020661	3.81047	1.87315e-13	7.18452e-12	Spermatogenic only
cyc-2.2	WBGene00013854	5.17335	2.07737e-13	7.93504e-12	Spermatogenic only
C33F10.11	WBGene00016357	4.54273	2.31472e-13	8.80542e-12	Oogenic and Spermatogenic
Y106G6H.13	WBGene00013723	4.80559	2.34551e-13	8.88613e-12	Spermatogenic only
C17H12.3	WBGene00015929	5.17992	2.46561e-13	9.30316e-12	Spermatogenic only
acdh-5	WBGene00016491	5.64176	2.48332e-13	9.33204e-12	Spermatogenic only
Y54F10BM.3	WBGene00021858	2.83137	2.61202e-13	9.77611e-12	Spermatogenic only
spe-44	WBGene00007732	1.83106	3.27385e-13	1.21067e-11	Oogenic and Spermatogenic
nspd-3	WBGene00016058	5.06929	3.81125e-13	1.40381e-11	Spermatogenic only
nhr-23	WBGene00003622	1.06679	3.8665e-13	1.41853e-11	Oogenic and Spermatogenic
Y69A2AR.8	WBGene00022079	5.08326	4.29755e-13	1.56431e-11	Spermatogenic only
F07F6.1	WBGene00017215	4.74038	4.84533e-13	1.75681e-11	Spermatogenic only
acs-10	WBGene00007082	5.10323	4.89822e-13	1.76908e-11	Spermatogenic only
C01G12.9	WBGene00007249	5.67832	4.96193e-13	1.77825e-11	Spermatogenic only
clec-79	WBGene00018548	5.05346	5.06806e-13	1.8093e-11	Spermatogenic only
msp-33	WBGene00003431	5.05777	5.57819e-13	1.98378e-11	Spermatogenic only
cpb-2	WBGene00000771	5.07375	6.87844e-13	2.42759e-11	Spermatogenic only
acdh-8	WBGene00019406	6.94257	6.95628e-13	2.44576e-11	Spermatogenic only
ssp-11	WBGene00006040	4.47328	7.05751e-13	2.47199e-11	Spermatogenic only
T25B9.6	WBGene00012012	6.06257	7.34107e-13	2.56165e-11	Spermatogenic only
F34D10.8	WBGene00009377	3.99205	7.84802e-13	2.72829e-11	Spermatogenic only
Y37E11B.10	WBGene00021381	5.03782	9.59088e-13	3.32174e-11	Spermatogenic only
Y57G7A.6	WBGene00021969	4.38674	1.1308e-12	3.87311e-11	Spermatogenic only
osta-1	WBGene00015287	6.09945	1.25521e-12	4.28339e-11	Spermatogenic only
spe-46	WBGene00012296	5.51722	1.36403e-12	4.63771e-11	Spermatogenic only
apm-1	WBGene00000150	2.16331	1.68909e-12	5.70113e-11	Oogenic and Spermatogenic
F36A2.10	WBGene00009457	4.97993	1.96852e-12	6.62022e-11	Spermatogenic only
msp-56	WBGene00003449	4.94082	2.27145e-12	7.61142e-11	Spermatogenic only
C33F10.12	WBGene00016358	4.65013	2.82108e-12	9.35187e-11	Oogenic and Spermatogenic
ttr-9	WBGene00007888	5.90686	3.78667e-12	1.22895e-10	Spermatogenic only
F32B4.2	WBGene00009313	4.90575	3.96812e-12	1.27889e-10	Spermatogenic only
clec-151	WBGene00008659	4.33573	4.55152e-12	1.46184e-10	Spermatogenic only
D2092.1	WBGene00017063	2.77764	4.62677e-12	1.48089e-10	Spermatogenic only
Y54G2A.26	WBGene00021890	1.12261	4.93474e-12	1.56864e-10	Oogenic and Spermatogenic
K10D2.8	WBGene00189952	3.29762	4.92009e-12	1.56864e-10	Spermatogenic only
nspd-5	WBGene00017386	4.90735	5.27841e-12	1.67216e-10	Spermatogenic only
msp-38	WBGene00003434	4.2732	5.84941e-12	1.84048e-10	Spermatogenic only
irld-3	WBGene00017175	6.69059	7.09959e-12	2.2263e-10	Oogenic and Spermatogenic
C28A5.6	WBGene00007791	4.62932	7.59455e-12	2.37349e-10	Spermatogenic only
osta-2	WBGene00015942	2.11769	7.72373e-12	2.40576e-10	Oogenic and Spermatogenic
cpb-1	WBGene00000770	1.28474	7.76029e-12	2.40906e-10	Oogenic and Spermatogenic
C28D4.7	WBGene00007794	5.28293	7.81267e-12	2.41724e-10	Spermatogenic only
K02F6.3	WBGene00019337	4.55357	7.99601e-12	2.46574e-10	Spermatogenic only
nspd-6	WBGene00043147	4.28355	8.20983e-12	2.5233e-10	Spermatogenic only
T02E1.7	WBGene00011379	5.80109	8.50625e-12	2.58869e-10	Spermatogenic only
tag-335	WBGene00016583	1.22134	8.50551e-12	2.58869e-10	Oogenic only
F13A7.1	WBGene00008724	4.85701	8.82452e-12	2.67677e-10	Spermatogenic only
swt-1	WBGene00019300	2.47046	9.47663e-12	2.85504e-10	Spermatogenic only
Y38F1A.1	WBGene00012605	4.08927	1.15244e-11	3.41754e-10	Spermatogenic only
Y106G6D.3	WBGene00013700	5.20895	1.33091e-11	3.90935e-10	Spermatogenic only
elo-7	WBGene00001245	5.80662	1.34356e-11	3.93405e-10	Spermatogenic only
K11C4.1	WBGene00019642	4.50282	1.36677e-11	3.98942e-10	Spermatogenic only
F20H11.4	WBGene00017647	4.20847	1.40656e-11	4.0927e-10	Spermatogenic only
B0393.4	WBGene00007169	8.12058	1.64757e-11	4.7641e-10	Spermatogenic only
C06A8.6	WBGene00015516	4.2516	1.95267e-11	5.59403e-10	Oogenic and Spermatogenic
F32B6.4	WBGene00009321	4.79356	2.01315e-11	5.74955e-10	Spermatogenic only
ZK512.8	WBGene00013987	4.19349	2.0309e-11	5.78246e-10	Spermatogenic only
ZK265.3	WBGene00013956	5.75851	2.21556e-11	6.2771e-10	Spermatogenic only
cdr-4	WBGene00010470	2.46452	2.21815e-11	6.2771e-10	Oogenic and Spermatogenic
acs-6	WBGene00022849	4.47971	2.28292e-11	6.44075e-10	Spermatogenic only
clec-123	WBGene00021288	4.41198	2.38381e-11	6.705e-10	Spermatogenic only
ZK858.2	WBGene00014116	4.79351	2.54761e-11	7.12257e-10	Spermatogenic only
C27A7.5	WBGene00007756	1.81034	2.72132e-11	7.56266e-10	Oogenic and Spermatogenic
abt-5	WBGene00000023	4.13884	2.98206e-11	8.26254e-10	Spermatogenic only
C36H8.1	WBGene00007987	4.73576	3.09398e-11	8.54712e-10	Spermatogenic only
K05F1.9	WBGene00019410	5.71618	3.32703e-11	9.16366e-10	Spermatogenic only
F27E5.3	WBGene00009193	7.98119	4.13599e-11	1.12581e-09	Spermatogenic only
C42C1.3	WBGene00016581	4.16157	4.19134e-11	1.13754e-09	Spermatogenic only
K01H12.4	WBGene00010486	4.4187	4.23718e-11	1.14663e-09	Spermatogenic only
T13F2.9	WBGene00011748	4.68828	4.93729e-11	1.32466e-09	Spermatogenic only
wago-10	WBGene00020707	6.42171	4.93788e-11	1.32466e-09	Spermatogenic only
Y105E8A.27	WBGene00013684	7.3175	5.20699e-11	1.39283e-09	Spermatogenic only
mpst-4	WBGene00017387	5.1517	5.35203e-11	1.42752e-09	Spermatogenic only
C17H12.5	WBGene00015931	4.40826	5.58821e-11	1.48624e-09	Spermatogenic only
best-6	WBGene00015628	7.29147	5.69276e-11	1.50972e-09	Spermatogenic only
F54F12.1	WBGene00010072	4.38526	6.39945e-11	1.68749e-09	Spermatogenic only
C42C1.9	WBGene00016587	3.75688	6.7671e-11	1.77938e-09	Spermatogenic only
ssp-34	WBGene00013858	6.33485	6.93691e-11	1.81888e-09	Spermatogenic only
T22C1.8	WBGene00011918	5.58868	7.70872e-11	2.0099e-09	Oogenic and Spermatogenic
ZK945.7	WBGene00014169	5.56359	8.46439e-11	2.20074e-09	Spermatogenic only
C27D6.3	WBGene00016161	3.9588	8.70406e-11	2.25673e-09	Spermatogenic only
wht-6	WBGene00007060	3.35456	9.11754e-11	2.35736e-09	Spermatogenic only
C41G7.6	WBGene00008063	4.63382	9.14968e-11	2.35909e-09	Spermatogenic only
F25F2.1	WBGene00009115	5.02366	9.26447e-11	2.38207e-09	Oogenic and Spermatogenic
T05C12.1	WBGene00011466	5.04279	1.0193e-10	2.61358e-09	Spermatogenic only
nspd-10	WBGene00020860	4.74563	1.19609e-10	3.04168e-09	Spermatogenic only
F48F5.2	WBGene00009846	6.35568	1.24144e-10	3.1398e-09	Spermatogenic only
Y106G6A.4	WBGene00013696	5.50237	1.27683e-10	3.22053e-09	Spermatogenic only
F31E8.5	WBGene00017955	6.24865	1.48224e-10	3.72849e-09	Oogenic and Spermatogenic
ent-3	WBGene00010510	7.15789	1.5042e-10	3.77352e-09	Spermatogenic only
F01G10.5	WBGene00008508	4.97636	1.57899e-10	3.93985e-09	Spermatogenic only
des-2	WBGene00000955	2.96718	1.66524e-10	4.13283e-09	Spermatogenic only
ZK688.10	WBGene00044447	5.51967	1.84581e-10	4.56876e-09	Spermatogenic only
rnh-1.1	WBGene00022888	4.96741	1.89096e-10	4.66805e-09	Spermatogenic only
ZK637.12	WBGene00014029	5.46872	1.96552e-10	4.83925e-09	Spermatogenic only
btb-2	WBGene00020802	5.47518	2.12394e-10	5.17438e-09	Spermatogenic only
F36A2.14	WBGene00023490	5.50894	2.26579e-10	5.49114e-09	Oogenic and Spermatogenic
F26B1.8	WBGene00194703	4.65158	2.46082e-10	5.94826e-09	Spermatogenic only
C07G1.6	WBGene00015572	5.42287	2.83205e-10	6.81014e-09	Spermatogenic only
ZC477.7	WBGene00022621	4.97216	2.84208e-10	6.81658e-09	Spermatogenic only
F55C12.1	WBGene00018869	1.4312	2.8994e-10	6.91831e-09	Oogenic and Spermatogenic
msp-45	WBGene00003438	3.98431	2.93097e-10	6.9757e-09	Spermatogenic only
ZK686.5	WBGene00022795	6.18106	3.38903e-10	7.98401e-09	Spermatogenic only
aman-3	WBGene00018594	3.65109	3.53373e-10	8.29765e-09	Spermatogenic only
F56F4.3	WBGene00018980	6.15571	3.86278e-10	8.98604e-09	Spermatogenic only
F36A2.12	WBGene00009459	5.35282	4.42437e-10	1.01903e-08	Oogenic and Spermatogenic
tbc-3	WBGene00009322	1.11465	4.91825e-10	1.12719e-08	Oogenic only
C34D4.2	WBGene00016398	4.81933	5.84365e-10	1.32618e-08	Spermatogenic only
R10F2.6	WBGene00019997	3.36886	5.99127e-10	1.35636e-08	Oogenic and Spermatogenic
C02F5.5	WBGene00015348	5.32251	6.42129e-10	1.45018e-08	Oogenic and Spermatogenic
F26F4.2	WBGene00005012	7.50122	6.6007e-10	1.48708e-08	Oogenic and Spermatogenic
frk-1	WBGene00001487	5.34543	6.89346e-10	1.54928e-08	Spermatogenic only
C09B9.2	WBGene00015627	6.06118	7.17747e-10	1.60737e-08	Spermatogenic only
C24D10.2	WBGene00016054	4.83276	7.34252e-10	1.6383e-08	Spermatogenic only
spe-26	WBGene00004972	4.45469	7.37382e-10	1.63922e-08	Spermatogenic only
Y71G12B.27	WBGene00022162	5.32939	7.78633e-10	1.71669e-08	Spermatogenic only
B0244.9	WBGene00015084	6.03334	8.52668e-10	1.87103e-08	Spermatogenic only
F56A11.6	WBGene00018926	4.82286	8.7614e-10	1.918e-08	Spermatogenic only
oac-9	WBGene00016753	4.81481	8.78258e-10	1.91812e-08	Spermatogenic only
C01G10.1	WBGene00007230	4.43866	9.4803e-10	2.0608e-08	Spermatogenic only
F56F3.4	WBGene00010155	5.27155	1.00188e-09	2.15811e-08	Spermatogenic only
R11E3.1	WBGene00020003	4.13772	1.0021e-09	2.15811e-08	Spermatogenic only
C52E4.7	WBGene00008259	5.35537	1.00066e-09	2.15811e-08	Oogenic and Spermatogenic
ZK856.18	WBGene00194912	4.85216	9.95574e-10	2.15811e-08	Spermatogenic only
C05C12.5	WBGene00007337	7.42703	1.02053e-09	2.19272e-08	Spermatogenic only
kin-5	WBGene00002193	5.25878	1.05672e-09	2.26001e-08	Spermatogenic only
T28H11.7	WBGene00020905	4.76835	1.075e-09	2.29383e-08	Spermatogenic only
F36A4.4	WBGene00018083	4.85449	1.10286e-09	2.3425e-08	Spermatogenic only
C32E8.4	WBGene00016322	5.30069	1.11415e-09	2.36108e-08	Oogenic and Spermatogenic
W01B6.2	WBGene00012169	5.95029	1.26538e-09	2.67545e-08	Spermatogenic only
C30G7.3	WBGene00044177	5.94694	1.31359e-09	2.77108e-08	Spermatogenic only
F37A4.5	WBGene00018135	5.24875	1.38112e-09	2.90693e-08	Spermatogenic only
hdl-2	WBGene00006409	6.81815	1.50152e-09	3.13899e-08	Spermatogenic only
ZK484.7	WBGene00022753	6.79508	1.51412e-09	3.15821e-08	Spermatogenic only
T22B3.3	WBGene00011911	4.70918	1.55551e-09	3.23727e-08	Oogenic and Spermatogenic
spe-47	WBGene00021271	4.3351	1.58779e-09	3.29706e-08	Spermatogenic only
C50E10.2	WBGene00016826	4.70501	1.60603e-09	3.3275e-08	Spermatogenic only
fut-1	WBGene00001505	2.68963	1.68781e-09	3.48139e-08	Spermatogenic only
W10C8.5	WBGene00021128	1.78905	1.70195e-09	3.48731e-08	Oogenic and Spermatogenic
gst-5	WBGene00001753	2.26647	1.69734e-09	3.48731e-08	Oogenic and Spermatogenic
C49C3.20	WBGene00185097	5.24259	1.71714e-09	3.51069e-08	Spermatogenic only
K07F5.6	WBGene00010634	7.35642	1.79748e-09	3.66685e-08	Spermatogenic only
C43G2.3	WBGene00016612	7.34175	1.80382e-09	3.67172e-08	Spermatogenic only
C34F11.5	WBGene00016416	6.77027	1.85346e-09	3.73996e-08	Spermatogenic only
Y55B1BR.2	WBGene00021912	1.80564	1.84604e-09	3.73996e-08	Oogenic and Spermatogenic
F42A9.7	WBGene00018336	4.1523	1.85229e-09	3.73996e-08	Spermatogenic only
C08F8.6	WBGene00007448	5.22121	1.90877e-09	3.84321e-08	Spermatogenic only
msd-2	WBGene00009682	4.05752	2.00921e-09	4.03668e-08	Oogenic and Spermatogenic
gln-2	WBGene00001603	6.71213	2.13235e-09	4.27484e-08	Spermatogenic only
C35A5.4	WBGene00007948	6.74428	2.20471e-09	4.41037e-08	Spermatogenic only
sma-1	WBGene00004855	1.15484	2.21055e-09	4.41254e-08	Oogenic and Spermatogenic
ZK418.2	WBGene00022732	4.39147	2.49518e-09	4.94878e-08	Spermatogenic only
D2062.6	WBGene00017058	5.89352	2.65709e-09	5.23634e-08	Oogenic and Spermatogenic
clp-6	WBGene00000546	2.80113	2.75042e-09	5.39734e-08	Spermatogenic only
C09B9.85	WBGene00220250	7.24779	2.97589e-09	5.82747e-08	Spermatogenic only
T23F6.3	WBGene00011951	6.65192	3.06733e-09	5.98128e-08	Spermatogenic only
R148.7	WBGene00020105	5.1359	3.10517e-09	6.04239e-08	Oogenic and Spermatogenic
Y39E4B.11	WBGene00012720	4.40958	3.13317e-09	6.08333e-08	Spermatogenic only
C01G5.4	WBGene00015306	6.66119	3.13932e-09	6.08333e-08	Oogenic and Spermatogenic
F11A10.6	WBGene00008687	1.09034	3.26135e-09	6.29353e-08	Oogenic and Spermatogenic
F34D10.9	WBGene00045484	3.65444	3.30603e-09	6.35333e-08	Spermatogenic only
C55C3.3	WBGene00016953	3.35748	3.31806e-09	6.36327e-08	Oogenic and Spermatogenic
obr-2	WBGene00008832	2.4303	3.43717e-09	6.57811e-08	Oogenic and Spermatogenic
F55C5.2	WBGene00010092	6.6454	3.55536e-09	6.7903e-08	Spermatogenic only
gei-8	WBGene00001565	1.2978	3.82938e-09	7.28366e-08	Oogenic and Spermatogenic
Y47D3A.13	WBGene00012926	5.09875	4.38977e-09	8.33249e-08	Spermatogenic only
F02C9.1	WBGene00017172	6.59141	4.7759e-09	9.04692e-08	Spermatogenic only
elo-4	WBGene00001242	5.791	4.87571e-09	9.19844e-08	Oogenic and Spermatogenic
C31H1.5	WBGene00016288	4.66896	4.96505e-09	9.32906e-08	Spermatogenic only
Y66D12A.3	WBGene00013429	4.28837	4.9974e-09	9.37088e-08	Spermatogenic only
C27D8.1	WBGene00007777	3.72181	5.09594e-09	9.53639e-08	Spermatogenic only
F38H4.4	WBGene00009548	4.06267	5.12058e-09	9.56322e-08	Oogenic and Spermatogenic
Y22D7AR.12	WBGene00021265	4.69644	5.29098e-09	9.82217e-08	Spermatogenic only
M70.3	WBGene00019785	3.73161	5.43572e-09	1.00507e-07	Spermatogenic only
C54G4.3	WBGene00008313	4.27288	5.79825e-09	1.06997e-07	Spermatogenic only
Y48B6A.5	WBGene00012979	5.05517	6.04864e-09	1.11175e-07	Oogenic and Spermatogenic
R155.3	WBGene00020117	5.03788	6.07118e-09	1.11369e-07	Spermatogenic only
W03C9.8	WBGene00012223	5.07406	6.12993e-09	1.12225e-07	Spermatogenic only
K10C9.7	WBGene00019626	7.13598	6.17979e-09	1.12915e-07	Spermatogenic only
fhod-1	WBGene00016735	2.13869	6.50979e-09	1.18246e-07	Spermatogenic only
B0280.11	WBGene00015106	4.0312	6.55514e-09	1.18837e-07	Spermatogenic only
C14B9.2	WBGene00015752	1.3713	6.73852e-09	1.21924e-07	Oogenic and Spermatogenic
mab-3	WBGene00003100	3.74459	6.80958e-09	1.2297e-07	Spermatogenic only
Y54E2A.7	WBGene00013192	6.51974	6.90955e-09	1.24504e-07	Spermatogenic only
msp-10	WBGene00003425	5.74883	7.05732e-09	1.2646e-07	Spermatogenic only
T05F1.8	WBGene00011493	4.63366	7.65213e-09	1.36591e-07	Spermatogenic only
T23F11.2	WBGene00011954	5.03129	7.83124e-09	1.39519e-07	Spermatogenic only
Y106G6G.4	WBGene00013713	4.63157	7.87641e-09	1.40055e-07	Spermatogenic only
ZK546.3	WBGene00022760	7.05866	8.294e-09	1.46638e-07	Spermatogenic only
D2062.7	WBGene00017059	5.68314	8.36562e-09	1.47533e-07	Oogenic and Spermatogenic
acp-2	WBGene00008802	2.98357	8.37642e-09	1.47533e-07	Spermatogenic only
F59A6.4	WBGene00019086	7.11277	8.53238e-09	1.49712e-07	Spermatogenic only
nspd-4	WBGene00020715	6.51256	8.90143e-09	1.55074e-07	Spermatogenic only
F54C9.14	WBGene00175035	3.77686	8.90482e-09	1.55074e-07	Spermatogenic only
H06I04.5	WBGene00019169	6.47189	9.19392e-09	1.5951e-07	Spermatogenic only
ZK1248.5	WBGene00022876	5.6339	9.62346e-09	1.66341e-07	Spermatogenic only
F57F4.1	WBGene00019015	3.89176	1.01836e-08	1.75696e-07	Spermatogenic only
Y53F4B.11	WBGene00013158	3.15994	1.10877e-08	1.90585e-07	Spermatogenic only
H38K22.7	WBGene00044912	7.00447	1.11626e-08	1.91519e-07	Spermatogenic only
T08B2.12	WBGene00020350	3.90819	1.1374e-08	1.94785e-07	Spermatogenic only
ZK1010.5	WBGene00014179	3.93253	1.14558e-08	1.95825e-07	Spermatogenic only
fog-3	WBGene00001483	4.75428	1.21075e-08	2.06206e-07	Oogenic and Spermatogenic
T27C10.8	WBGene00077519	4.54232	1.28576e-08	2.1818e-07	Spermatogenic only
cbs-2	WBGene00018783	5.62258	1.29069e-08	2.18617e-07	Oogenic and Spermatogenic
ZK1053.2	WBGene00014197	5.62455	1.29564e-08	2.19055e-07	Oogenic and Spermatogenic
M110.7	WBGene00010915	6.44106	1.29884e-08	2.19197e-07	Spermatogenic only
Y69E1A.8	WBGene00013478	5.61066	1.35318e-08	2.2754e-07	Spermatogenic only
nlp-4	WBGene00003742	5.00184	1.36797e-08	2.29612e-07	Spermatogenic only
F40H6.1	WBGene00018253	3.79796	1.38459e-08	2.31981e-07	Spermatogenic only
ZC250.5	WBGene00045306	6.4317	1.39412e-08	2.32737e-07	Spermatogenic only
Y48G1C.5	WBGene00021678	2.7385	1.39747e-08	2.32879e-07	Spermatogenic only
msp-78	WBGene00003465	4.13151	1.43355e-08	2.38463e-07	Oogenic and Spermatogenic
F44G3.7	WBGene00009708	4.25937	1.43904e-08	2.38947e-07	Spermatogenic only
F58D2.2	WBGene00010241	5.63773	1.46108e-08	2.42174e-07	Spermatogenic only
F54C8.1	WBGene00010035	4.2	1.46585e-08	2.42531e-07	Spermatogenic only
T06C10.3	WBGene00020289	6.94821	1.53071e-08	2.52813e-07	Spermatogenic only
sst-20	WBGene00006058	5.60497	1.56883e-08	2.5819e-07	Spermatogenic only
C04G2.5	WBGene00007306	4.96435	1.72395e-08	2.83217e-07	Spermatogenic only
F57H12.5	WBGene00019020	6.94911	1.73861e-08	2.8512e-07	Spermatogenic only
F02E9.3	WBGene00008529	4.92045	1.8697e-08	3.05538e-07	Spermatogenic only
R10E4.7	WBGene00011203	2.926	1.87738e-08	3.06254e-07	Oogenic and Spermatogenic
T04F3.3	WBGene00011438	4.18965	1.95727e-08	3.18726e-07	Spermatogenic only
nkb-2	WBGene00008074	6.35215	1.99846e-08	3.24864e-07	Spermatogenic only
C55A6.4	WBGene00008333	2.35436	2.00628e-08	3.25564e-07	Spermatogenic only
Y43C5B.3	WBGene00012786	5.6214	2.04814e-08	3.30949e-07	Spermatogenic only
Y69A2AR.14	WBGene00022085	6.35314	2.05373e-08	3.30949e-07	Spermatogenic only
tag-164	WBGene00006509	3.63412	2.05088e-08	3.30949e-07	Spermatogenic only
Y57G7A.5	WBGene00021968	4.97772	2.07617e-08	3.33987e-07	Spermatogenic only
esyt-2	WBGene00020443	1.80784	2.15064e-08	3.44176e-07	Oogenic and Spermatogenic
lmd-1	WBGene00009665	1.18985	2.22807e-08	3.55954e-07	Oogenic only
T08G3.4	WBGene00011617	5.53248	2.28539e-08	3.63859e-07	Spermatogenic only
F11G11.4	WBGene00017384	4.49983	2.29257e-08	3.64377e-07	Spermatogenic only
K01D12.7	WBGene00010466	4.90159	2.3e-08	3.64933e-07	Oogenic and Spermatogenic
M70.1	WBGene00019783	4.93786	2.33454e-08	3.68905e-07	Spermatogenic only
Y37D8A.5	WBGene00012547	6.31868	2.33696e-08	3.68905e-07	Spermatogenic only
F54H12.7	WBGene00044633	4.88091	2.36236e-08	3.72283e-07	Spermatogenic only
F26A3.5	WBGene00009143	5.52679	2.42526e-08	3.81546e-07	Spermatogenic only
F58A6.5	WBGene00019024	5.55058	2.47209e-08	3.87722e-07	Spermatogenic only
T03F6.6	WBGene00011401	5.5513	2.47286e-08	3.87722e-07	Spermatogenic only
col-149	WBGene00000722	2.15591	2.56679e-08	4.00419e-07	Spermatogenic only
H04J21.1	WBGene00019150	6.29898	2.58914e-08	4.02583e-07	Spermatogenic only
Y46G5A.22	WBGene00012912	4.87519	2.58934e-08	4.02583e-07	Spermatogenic only
C18H7.4	WBGene00015994	4.48067	2.63086e-08	4.08355e-07	Spermatogenic only
Y46G5A.14	WBGene00012905	4.43643	2.65264e-08	4.10363e-07	Spermatogenic only
F21H7.2	WBGene00009028	5.50864	2.68038e-08	4.13965e-07	Spermatogenic only
pme-5	WBGene00004053	1.35625	2.70176e-08	4.16574e-07	Oogenic and Spermatogenic
R09E10.2	WBGene00011172	4.44602	2.96502e-08	4.55651e-07	Oogenic and Spermatogenic
T28B8.4	WBGene00012115	4.89024	2.97306e-08	4.56131e-07	Spermatogenic only
ZK1225.4	WBGene00014238	4.87993	3.06502e-08	4.6792e-07	Spermatogenic only
F47B3.7	WBGene00018531	6.2837	3.06268e-08	4.6792e-07	Spermatogenic only
Y50E8A.12	WBGene00013055	4.17214	3.15212e-08	4.80291e-07	Spermatogenic only
F56D6.22	WBGene00235359	6.3084	3.16372e-08	4.80291e-07	Spermatogenic only
wht-8	WBGene00012925	6.29057	3.21343e-08	4.85782e-07	Spermatogenic only
col-129	WBGene00000703	1.09707	3.22053e-08	4.86064e-07	Spermatogenic only
htas-1	WBGene00014240	4.46599	3.3974e-08	5.08623e-07	Spermatogenic only
C55A6.3	WBGene00008332	3.62724	3.41189e-08	5.09269e-07	Spermatogenic only
D1081.5	WBGene00008383	5.50054	3.41268e-08	5.09269e-07	Spermatogenic only
B0379.7	WBGene00007159	5.51556	3.42313e-08	5.10008e-07	Spermatogenic only
K06A1.2	WBGene00019425	5.49158	3.43035e-08	5.10264e-07	Spermatogenic only
ZK930.7	WBGene00014157	3.93279	3.48232e-08	5.17166e-07	Spermatogenic only
Y71G12B.30	WBGene00044347	4.46691	3.69526e-08	5.453e-07	Oogenic and Spermatogenic
F40F9.3	WBGene00009581	6.24006	3.71147e-08	5.46824e-07	Spermatogenic only
dhhc-12	WBGene00010323	6.26095	3.7369e-08	5.48828e-07	Spermatogenic only
F44D12.8	WBGene00009685	6.2279	3.86688e-08	5.67021e-07	Spermatogenic only
oac-50	WBGene00020864	5.5127	3.99587e-08	5.83171e-07	Spermatogenic only
C32D5.4	WBGene00016312	5.4584	4.05284e-08	5.90556e-07	Spermatogenic only
Y43F8C.5	WBGene00012827	3.88443	4.07032e-08	5.92175e-07	Oogenic and Spermatogenic
T21G5.1	WBGene00020659	4.88412	4.17643e-08	6.0561e-07	Spermatogenic only
F58G1.3	WBGene00010265	6.20072	4.58295e-08	6.60542e-07	Spermatogenic only
col-73	WBGene00000649	2.59572	4.61469e-08	6.64086e-07	Oogenic and Spermatogenic
sfxn-1.4	WBGene00008137	2.83609	4.7936e-08	6.877e-07	Oogenic and Spermatogenic
K09E4.1	WBGene00010719	3.99303	4.87065e-08	6.97675e-07	Spermatogenic only
F35E2.5	WBGene00009412	5.39022	4.93226e-08	7.05412e-07	Spermatogenic only
B0511.11	WBGene00015236	2.55141	5.20027e-08	7.39186e-07	Spermatogenic only
C47E12.10	WBGene00008153	6.19434	5.22077e-08	7.40966e-07	Spermatogenic only
E03H12.7	WBGene00017114	4.80323	5.62638e-08	7.94887e-07	Spermatogenic only
W03D8.10	WBGene00020991	5.44128	5.64577e-08	7.96414e-07	Spermatogenic only
F52H3.6	WBGene00009948	4.37209	6.09011e-08	8.55196e-07	Spermatogenic only
C28C12.1	WBGene00016177	3.27538	6.80318e-08	9.48155e-07	Spermatogenic only
ZC477.2	WBGene00022617	5.35683	7.08152e-08	9.85467e-07	Spermatogenic only
F56B3.6	WBGene00018930	4.77851	7.18171e-08	9.94934e-07	Spermatogenic only
T20F5.5	WBGene00020627	3.38474	7.27774e-08	1.00674e-06	Oogenic and Spermatogenic
C33H5.16	WBGene00016382	6.11771	7.60302e-08	1.04949e-06	Spermatogenic only
Y53F4B.19	WBGene00013165	4.37062	7.6094e-08	1.04949e-06	Spermatogenic only
ZK858.8	WBGene00014121	4.73345	7.67595e-08	1.05397e-06	Spermatogenic only
Y47D3A.31	WBGene00012937	4.40766	7.74834e-08	1.06234e-06	Spermatogenic only
T15B12.2	WBGene00020531	4.76061	8.03696e-08	1.09866e-06	Spermatogenic only
C29F5.3	WBGene00016212	6.113	8.0949e-08	1.10495e-06	Spermatogenic only
F21D9.2	WBGene00009016	4.75149	8.30958e-08	1.13259e-06	Spermatogenic only
F26D2.10	WBGene00009149	5.35606	8.4261e-08	1.14513e-06	Oogenic and Spermatogenic
Y67A6A.1	WBGene00013449	5.39855	8.42622e-08	1.14513e-06	Spermatogenic only
C09B9.7	WBGene00015630	6.08522	8.45205e-08	1.14696e-06	Spermatogenic only
F53G12.8	WBGene00018773	5.37532	8.51425e-08	1.15371e-06	Spermatogenic only
Y39B6A.25	WBGene00012684	5.3555	8.61522e-08	1.16569e-06	Spermatogenic only
kin-24	WBGene00002206	6.09553	8.64133e-08	1.16752e-06	Spermatogenic only
ctg-2	WBGene00011756	2.48911	8.7699e-08	1.18145e-06	Oogenic and Spermatogenic
oac-23	WBGene00018143	6.09665	8.8327e-08	1.18819e-06	Spermatogenic only
F54H12.8	WBGene00045247	4.71962	8.91895e-08	1.19806e-06	Spermatogenic only
F35E2.9	WBGene00009416	4.32157	8.97695e-08	1.2041e-06	Spermatogenic only
C32E12.1	WBGene00016327	5.32905	9.05669e-08	1.21305e-06	Spermatogenic only
mps-3	WBGene00020282	5.34668	9.52389e-08	1.27195e-06	Spermatogenic only
C06A1.3	WBGene00007354	6.08122	9.69518e-08	1.29297e-06	Spermatogenic only
F41G3.5	WBGene00018301	5.32533	1.00597e-07	1.33773e-06	Spermatogenic only
ssp-35	WBGene00010091	4.27168	1.01505e-07	1.34788e-06	Spermatogenic only
wht-5	WBGene00008950	5.32151	1.0459e-07	1.38489e-06	Spermatogenic only
best-26	WBGene00014103	5.311	1.07329e-07	1.41309e-06	Spermatogenic only
ZK84.2	WBGene00022650	5.37204	1.11851e-07	1.46638e-06	Spermatogenic only
col-39	WBGene00000616	2.71081	1.13365e-07	1.48205e-06	Oogenic and Spermatogenic
M176.9	WBGene00014813	6.03964	1.21208e-07	1.5757e-06	Spermatogenic only
wht-4	WBGene00017179	4.32114	1.22729e-07	1.59103e-06	Spermatogenic only
F36H12.4	WBGene00018120	5.34068	1.24891e-07	1.61454e-06	Spermatogenic only
Y1A5A.1	WBGene00012379	5.28385	1.25409e-07	1.61898e-06	Spermatogenic only
ftn-2	WBGene00001501	1.12521	1.29739e-07	1.67023e-06	Spermatogenic only
B0207.1	WBGene00015026	6.04499	1.36452e-07	1.7518e-06	Spermatogenic only
C27D8.2	WBGene00007778	5.30485	1.38006e-07	1.76724e-06	Spermatogenic only
ZK1098.6	WBGene00014223	3.17102	1.41088e-07	1.80383e-06	Spermatogenic only
toca-2	WBGene00010663	1.16938	2.24514e-07	2.74564e-06	Oogenic only
W02D7.4	WBGene00020940	2.89987	2.41182e-07	2.94173e-06	Spermatogenic only
F27D4.6	WBGene00009190	2.18152	2.64741e-07	3.208e-06	Spermatogenic only
col-77	WBGene00000653	3.32461	3.63844e-07	4.23208e-06	Spermatogenic only
kin-14	WBGene00002198	2.72619	4.00454e-07	4.60597e-06	Oogenic and Spermatogenic
gcy-12	WBGene00001538	1.40778	4.43901e-07	5.07425e-06	Spermatogenic only
C14B1.3	WBGene00007574	1.71729	4.68778e-07	5.33235e-06	Oogenic and Spermatogenic
col-92	WBGene00000667	1.94671	5.47322e-07	6.12816e-06	Oogenic and Spermatogenic
act-5	WBGene00000067	1.00259	6.30463e-07	6.95833e-06	Oogenic and Spermatogenic
B0261.6	WBGene00015094	4.75908	7.50076e-07	8.1716e-06	Spermatogenic only
W09C3.7	WBGene00021114	1.46837	7.5385e-07	8.20309e-06	Spermatogenic only
cth-1	WBGene00009048	2.39636	8.02324e-07	8.63941e-06	Spermatogenic only
T16G1.9	WBGene00011802	1.13484	8.28448e-07	8.88977e-06	Oogenic and Spermatogenic
C53D5.1	WBGene00016902	1.27371	8.34315e-07	8.94042e-06	Oogenic and Spermatogenic
ugt-62	WBGene00010904	1.74334	9.0198e-07	9.5682e-06	Oogenic and Spermatogenic
rpn-6.2	WBGene00010309	1.71571	9.09642e-07	9.63847e-06	Oogenic and Spermatogenic
Y54E5A.2	WBGene00013198	2.70937	9.72604e-07	1.02355e-05	Spermatogenic only
T01B11.2	WBGene00020139	1.47024	1.00204e-06	1.05096e-05	Spermatogenic only
C38H2.2	WBGene00008019	1.60002	1.05178e-06	1.09517e-05	Spermatogenic only
col-133	WBGene00000707	2.78147	1.66245e-06	1.6381e-05	Spermatogenic only
W02D9.2	WBGene00012208	1.00888	1.69457e-06	1.66621e-05	Oogenic only
aat-6	WBGene00000007	2.47652	1.91747e-06	1.85976e-05	Spermatogenic only
F22B8.7	WBGene00009049	2.22736	2.10808e-06	2.02333e-05	Oogenic and Spermatogenic
mlcd-1	WBGene00009439	1.10884	2.39212e-06	2.2773e-05	Oogenic and Spermatogenic
exl-1	WBGene00001371	1.95299	2.50728e-06	2.37233e-05	Oogenic and Spermatogenic
ZK637.14	WBGene00014031	2.2143	2.51673e-06	2.3773e-05	Oogenic and Spermatogenic
F41F3.3	WBGene00018297	2.4366	3.40882e-06	3.10202e-05	Oogenic and Spermatogenic
C56A3.8	WBGene00008346	1.71875	3.81366e-06	3.43674e-05	Oogenic and Spermatogenic
R07B7.4	WBGene00011088	2.47908	4.2378e-06	3.78585e-05	Spermatogenic only
C55B7.3	WBGene00016942	2.05304	6.17607e-06	5.24006e-05	Spermatogenic only
Y54G11A.19	WBGene00235256	1.06316	6.51804e-06	5.48012e-05	Oogenic and Spermatogenic
B0024.13	WBGene00007102	1.03337	6.59001e-06	5.52561e-05	Oogenic only
Y71F9AL.4	WBGene00022110	2.01605	7.66197e-06	6.33854e-05	Spermatogenic only
C18H2.1	WBGene00015988	1.83273	1.47248e-05	0.000113326	Spermatogenic only
F58H1.6	WBGene00010289	4.41125	1.48104e-05	0.000113706	Oogenic and Spermatogenic
snf-9	WBGene00004908	1.50716	1.62745e-05	0.00012382	Spermatogenic only
glna-3	WBGene00009271	2.13532	1.77975e-05	0.000134088	Oogenic and Spermatogenic
ndx-2	WBGene00003579	2.11666	2.22397e-05	0.000164881	Spermatogenic only
exc-9	WBGene00017644	2.1824	2.61929e-05	0.000190984	Oogenic and Spermatogenic
T07F10.1	WBGene00011587	1.15669	2.7562e-05	0.000200337	Spermatogenic only
F56A8.4	WBGene00010140	1.08617	2.93365e-05	0.000211908	Oogenic only
Y54E2A.8	WBGene00013193	1.10204	3.50954e-05	0.000248479	Oogenic and Spermatogenic
F30F8.10	WBGene00009277	1.09107	3.94141e-05	0.000275691	Oogenic only
bre-1	WBGene00000266	1.59712	4.17001e-05	0.000289499	Spermatogenic only
fncm-1	WBGene00018908	1.04989	4.84609e-05	0.000331233	Oogenic only
F26F4.8	WBGene00005011	1.2088	5.58847e-05	0.000376158	Oogenic and Spermatogenic
ram-2	WBGene00004300	1.24182	8.89517e-05	0.000580625	Oogenic and Spermatogenic
spin-1	WBGene00007549	1.6396	0.000171819	0.00106892	Spermatogenic only
ZC250.4	WBGene00045305	1.26515	0.000175559	0.00108999	Oogenic and Spermatogenic
C34C6.4	WBGene00007917	1.09804	0.000177913	0.00110313	Oogenic and Spermatogenic
C38D4.7	WBGene00008007	1.65191	0.000189818	0.00116991	Spermatogenic only
tni-1	WBGene00006584	1.3192	0.000193617	0.00119017	Oogenic and Spermatogenic
Y24D9B.1	WBGene00021287	4.13754	0.000211176	0.00129211	Oogenic and Spermatogenic
lin-33	WBGene00003019	1.76628	0.000213794	0.00130641	Spermatogenic only
M176.4	WBGene00010943	1.1007	0.000255238	0.00154039	Oogenic and Spermatogenic
F20D6.11	WBGene00017640	1.45391	0.000273817	0.00164609	Oogenic and Spermatogenic
T09B4.8	WBGene00020382	1.0459	0.000354273	0.00208388	Oogenic and Spermatogenic
col-71	WBGene00000647	1.89395	0.000372466	0.00218259	Oogenic and Spermatogenic
npl-4.2	WBGene00019121	1.29514	0.000391128	0.00228043	Oogenic only
F17A9.4	WBGene00017536	1.57854	0.000391967	0.00228389	Oogenic and Spermatogenic
ben-1	WBGene00000248	1.12843	0.00041532	0.00240038	Oogenic and Spermatogenic
cysl-2	WBGene00010759	1.32263	0.000455649	0.00261716	Oogenic only
T14D7.1	WBGene00011767	1.37749	0.000467685	0.00267966	Oogenic and Spermatogenic
F15D4.5	WBGene00008862	1.41151	0.000483478	0.00276333	Spermatogenic only
ife-5	WBGene00002063	1.21913	0.000499124	0.00284225	Oogenic and Spermatogenic
nape-2	WBGene00021370	1.57427	0.000536222	0.0030275	Oogenic and Spermatogenic
Y32F6A.6	WBGene00044209	1.54481	0.000648655	0.00361828	Spermatogenic only
col-94	WBGene00000669	1.27465	0.000664882	0.00369768	Spermatogenic only
R05H5.4	WBGene00011039	1.51534	0.000680863	0.00377075	Spermatogenic only
swt-3	WBGene00007384	1.20437	0.000718424	0.00395048	Spermatogenic only
abt-2	WBGene00000020	1.3025	0.000849004	0.0046101	Spermatogenic only
ifb-2	WBGene00002054	1.1292	0.000934639	0.00503501	Oogenic and Spermatogenic
Y47G6A.26	WBGene00021650	3.5482	0.00106417	0.00568662	Spermatogenic only
tom-1	WBGene00006594	1.00472	0.00108487	0.00579389	Spermatogenic only
aagr-4	WBGene00018682	1.11859	0.00112816	0.00599747	Oogenic only
C44C10.9	WBGene00008089	1.08747	0.00154834	0.00796215	Spermatogenic only
swt-4	WBGene00012647	1.16958	0.00187684	0.00948333	Oogenic and Spermatogenic

## Sheet: OO enriched P<0.01
Gene name	Wormbase ID	log2 fold enrichment SP/OO (FBF iCLIP)	Unadjusted p value	BH-corrected p value	Program (Noble et al. 2016)
clec-87	WBGene00007709	-3.90183	1.26681e-98	1.17585e-94	Oogenic only
mrp-4	WBGene00003410	-4.91731	3.27383e-94	1.51938e-90	Oogenic only
meg-1	WBGene00010492	-5.81213	7.11474e-67	1.10065e-63	Oogenic only
puf-5	WBGene00004241	-2.25028	1.48683e-50	1.72509e-47	Oogenic only
cpg-2	WBGene00015102	-2.24589	1.72745e-47	1.60342e-44	Oogenic and Spermatogenic
C01G8.1	WBGene00015312	-2.03259	6.21472e-37	3.11001e-34	Oogenic only
die-1	WBGene00000995	-3.45678	1.01196e-35	4.26956e-33	Oogenic only
pos-1	WBGene00004078	-2.29542	1.48457e-35	5.74158e-33	Oogenic and Spermatogenic
cpg-1	WBGene00000465	-1.92941	2.90961e-33	1.08028e-30	Oogenic only
spn-4	WBGene00004984	-2.16953	2.71073e-32	8.98607e-30	Oogenic only
cpg-3	WBGene00011063	-4.12211	2.97026e-32	9.50689e-30	Oogenic only
W05F2.3	WBGene00021035	-2.1982	3.54569e-31	1.06165e-28	Oogenic only
Y52B11A.8	WBGene00013127	-2.73674	1.44414e-29	3.43706e-27	Oogenic only
F14H3.6	WBGene00008825	-5.37181	1.91005e-29	4.38836e-27	Oogenic only
gyg-2	WBGene00012020	-2.12862	7.6761e-29	1.5489e-26	Oogenic and Spermatogenic
F32D1.7	WBGene00017986	-1.83986	1.11156e-28	2.14947e-26	Oogenic and Spermatogenic
clec-91	WBGene00014117	-3.66836	6.89702e-27	1.16397e-24	Oogenic only
egg-1	WBGene00015083	-1.82107	1.10058e-26	1.82422e-24	Oogenic only
T01C3.3	WBGene00011320	-2.52061	1.76702e-26	2.87746e-24	Oogenic only
cyb-3	WBGene00000868	-1.72518	1.20159e-25	1.85886e-23	Oogenic only
T24D1.3	WBGene00011986	-1.55892	1.96536e-24	2.68272e-22	Oogenic only
rme-2	WBGene00004374	-1.88866	5.04455e-24	6.59485e-22	Oogenic only
gei-12	WBGene00001569	-4.37698	6.84702e-24	8.70603e-22	Oogenic only
clec-88	WBGene00019606	-2.04545	9.30337e-24	1.15139e-21	Oogenic only
mesp-1	WBGene00016178	-1.64032	1.91783e-22	2.19996e-20	Oogenic and Spermatogenic
chtl-1	WBGene00018037	-4.11062	2.64031e-22	2.88321e-20	Oogenic only
puf-3	WBGene00004239	-2.14484	2.87541e-22	3.10344e-20	Oogenic only
inx-3	WBGene00002125	-5.17528	1.56892e-21	1.5829e-19	Oogenic only
lin-41	WBGene00003026	-1.81494	1.35291e-20	1.2814e-18	Oogenic only
T21C9.13	WBGene00011898	-2.57098	1.63512e-20	1.53305e-18	Oogenic only
oma-2	WBGene00003865	-1.88581	3.28383e-19	2.77095e-17	Oogenic and Spermatogenic
dab-1	WBGene00000894	-1.27175	3.49582e-19	2.92326e-17	Oogenic only
Y51F10.2	WBGene00021763	-2.75273	2.04464e-18	1.58153e-16	Oogenic and Spermatogenic
his-24	WBGene00001898	-2.70957	1.28063e-17	9.21455e-16	Oogenic and Spermatogenic
T09B4.5	WBGene00020379	-4.08774	1.3263e-17	9.46977e-16	Oogenic only
dyn-1	WBGene00001130	-1.89596	1.93527e-17	1.36085e-15	Oogenic only
cbd-1	WBGene00010351	-1.26396	2.42473e-17	1.69221e-15	Oogenic only
R05H5.3	WBGene00011038	-2.09828	2.5538e-17	1.76899e-15	Oogenic and Spermatogenic
mex-3	WBGene00003229	-1.63812	5.56519e-17	3.68972e-15	Oogenic only
wdr-5.3	WBGene00013862	-1.26668	1.21152e-16	7.8639e-15	Oogenic only
ZK829.9	WBGene00014097	-5.52265	1.24737e-16	8.04036e-15	Oogenic only
gln-5	WBGene00001606	-1.47622	1.67407e-16	1.07164e-14	Oogenic only
mex-6	WBGene00003231	-1.38338	4.17751e-16	2.53436e-14	Oogenic only
W02F12.3	WBGene00020948	-1.7229	4.63422e-16	2.75736e-14	Oogenic only
egg-5	WBGene00020035	-1.796	6.03345e-16	3.54446e-14	Oogenic only
mex-1	WBGene00003228	-1.34774	1.26123e-15	7.13823e-14	Oogenic only
cdc-25.2	WBGene00000387	-4.9577	1.48469e-15	8.35206e-14	Oogenic only
daf-18	WBGene00000913	-1.27321	2.53439e-15	1.35197e-13	Oogenic only
R04D3.3	WBGene00011011	-6.91039	3.35629e-15	1.75017e-13	Oogenic only
klp-15	WBGene00002225	-1.35021	3.74265e-15	1.90875e-13	Oogenic only
F13C5.2	WBGene00017423	-2.89559	5.53141e-15	2.71654e-13	Oogenic only
F18A1.7	WBGene00017548	-1.72131	6.88545e-15	3.29437e-13	Oogenic only
F43G6.7	WBGene00009659	-4.27257	7.68104e-15	3.60078e-13	Oogenic only
rab-14	WBGene00004276	-2.23106	9.39067e-15	4.35821e-13	Oogenic only
gna-2	WBGene00001647	-1.80927	1.55695e-14	7.08411e-13	Oogenic only
C36C9.1	WBGene00016485	-4.01378	6.23336e-14	2.67861e-12	Oogenic only
rskn-1	WBGene00011352	-1.42771	7.69934e-14	3.19041e-12	Oogenic only
meg-2	WBGene00010493	-3.29518	8.42879e-14	3.47716e-12	Oogenic only
T05H10.4	WBGene00011509	-4.96222	8.93139e-14	3.66819e-12	Oogenic only
T12G3.6	WBGene00011741	-4.28626	1.18257e-13	4.77244e-12	Oogenic and Spermatogenic
H02I12.5	WBGene00010353	-1.62555	1.39026e-13	5.56226e-12	Oogenic and Spermatogenic
ZC308.4	WBGene00022586	-3.5349	1.46319e-13	5.77929e-12	Oogenic only
EEED8.3	WBGene00017134	-3.54783	1.68369e-13	6.53891e-12	Oogenic only
T09B9.1	WBGene00011642	-6.01943	1.77567e-13	6.86741e-12	Oogenic only
Y62E10A.14	WBGene00013380	-1.21315	2.66312e-13	9.92736e-12	Oogenic and Spermatogenic
mek-1	WBGene00003185	-2.3474	3.02863e-13	1.12447e-11	Oogenic only
ztf-11	WBGene00009939	-3.98054	4.03113e-13	1.47311e-11	Oogenic only
gln-6	WBGene00001607	-1.28835	4.93916e-13	1.77695e-11	Oogenic and Spermatogenic
F28C1.3	WBGene00009201	-1.62108	5.93033e-13	2.10097e-11	Oogenic only
fbxc-50	WBGene00015912	-3.5138	1.11569e-12	3.8355e-11	Oogenic only
F14H3.5	WBGene00008824	-8.57171	2.3577e-12	7.87199e-11	Oogenic only
F02E8.4	WBGene00017177	-6.19094	2.75013e-12	9.14935e-11	Oogenic only
pkn-1	WBGene00009793	-1.59771	2.85682e-12	9.43666e-11	Oogenic only
egg-2	WBGene00019811	-1.41137	2.95514e-12	9.72682e-11	Oogenic only
C18B12.4	WBGene00007666	-1.93403	3.11617e-12	1.02206e-10	Oogenic only
K04C1.2	WBGene00010552	-2.76595	3.12767e-12	1.02222e-10	Oogenic only
C01G6.3	WBGene00007225	-8.48177	3.46964e-12	1.13001e-10	Oogenic only
try-1	WBGene00006619	-6.15234	3.90719e-12	1.26364e-10	Oogenic only
F08F3.6	WBGene00017263	-7.28285	5.79921e-12	1.83089e-10	Oogenic only
C04B4.2	WBGene00007290	-6.08199	8.38549e-12	2.56878e-10	Oogenic only
srap-1	WBGene00011522	-1.61149	9.36837e-12	2.83248e-10	Oogenic only
ent-5	WBGene00017532	-8.34124	9.8056e-12	2.93234e-10	Oogenic only
T22F3.3	WBGene00020696	-1.04179	9.825e-12	2.93234e-10	Oogenic only
mes-1	WBGene00003219	-3.03572	1.06888e-11	3.17993e-10	Oogenic only
amx-1	WBGene00000137	-3.24036	1.19123e-11	3.52134e-10	Oogenic only
perm-1	WBGene00011350	-1.38434	1.3052e-11	3.84599e-10	Oogenic only
B0416.5	WBGene00015181	-1.47906	1.93968e-11	5.57402e-10	Oogenic only
ergo-1	WBGene00019971	-1.09114	3.45197e-11	9.47963e-10	Oogenic only
F43G6.10	WBGene00009662	-2.437	1.17751e-10	3.00266e-09	Oogenic only
rnr-2	WBGene00004392	-1.42805	1.20016e-10	3.04367e-09	Oogenic only
K04C1.5	WBGene00010555	-6.79394	1.61991e-10	4.03111e-09	Oogenic only
cht-1	WBGene00000503	-7.71939	2.01672e-10	4.95218e-09	Oogenic only
pie-1	WBGene00004027	-1.04248	2.10057e-10	5.13092e-09	Oogenic only
CC8.2	WBGene00016987	-1.62545	2.18019e-10	5.29751e-09	Oogenic only
C35E7.5	WBGene00016457	-6.68519	3.1945e-10	7.54488e-09	Oogenic only
otub-3	WBGene00009007	-1.3005	3.54004e-10	8.29765e-09	Oogenic only
epg-2	WBGene00021468	-3.08301	3.67292e-10	8.58741e-09	Oogenic and Spermatogenic
puf-7	WBGene00004243	-1.3273	3.83807e-10	8.95099e-09	Oogenic only
sri-40	WBGene00005552	-2.32497	4.15267e-10	9.63626e-09	Spermatogenic only
nos-2	WBGene00003784	-6.65559	4.31152e-10	9.95512e-09	Oogenic only
nhr-71	WBGene00003661	-2.46265	5.50092e-10	1.25453e-08	Oogenic only
alg-2	WBGene00000106	-1.88815	7.38195e-10	1.63922e-08	Oogenic only
rnr-1	WBGene00004391	-1.34111	1.08816e-09	2.31658e-08	Oogenic only
acs-13	WBGene00022037	-1.01723	1.40827e-09	2.95737e-08	Oogenic only
marc-3	WBGene00007643	-1.39434	1.82945e-09	3.71574e-08	Oogenic only
unc-84	WBGene00006816	-1.90089	2.48331e-09	4.93577e-08	Oogenic only
F45D3.4	WBGene00009724	-1.6267	2.57462e-09	5.09545e-08	Spermatogenic only
gpd-1	WBGene00001683	-1.50194	3.76371e-09	7.17347e-08	Oogenic only
F31E8.4	WBGene00017954	-2.6035	4.80009e-09	9.07422e-08	Oogenic only
F53F4.13	WBGene00009995	-1.29419	4.93336e-09	9.28832e-08	Spermatogenic only
puf-11	WBGene00022257	-1.17102	6.92133e-09	1.24504e-07	Oogenic only
icl-1	WBGene00001564	-1.12362	6.96879e-09	1.25115e-07	Spermatogenic only
T05F1.2	WBGene00011489	-1.22703	8.57695e-09	1.5021e-07	Oogenic only
rmd-2	WBGene00007786	-1.07923	8.88689e-09	1.55074e-07	Oogenic only
sex-1	WBGene00004786	-2.47376	2.10274e-08	3.37092e-07	Oogenic only
mcm-2	WBGene00003154	-1.27553	3.16675e-08	4.80291e-07	Oogenic only
F52D2.12	WBGene00219451	-2.46537	3.20492e-08	4.85287e-07	Oogenic only
C27C12.3	WBGene00007773	-1.68959	5.58727e-08	7.90564e-07	Oogenic only
gld-1	WBGene00001595	-1.2621	8.75111e-08	1.18064e-06	Oogenic only
ptr-2	WBGene00004217	-1.22457	9.86821e-08	1.31416e-06	Oogenic only
pcn-1	WBGene00003955	-1.11818	1.44299e-07	1.83729e-06	Oogenic and Spermatogenic
F10D7.5	WBGene00017342	-1.6682	1.79919e-07	2.25373e-06	Oogenic only
nasp-2	WBGene00008218	-1.25187	2.61293e-07	3.1745e-06	Oogenic only
F28F8.9	WBGene00044188	-1.36429	2.86997e-07	3.42845e-06	Oogenic only
miz-1	WBGene00011259	-1.19366	3.45513e-07	4.0442e-06	Oogenic only
egg-3	WBGene00009701	-1.09754	3.55403e-07	4.13908e-06	Oogenic only
C05C10.5	WBGene00007332	-1.26407	5.33883e-07	5.99215e-06	Oogenic only
F40F4.7	WBGene00018238	-1.48752	5.62021e-07	6.26252e-06	Oogenic only
lsm-1	WBGene00003076	-1.20089	5.63173e-07	6.26783e-06	Oogenic only
Y53C10A.6	WBGene00013137	-1.46477	5.95748e-07	6.60661e-06	Oogenic only
spsb-2	WBGene00021596	-1.92785	8.35094e-07	8.94042e-06	Oogenic only
F21D5.1	WBGene00009006	-1.03795	8.81785e-07	9.3754e-06	Oogenic only
egg-4	WBGene00020652	-1.28029	9.45101e-07	9.99137e-06	Oogenic only
cdh-4	WBGene00000396	-1.31565	1.0507e-06	1.09517e-05	Oogenic only
mcm-5	WBGene00003157	-1.05915	1.32282e-06	1.33235e-05	Oogenic only
F16B12.6	WBGene00008882	-1.65633	1.33738e-06	1.34424e-05	Oogenic only
C14B1.9	WBGene00007580	-1.03789	1.39266e-06	1.38847e-05	Oogenic only
F28H1.1	WBGene00017908	-1.67025	3.15211e-06	2.88539e-05	Oogenic only
tag-349	WBGene00013538	-1.21655	5.20647e-06	4.52546e-05	Oogenic only
sax-3	WBGene00004729	-1.46231	5.66177e-06	4.87048e-05	Oogenic only
sygl-1	WBGene00012104	-1.11379	6.02483e-06	5.13993e-05	Oogenic only
fbxa-215	WBGene00012879	-1.31574	6.06386e-06	5.16848e-05	Oogenic only
acs-2	WBGene00009221	-1.33073	7.76845e-06	6.39811e-05	Oogenic and Spermatogenic
hosl-1	WBGene00016704	-1.92261	7.90356e-06	6.50362e-05	Oogenic only
Y75B12B.1	WBGene00013567	-1.61028	1.01566e-05	8.10969e-05	Oogenic only
sodh-1	WBGene00010790	-1.11855	1.04262e-05	8.29275e-05	Oogenic and Spermatogenic
pqn-65	WBGene00004148	-1.18917	1.04866e-05	8.32651e-05	Oogenic only
dpy-27	WBGene00001086	-1.49193	1.33159e-05	0.000103689	Oogenic only
hmg-11	WBGene00001976	-1.68448	1.38275e-05	0.000107224	Oogenic only
Y4C6A.3	WBGene00021153	-1.49519	1.40813e-05	0.000109009	Oogenic only
aak-2	WBGene00020142	-1.09703	1.42253e-05	0.000109904	Oogenic only
tgt-2	WBGene00006567	-1.39651	1.75361e-05	0.000132549	Oogenic only
nhr-4	WBGene00003603	-1.84836	1.90988e-05	0.000143195	Oogenic only
ppk-3	WBGene00004089	-1.43105	2.05744e-05	0.000153761	Oogenic only
Y65B4A.10	WBGene00220188	-1.43251	2.06589e-05	0.000154169	Oogenic and Spermatogenic
cam-1	WBGene00000289	-1.49423	2.28948e-05	0.000169296	Oogenic only
F11A5.9	WBGene00008677	-1.26144	2.8104e-05	0.000204117	Oogenic only
mei-2	WBGene00003184	-1.01206	2.97803e-05	0.000214779	Oogenic only
R07E4.5	WBGene00019938	-1.66169	3.43909e-05	0.000244236	Oogenic only
daf-1	WBGene00000897	-1.10668	3.86516e-05	0.00027107	Oogenic only
sem-5	WBGene00004774	-1.57487	4.717e-05	0.00032384	Oogenic and Spermatogenic
atg-11	WBGene00020334	-1.45057	4.81751e-05	0.000329765	Oogenic only
ekl-5	WBGene00012512	-1.25954	5.41024e-05	0.00036522	Oogenic only
sdc-2	WBGene00004746	-1.50716	6.52311e-05	0.00043386	Oogenic only
nra-3	WBGene00007651	-1.28172	7.56144e-05	0.000497415	Oogenic only
nhr-46	WBGene00003636	-1.05863	7.74828e-05	0.000507906	Oogenic only
his-61	WBGene00001935	-1.56644	0.000103755	0.000669715	Oogenic only
T24H10.4	WBGene00012002	-1.27167	0.000111135	0.000712895	Oogenic only
C06B3.6	WBGene00007365	-1.5281	0.000130034	0.000822193	Oogenic and Spermatogenic
F17C11.4	WBGene00008915	-1.28812	0.000136689	0.000859582	Oogenic and Spermatogenic
F21A10.2	WBGene00008999	-1.07056	0.000155201	0.000970082	Oogenic only
his-62	WBGene00001936	-1.04916	0.000166755	0.0010402	Oogenic and Spermatogenic
F25E5.1	WBGene00017782	-1.25921	0.0001691	0.00105412	Oogenic only
C11H1.3	WBGene00007529	-1.57385	0.000174491	0.00108409	Oogenic only
klp-10	WBGene00002221	-1.14632	0.000189649	0.00116965	Oogenic only
W05H9.2	WBGene00021049	-1.57134	0.000204178	0.0012526	Oogenic only
mec-8	WBGene00003172	-1.30843	0.000219571	0.00133731	Oogenic only
sax-1	WBGene00004727	-1.45994	0.000239174	0.00144721	Oogenic only
gst-7	WBGene00001755	-1.34229	0.000299613	0.00178748	Oogenic and Spermatogenic
rgs-7	WBGene00004350	-1.40428	0.000329181	0.00195362	Oogenic only
flt-1	WBGene00001470	-1.41526	0.000331342	0.00196441	Oogenic only
sqv-4	WBGene00005022	-1.0282	0.000339164	0.00200645	Oogenic only
scl-2	WBGene00009895	-1.70325	0.000344	0.00202852	Spermatogenic only
sec-3	WBGene00018703	-1.40349	0.000358989	0.00210895	Oogenic only
pek-1	WBGene00003970	-1.26634	0.000376169	0.00219874	Oogenic only
Y106G6H.6	WBGene00013719	-1.17425	0.000385019	0.00224623	Oogenic only
puf-10	WBGene00004246	-1.00533	0.000394474	0.0022951	Oogenic only
hda-4	WBGene00001837	-1.00787	0.00039904	0.00231783	Oogenic only
F18H3.4	WBGene00008940	-1.6117	0.000406152	0.00235472	Oogenic only
mig-2	WBGene00003239	-1.11519	0.000407782	0.00236269	Oogenic only
Y37E11B.3	WBGene00021376	-1.25913	0.000442448	0.00254449	Oogenic only
oga-1	WBGene00020596	-1.32116	0.000515882	0.00292333	Oogenic only
tag-209	WBGene00011072	-1.0512	0.000532293	0.00300898	Spermatogenic only
W06B4.1	WBGene00021056	-1.46594	0.000594345	0.00333336	Oogenic only
rab-6.2	WBGene00004270	-1.03353	0.000617385	0.00345631	Oogenic only
C31E10.5	WBGene00007846	-1.07468	0.000637249	0.00356107	Oogenic only
lst-2	WBGene00003084	-1.08028	0.000638616	0.00356657	Oogenic only
sek-3	WBGene00022613	-1.15282	0.000670754	0.00372588	Oogenic only
ceh-39	WBGene00000460	-1.48701	0.000676704	0.00375159	Oogenic only
C04F12.1	WBGene00007297	-1.03546	0.000708855	0.00390481	Oogenic only
T28H10.3	WBGene00012144	-1.041	0.0007673	0.00420182	Spermatogenic only
ags-3	WBGene00000092	-1.31957	0.000837374	0.00455331	Oogenic only
B0513.4	WBGene00007196	-1.0658	0.000885089	0.00479591	Oogenic and Spermatogenic
nck-1	WBGene00006410	-1.14304	0.000959533	0.00515416	Oogenic only
T12G3.2	WBGene00011738	-1.0578	0.00121533	0.00639857	Oogenic only
K09H9.2	WBGene00019595	-1.17582	0.00128193	0.00671116	Oogenic only
F48F7.6	WBGene00009851	-1.17917	0.00152428	0.00785582	Oogenic only
pmk-1	WBGene00004055	-1.10819	0.00167488	0.00855597	Oogenic only
ldb-1	WBGene00002261	-1.06638	0.00174562	0.00889288	Oogenic only
F34H10.3	WBGene00009380	-1.23006	0.001841	0.00931236	Oogenic only
bet-2	WBGene00010199	-1.00851	0.00189874	0.00958875	Oogenic only

## Sheet: SP enriched P<0.05
Gene name	Wormbase ID	log2 fold enrichment SP/OO (FBF iCLIP)	Unadjusted p value	BH-corrected p value	Program (Noble et al. 2016)
snpc-1.3	WBGene00017265	4.706	1.1614e-92	3.59337e-89	Oogenic and Spermatogenic
fog-1	WBGene00001481	3.08241	3.18798e-81	7.39771e-78	Oogenic and Spermatogenic
ZK484.5	WBGene00022751	4.97277	3.4445e-79	6.39437e-76	Spermatogenic only
F58F12.2	WBGene00019062	5.29232	2.14297e-54	2.84157e-51	Spermatogenic only
msp-64	WBGene00003457	4.72259	1.30877e-47	1.34978e-44	Spermatogenic only
gska-3	WBGene00007977	5.25873	8.09337e-46	6.82934e-43	Spermatogenic only
moa-1	WBGene00020116	5.42662	5.56244e-45	4.30255e-42	Spermatogenic only
W02B12.12	WBGene00012207	5.44747	2.90842e-41	2.07661e-38	Spermatogenic only
msp-76	WBGene00003463	4.0583	1.51533e-40	1.00466e-37	Spermatogenic only
F49C12.15	WBGene00009884	4.42493	1.91888e-40	1.18741e-37	Spermatogenic only
ZK973.8	WBGene00022834	4.99192	6.07414e-40	3.52376e-37	Oogenic and Spermatogenic
gipc-1	WBGene00016440	4.90144	8.18209e-40	4.46742e-37	Spermatogenic only
W03D8.9	WBGene00020990	5.00092	6.36611e-37	3.11001e-34	Spermatogenic only
F32B5.4	WBGene00017978	4.49761	1.60347e-36	7.44171e-34	Spermatogenic only
ssq-2	WBGene00006051	4.1328	1.18064e-35	4.76466e-33	Spermatogenic only
F17E9.5	WBGene00017542	4.92931	9.17335e-33	3.27489e-30	Spermatogenic only
R09E10.6	WBGene00011176	4.37281	9.93221e-33	3.41447e-30	Spermatogenic only
C04G2.9	WBGene00007308	5.69182	9.69402e-32	2.99933e-29	Spermatogenic only
ssq-4	WBGene00006053	5.03945	4.93127e-31	1.43038e-28	Spermatogenic only
gipc-2	WBGene00009681	4.30182	5.52687e-31	1.55456e-28	Spermatogenic only
F32A11.3	WBGene00009308	4.51133	9.46586e-31	2.58418e-28	Oogenic and Spermatogenic
Y69E1A.2	WBGene00013474	4.82197	2.0657e-30	5.32607e-28	Spermatogenic only
F21F3.3	WBGene00017673	5.95162	2.97e-30	7.45068e-28	Spermatogenic only
spe-15	WBGene00004969	3.38699	1.05519e-29	2.57744e-27	Oogenic and Spermatogenic
T10E9.4	WBGene00020414	5.30937	1.93841e-29	4.38836e-27	Oogenic and Spermatogenic
F42G4.2	WBGene00009641	5.77245	2.04955e-29	4.5295e-27	Oogenic and Spermatogenic
glo-4	WBGene00017195	2.81751	2.5389e-29	5.48047e-27	Oogenic and Spermatogenic
ZK550.5	WBGene00013999	4.68251	5.39451e-29	1.138e-26	Spermatogenic only
C09H10.9	WBGene00007503	5.83419	7.20649e-29	1.48646e-26	Spermatogenic only
C17F3.1	WBGene00015907	5.66979	8.48682e-29	1.67606e-26	Spermatogenic only
ssq-1	WBGene00006050	4.73624	2.16761e-28	4.10608e-26	Oogenic and Spermatogenic
W03F11.4	WBGene00021007	5.54513	2.61475e-28	4.85403e-26	Spermatogenic only
msp-59	WBGene00003452	4.05315	4.05124e-28	7.37326e-26	Oogenic and Spermatogenic
Y69A2AR.32	WBGene00022101	2.11254	1.49671e-27	2.67163e-25	Oogenic and Spermatogenic
R11F4.1	WBGene00020007	2.68509	2.02751e-27	3.55082e-25	Spermatogenic only
nspd-1	WBGene00022754	4.15472	2.33731e-27	4.01758e-25	Oogenic and Spermatogenic
F47D12.7	WBGene00018563	4.98902	4.48101e-26	7.17117e-24	Spermatogenic only
catp-4	WBGene00007248	5.12412	7.50729e-26	1.18106e-23	Spermatogenic only
F13D12.9	WBGene00008743	4.35412	3.11614e-25	4.74163e-23	Spermatogenic only
F27C8.5	WBGene00009185	6.08646	4.17923e-25	6.1574e-23	Spermatogenic only
Y38C1AA.7	WBGene00021398	4.44825	7.79534e-25	1.13057e-22	Spermatogenic only
msd-4	WBGene00016447	4.7162	9.76614e-25	1.37347e-22	Spermatogenic only
Y69A2AR.19	WBGene00022090	5.40154	1.09321e-24	1.51451e-22	Spermatogenic only
T05F1.5	WBGene00011491	4.98513	3.41395e-24	4.5269e-22	Spermatogenic only
ssp-16	WBGene00006044	5.65708	5.63203e-24	7.26062e-22	Spermatogenic only
C34C12.4	WBGene00007923	2.05019	7.45635e-24	9.35268e-22	Oogenic and Spermatogenic
Y38E10A.17	WBGene00012595	4.64755	1.13184e-23	1.38234e-21	Spermatogenic only
F27C1.1	WBGene00017851	3.97854	3.60874e-23	4.35018e-21	Spermatogenic only
snf-5	WBGene00004904	4.85252	4.52178e-23	5.38092e-21	Spermatogenic only
nspd-2	WBGene00010633	4.6367	1.68177e-22	1.97597e-20	Oogenic and Spermatogenic
D1081.12	WBGene00086554	5.19847	1.91981e-22	2.19996e-20	Spermatogenic only
C56G2.5	WBGene00016980	3.31413	1.97836e-22	2.21243e-20	Oogenic and Spermatogenic
F52F12.5	WBGene00009938	6.13657	1.97807e-22	2.21243e-20	Spermatogenic only
Y38H8A.3	WBGene00012637	5.39612	2.52615e-22	2.7914e-20	Spermatogenic only
C44B9.2	WBGene00008079	4.84046	3.21927e-22	3.43463e-20	Spermatogenic only
Y92H12A.2	WBGene00022358	2.71198	5.45535e-22	5.6895e-20	Oogenic and Spermatogenic
C35E7.10	WBGene00016462	5.22359	5.5882e-22	5.7633e-20	Spermatogenic only
B0218.7	WBGene00015051	5.19017	7.9237e-22	8.08217e-20	Spermatogenic only
Y113G7C.1	WBGene00013771	5.27468	2.24714e-21	2.24279e-19	Spermatogenic only
K06A5.2	WBGene00019430	4.73859	2.41227e-21	2.38198e-19	Spermatogenic only
pitr-5	WBGene00017312	5.32481	4.36985e-21	4.26957e-19	Oogenic and Spermatogenic
R12C12.1	WBGene00020022	1.81658	8.37771e-21	8.01669e-19	Spermatogenic only
F07A5.2	WBGene00008541	5.21976	1.80547e-20	1.67583e-18	Spermatogenic only
T16A9.5	WBGene00011795	5.13839	3.61777e-20	3.32477e-18	Spermatogenic only
ZC434.8	WBGene00013894	2.26728	3.78987e-20	3.44878e-18	Oogenic and Spermatogenic
F08H9.2	WBGene00008590	4.09411	3.98152e-20	3.588e-18	Spermatogenic only
K04G2.4	WBGene00010563	5.50759	4.53603e-20	4.04841e-18	Spermatogenic only
ant-1.4	WBGene00020140	6.85506	5.19345e-20	4.59101e-18	Spermatogenic only
rmd-3	WBGene00007190	4.56426	7.55296e-20	6.61383e-18	Spermatogenic only
msp-81	WBGene00003467	4.85239	1.06853e-19	9.26925e-18	Spermatogenic only
R10E9.2	WBGene00011214	4.73434	2.06179e-19	1.772e-17	Spermatogenic only
F58E6.5	WBGene00010254	5.73177	3.06229e-19	2.60772e-17	Spermatogenic only
fer-1	WBGene00001414	5.31456	3.81923e-19	3.16518e-17	Oogenic and Spermatogenic
E03H12.5	WBGene00017112	5.65357	3.87048e-19	3.17928e-17	Spermatogenic only
F53B6.4	WBGene00009959	4.26016	4.1679e-19	3.39355e-17	Spermatogenic only
C34D4.3	WBGene00016399	4.63233	4.43011e-19	3.57568e-17	Oogenic and Spermatogenic
T27A3.4	WBGene00020840	4.7333	9.99383e-19	7.92844e-17	Spermatogenic only
K07H8.9	WBGene00019509	1.87105	1.1817e-18	9.29537e-17	Oogenic and Spermatogenic
T23B3.5	WBGene00020713	5.2011	1.71593e-18	1.33842e-16	Spermatogenic only
ant-1.3	WBGene00010485	5.25318	3.70332e-18	2.81756e-16	Spermatogenic only
spe-41	WBGene00004976	3.03716	4.73556e-18	3.57362e-16	Oogenic and Spermatogenic
kel-10	WBGene00002186	4.73369	6.05295e-18	4.53093e-16	Spermatogenic only
ssp-10	WBGene00006039	5.16723	6.2423e-18	4.63529e-16	Spermatogenic only
C33F10.1	WBGene00016351	5.50459	6.41388e-18	4.72489e-16	Spermatogenic only
F01D5.8	WBGene00008498	4.51237	9.11192e-18	6.65959e-16	Spermatogenic only
R05D3.3	WBGene00019878	2.24827	9.87685e-18	7.16226e-16	Spermatogenic only
crh-2	WBGene00016162	1.29475	1.33903e-17	9.48768e-16	Oogenic only
C06C3.10	WBGene00044169	6.3653	2.91568e-17	2.00469e-15	Spermatogenic only
spe-4	WBGene00004958	4.82919	3.27674e-17	2.23637e-15	Spermatogenic only
C09D4.3	WBGene00015634	6.37539	3.50048e-17	2.37164e-15	Spermatogenic only
R06B10.1	WBGene00019912	4.6546	3.57184e-17	2.40245e-15	Spermatogenic only
F58A6.9	WBGene00019026	5.38572	4.57261e-17	3.05345e-15	Spermatogenic only
nspd-7	WBGene00012781	5.30437	8.63606e-17	5.6851e-15	Spermatogenic only
F32H2.7	WBGene00009344	4.96355	1.18894e-16	7.77166e-15	Spermatogenic only
sams-5	WBGene00006416	5.27365	1.69847e-16	1.07981e-14	Oogenic and Spermatogenic
C04F12.7	WBGene00007301	4.1246	1.7545e-16	1.10784e-14	Spermatogenic only
glct-6	WBGene00019546	3.7067	2.82655e-16	1.7727e-14	Oogenic and Spermatogenic
C10G11.8	WBGene00015688	4.94457	3.01118e-16	1.87582e-14	Spermatogenic only
msp-40	WBGene00003435	6.16778	3.10061e-16	1.91866e-14	Oogenic and Spermatogenic
smz-1	WBGene00007733	5.2582	3.25814e-16	2.00278e-14	Spermatogenic only
gsp-3	WBGene00021113	5.65125	4.29377e-16	2.58797e-14	Spermatogenic only
C18E9.8	WBGene00007688	5.62077	4.56283e-16	2.7324e-14	Spermatogenic only
T14G10.8	WBGene00011777	3.73305	5.97628e-16	3.53324e-14	Oogenic and Spermatogenic
C17H12.12	WBGene00015937	3.75344	8.36585e-16	4.85324e-14	Spermatogenic only
C39H7.1	WBGene00016541	4.89466	1.11108e-15	6.40563e-14	Spermatogenic only
T08B6.4	WBGene00020353	4.628	1.16919e-15	6.69902e-14	Spermatogenic only
C15C6.2	WBGene00007601	4.85729	1.20573e-15	6.86601e-14	Oogenic and Spermatogenic
C35A11.2	WBGene00016429	7.6598	1.51818e-15	8.48902e-14	Spermatogenic only
ssq-3	WBGene00006052	4.11313	1.58897e-15	8.83164e-14	Spermatogenic only
sss-1	WBGene00006056	4.39386	1.73363e-15	9.57833e-14	Spermatogenic only
irld-1	WBGene00044529	4.06708	1.764e-15	9.68843e-14	Spermatogenic only
T27A3.5	WBGene00020841	5.12791	1.81772e-15	9.92473e-14	Spermatogenic only
Y26E6A.3	WBGene00012514	2.48286	2.22854e-15	1.20966e-13	Oogenic and Spermatogenic
B0205.10	WBGene00015024	5.57194	2.37052e-15	1.27926e-13	Spermatogenic only
nhx-8	WBGene00003735	2.22469	2.39243e-15	1.28361e-13	Oogenic and Spermatogenic
K08C9.2	WBGene00010651	4.0244	2.6735e-15	1.41802e-13	Spermatogenic only
K08F4.5	WBGene00010679	5.48278	3.05253e-15	1.60986e-13	Spermatogenic only
msp-31	WBGene00003429	5.08738	3.10357e-15	1.62753e-13	Spermatogenic only
Y69E1A.1	WBGene00013473	5.93782	3.47354e-15	1.80119e-13	Spermatogenic only
C05B5.2	WBGene00007320	5.43459	3.65375e-15	1.87395e-13	Spermatogenic only
T27E7.1	WBGene00012087	4.15881	3.65422e-15	1.87395e-13	Spermatogenic only
F37A4.4	WBGene00018134	5.92385	4.03288e-15	2.04553e-13	Spermatogenic only
R07E5.15	WBGene00011120	5.14298	4.54389e-15	2.29219e-13	Spermatogenic only
C04G2.3	WBGene00014665	5.46798	4.85356e-15	2.43517e-13	Spermatogenic only
msp-50	WBGene00003443	4.75068	4.92266e-15	2.45657e-13	Oogenic and Spermatogenic
C50C3.2	WBGene00016800	4.81	4.96379e-15	2.46384e-13	Spermatogenic only
F40G12.10	WBGene00009605	5.50283	5.29726e-15	2.61538e-13	Spermatogenic only
msp-152	WBGene00003470	5.40095	5.88501e-15	2.87498e-13	Oogenic and Spermatogenic
C35E7.9	WBGene00016461	4.17588	5.93683e-15	2.88511e-13	Spermatogenic only
abt-1	WBGene00000019	4.18491	6.0499e-15	2.92475e-13	Spermatogenic only
D1086.17	WBGene00045355	5.89691	6.677e-15	3.21119e-13	Spermatogenic only
C10G11.9	WBGene00015689	5.48961	7.39972e-15	3.52227e-13	Spermatogenic only
Y59E9AL.2	WBGene00043743	5.44735	7.59307e-15	3.57761e-13	Spermatogenic only
msp-77	WBGene00003464	4.62397	7.56366e-15	3.57761e-13	Spermatogenic only
K09F6.3	WBGene00019586	5.05423	8.91581e-15	4.15862e-13	Spermatogenic only
spe-11	WBGene00004965	4.45981	1.38556e-14	6.33533e-13	Spermatogenic only
ZK938.1	WBGene00014158	4.43695	1.37954e-14	6.33533e-13	Spermatogenic only
Y59E9AL.6	WBGene00021996	5.01912	1.75701e-14	7.95539e-13	Spermatogenic only
Y43F8A.2	WBGene00012809	4.24412	2.02958e-14	9.09365e-13	Spermatogenic only
acs-18	WBGene00011173	4.6929	2.03779e-14	9.09365e-13	Spermatogenic only
R105.1	WBGene00020084	5.84699	2.52081e-14	1.11953e-12	Spermatogenic only
hcp-2	WBGene00001830	1.17189	3.88623e-14	1.71771e-12	Oogenic and Spermatogenic
T05A7.6	WBGene00020223	4.64415	4.67267e-14	2.05553e-12	Spermatogenic only
sss-2	WBGene00006057	4.5966	5.10292e-14	2.23421e-12	Spermatogenic only
H05L14.1	WBGene00010366	4.86976	5.28345e-14	2.30239e-12	Spermatogenic only
K04H4.5	WBGene00010574	5.74379	5.9914e-14	2.5987e-12	Spermatogenic only
ncr-2	WBGene00003562	4.44488	6.02022e-14	2.59905e-12	Spermatogenic only
msp-3	WBGene00003424	5.302	6.35876e-14	2.71991e-12	Spermatogenic only
F46A9.1	WBGene00009754	5.69816	6.48022e-14	2.75915e-12	Spermatogenic only
clec-73	WBGene00021579	5.2678	6.59099e-14	2.7935e-12	Spermatogenic only
C14C10.1	WBGene00007584	3.75597	7.10366e-14	2.98354e-12	Oogenic and Spermatogenic
F55H12.5	WBGene00010136	4.85159	7.08249e-14	2.98354e-12	Oogenic and Spermatogenic
T23G11.1	WBGene00011968	5.6866	7.22239e-14	3.01974e-12	Spermatogenic only
msp-36	WBGene00003432	4.16569	7.56227e-14	3.14767e-12	Spermatogenic only
nspa-8	WBGene00012294	4.8653	9.1513e-14	3.74195e-12	Spermatogenic only
C38C3.3	WBGene00016512	4.04736	1.10633e-13	4.50392e-12	Spermatogenic only
mboa-4	WBGene00007446	4.31364	1.14791e-13	4.65278e-12	Spermatogenic only
F21H7.5	WBGene00009031	4.36239	1.28676e-13	5.17044e-12	Spermatogenic only
msp-49	WBGene00003442	3.38242	1.40945e-13	5.6148e-12	Oogenic and Spermatogenic
ZK354.2	WBGene00022705	3.9581	1.44914e-13	5.74827e-12	Spermatogenic only
msp-142	WBGene00003469	4.78528	1.57743e-13	6.20413e-12	Spermatogenic only
ZK622.1	WBGene00022780	5.67967	1.62156e-13	6.35075e-12	Spermatogenic only
tbx-34	WBGene00006553	5.58324	1.64368e-13	6.41036e-12	Spermatogenic only
cyn-2	WBGene00000878	4.09876	1.79165e-13	6.90045e-12	Spermatogenic only
smz-2	WBGene00020661	3.81047	1.87315e-13	7.18452e-12	Spermatogenic only
cyc-2.2	WBGene00013854	5.17335	2.07737e-13	7.93504e-12	Spermatogenic only
C33F10.11	WBGene00016357	4.54273	2.31472e-13	8.80542e-12	Oogenic and Spermatogenic
Y106G6H.13	WBGene00013723	4.80559	2.34551e-13	8.88613e-12	Spermatogenic only
C17H12.3	WBGene00015929	5.17992	2.46561e-13	9.30316e-12	Spermatogenic only
acdh-5	WBGene00016491	5.64176	2.48332e-13	9.33204e-12	Spermatogenic only
Y54F10BM.3	WBGene00021858	2.83137	2.61202e-13	9.77611e-12	Spermatogenic only
spe-44	WBGene00007732	1.83106	3.27385e-13	1.21067e-11	Oogenic and Spermatogenic
nspd-3	WBGene00016058	5.06929	3.81125e-13	1.40381e-11	Spermatogenic only
nhr-23	WBGene00003622	1.06679	3.8665e-13	1.41853e-11	Oogenic and Spermatogenic
Y69A2AR.8	WBGene00022079	5.08326	4.29755e-13	1.56431e-11	Spermatogenic only
F07F6.1	WBGene00017215	4.74038	4.84533e-13	1.75681e-11	Spermatogenic only
acs-10	WBGene00007082	5.10323	4.89822e-13	1.76908e-11	Spermatogenic only
C01G12.9	WBGene00007249	5.67832	4.96193e-13	1.77825e-11	Spermatogenic only
clec-79	WBGene00018548	5.05346	5.06806e-13	1.8093e-11	Spermatogenic only
msp-33	WBGene00003431	5.05777	5.57819e-13	1.98378e-11	Spermatogenic only
cpb-2	WBGene00000771	5.07375	6.87844e-13	2.42759e-11	Spermatogenic only
acdh-8	WBGene00019406	6.94257	6.95628e-13	2.44576e-11	Spermatogenic only
ssp-11	WBGene00006040	4.47328	7.05751e-13	2.47199e-11	Spermatogenic only
T25B9.6	WBGene00012012	6.06257	7.34107e-13	2.56165e-11	Spermatogenic only
F34D10.8	WBGene00009377	3.99205	7.84802e-13	2.72829e-11	Spermatogenic only
Y37E11B.10	WBGene00021381	5.03782	9.59088e-13	3.32174e-11	Spermatogenic only
Y57G7A.6	WBGene00021969	4.38674	1.1308e-12	3.87311e-11	Spermatogenic only
osta-1	WBGene00015287	6.09945	1.25521e-12	4.28339e-11	Spermatogenic only
spe-46	WBGene00012296	5.51722	1.36403e-12	4.63771e-11	Spermatogenic only
apm-1	WBGene00000150	2.16331	1.68909e-12	5.70113e-11	Oogenic and Spermatogenic
F36A2.10	WBGene00009457	4.97993	1.96852e-12	6.62022e-11	Spermatogenic only
msp-56	WBGene00003449	4.94082	2.27145e-12	7.61142e-11	Spermatogenic only
C33F10.12	WBGene00016358	4.65013	2.82108e-12	9.35187e-11	Oogenic and Spermatogenic
ttr-9	WBGene00007888	5.90686	3.78667e-12	1.22895e-10	Spermatogenic only
F32B4.2	WBGene00009313	4.90575	3.96812e-12	1.27889e-10	Spermatogenic only
clec-151	WBGene00008659	4.33573	4.55152e-12	1.46184e-10	Spermatogenic only
D2092.1	WBGene00017063	2.77764	4.62677e-12	1.48089e-10	Spermatogenic only
Y54G2A.26	WBGene00021890	1.12261	4.93474e-12	1.56864e-10	Oogenic and Spermatogenic
K10D2.8	WBGene00189952	3.29762	4.92009e-12	1.56864e-10	Spermatogenic only
nspd-5	WBGene00017386	4.90735	5.27841e-12	1.67216e-10	Spermatogenic only
msp-38	WBGene00003434	4.2732	5.84941e-12	1.84048e-10	Spermatogenic only
irld-3	WBGene00017175	6.69059	7.09959e-12	2.2263e-10	Oogenic and Spermatogenic
C28A5.6	WBGene00007791	4.62932	7.59455e-12	2.37349e-10	Spermatogenic only
osta-2	WBGene00015942	2.11769	7.72373e-12	2.40576e-10	Oogenic and Spermatogenic
cpb-1	WBGene00000770	1.28474	7.76029e-12	2.40906e-10	Oogenic and Spermatogenic
C28D4.7	WBGene00007794	5.28293	7.81267e-12	2.41724e-10	Spermatogenic only
K02F6.3	WBGene00019337	4.55357	7.99601e-12	2.46574e-10	Spermatogenic only
nspd-6	WBGene00043147	4.28355	8.20983e-12	2.5233e-10	Spermatogenic only
T02E1.7	WBGene00011379	5.80109	8.50625e-12	2.58869e-10	Spermatogenic only
tag-335	WBGene00016583	1.22134	8.50551e-12	2.58869e-10	Oogenic only
F13A7.1	WBGene00008724	4.85701	8.82452e-12	2.67677e-10	Spermatogenic only
swt-1	WBGene00019300	2.47046	9.47663e-12	2.85504e-10	Spermatogenic only
Y38F1A.1	WBGene00012605	4.08927	1.15244e-11	3.41754e-10	Spermatogenic only
Y106G6D.3	WBGene00013700	5.20895	1.33091e-11	3.90935e-10	Spermatogenic only
elo-7	WBGene00001245	5.80662	1.34356e-11	3.93405e-10	Spermatogenic only
K11C4.1	WBGene00019642	4.50282	1.36677e-11	3.98942e-10	Spermatogenic only
F20H11.4	WBGene00017647	4.20847	1.40656e-11	4.0927e-10	Spermatogenic only
B0393.4	WBGene00007169	8.12058	1.64757e-11	4.7641e-10	Spermatogenic only
C06A8.6	WBGene00015516	4.2516	1.95267e-11	5.59403e-10	Oogenic and Spermatogenic
F32B6.4	WBGene00009321	4.79356	2.01315e-11	5.74955e-10	Spermatogenic only
ZK512.8	WBGene00013987	4.19349	2.0309e-11	5.78246e-10	Spermatogenic only
ZK265.3	WBGene00013956	5.75851	2.21556e-11	6.2771e-10	Spermatogenic only
cdr-4	WBGene00010470	2.46452	2.21815e-11	6.2771e-10	Oogenic and Spermatogenic
acs-6	WBGene00022849	4.47971	2.28292e-11	6.44075e-10	Spermatogenic only
clec-123	WBGene00021288	4.41198	2.38381e-11	6.705e-10	Spermatogenic only
ZK858.2	WBGene00014116	4.79351	2.54761e-11	7.12257e-10	Spermatogenic only
C27A7.5	WBGene00007756	1.81034	2.72132e-11	7.56266e-10	Oogenic and Spermatogenic
abt-5	WBGene00000023	4.13884	2.98206e-11	8.26254e-10	Spermatogenic only
C36H8.1	WBGene00007987	4.73576	3.09398e-11	8.54712e-10	Spermatogenic only
K05F1.9	WBGene00019410	5.71618	3.32703e-11	9.16366e-10	Spermatogenic only
F27E5.3	WBGene00009193	7.98119	4.13599e-11	1.12581e-09	Spermatogenic only
C42C1.3	WBGene00016581	4.16157	4.19134e-11	1.13754e-09	Spermatogenic only
K01H12.4	WBGene00010486	4.4187	4.23718e-11	1.14663e-09	Spermatogenic only
T13F2.9	WBGene00011748	4.68828	4.93729e-11	1.32466e-09	Spermatogenic only
wago-10	WBGene00020707	6.42171	4.93788e-11	1.32466e-09	Spermatogenic only
Y105E8A.27	WBGene00013684	7.3175	5.20699e-11	1.39283e-09	Spermatogenic only
mpst-4	WBGene00017387	5.1517	5.35203e-11	1.42752e-09	Spermatogenic only
C17H12.5	WBGene00015931	4.40826	5.58821e-11	1.48624e-09	Spermatogenic only
best-6	WBGene00015628	7.29147	5.69276e-11	1.50972e-09	Spermatogenic only
F54F12.1	WBGene00010072	4.38526	6.39945e-11	1.68749e-09	Spermatogenic only
C42C1.9	WBGene00016587	3.75688	6.7671e-11	1.77938e-09	Spermatogenic only
ssp-34	WBGene00013858	6.33485	6.93691e-11	1.81888e-09	Spermatogenic only
T22C1.8	WBGene00011918	5.58868	7.70872e-11	2.0099e-09	Oogenic and Spermatogenic
ZK945.7	WBGene00014169	5.56359	8.46439e-11	2.20074e-09	Spermatogenic only
C27D6.3	WBGene00016161	3.9588	8.70406e-11	2.25673e-09	Spermatogenic only
wht-6	WBGene00007060	3.35456	9.11754e-11	2.35736e-09	Spermatogenic only
C41G7.6	WBGene00008063	4.63382	9.14968e-11	2.35909e-09	Spermatogenic only
F25F2.1	WBGene00009115	5.02366	9.26447e-11	2.38207e-09	Oogenic and Spermatogenic
T05C12.1	WBGene00011466	5.04279	1.0193e-10	2.61358e-09	Spermatogenic only
nspd-10	WBGene00020860	4.74563	1.19609e-10	3.04168e-09	Spermatogenic only
F48F5.2	WBGene00009846	6.35568	1.24144e-10	3.1398e-09	Spermatogenic only
Y106G6A.4	WBGene00013696	5.50237	1.27683e-10	3.22053e-09	Spermatogenic only
F31E8.5	WBGene00017955	6.24865	1.48224e-10	3.72849e-09	Oogenic and Spermatogenic
ent-3	WBGene00010510	7.15789	1.5042e-10	3.77352e-09	Spermatogenic only
F01G10.5	WBGene00008508	4.97636	1.57899e-10	3.93985e-09	Spermatogenic only
des-2	WBGene00000955	2.96718	1.66524e-10	4.13283e-09	Spermatogenic only
ZK688.10	WBGene00044447	5.51967	1.84581e-10	4.56876e-09	Spermatogenic only
rnh-1.1	WBGene00022888	4.96741	1.89096e-10	4.66805e-09	Spermatogenic only
ZK637.12	WBGene00014029	5.46872	1.96552e-10	4.83925e-09	Spermatogenic only
btb-2	WBGene00020802	5.47518	2.12394e-10	5.17438e-09	Spermatogenic only
F36A2.14	WBGene00023490	5.50894	2.26579e-10	5.49114e-09	Oogenic and Spermatogenic
F26B1.8	WBGene00194703	4.65158	2.46082e-10	5.94826e-09	Spermatogenic only
C07G1.6	WBGene00015572	5.42287	2.83205e-10	6.81014e-09	Spermatogenic only
ZC477.7	WBGene00022621	4.97216	2.84208e-10	6.81658e-09	Spermatogenic only
F55C12.1	WBGene00018869	1.4312	2.8994e-10	6.91831e-09	Oogenic and Spermatogenic
msp-45	WBGene00003438	3.98431	2.93097e-10	6.9757e-09	Spermatogenic only
ZK686.5	WBGene00022795	6.18106	3.38903e-10	7.98401e-09	Spermatogenic only
aman-3	WBGene00018594	3.65109	3.53373e-10	8.29765e-09	Spermatogenic only
F56F4.3	WBGene00018980	6.15571	3.86278e-10	8.98604e-09	Spermatogenic only
F36A2.12	WBGene00009459	5.35282	4.42437e-10	1.01903e-08	Oogenic and Spermatogenic
tbc-3	WBGene00009322	1.11465	4.91825e-10	1.12719e-08	Oogenic only
C34D4.2	WBGene00016398	4.81933	5.84365e-10	1.32618e-08	Spermatogenic only
R10F2.6	WBGene00019997	3.36886	5.99127e-10	1.35636e-08	Oogenic and Spermatogenic
C02F5.5	WBGene00015348	5.32251	6.42129e-10	1.45018e-08	Oogenic and Spermatogenic
F26F4.2	WBGene00005012	7.50122	6.6007e-10	1.48708e-08	Oogenic and Spermatogenic
frk-1	WBGene00001487	5.34543	6.89346e-10	1.54928e-08	Spermatogenic only
C09B9.2	WBGene00015627	6.06118	7.17747e-10	1.60737e-08	Spermatogenic only
C24D10.2	WBGene00016054	4.83276	7.34252e-10	1.6383e-08	Spermatogenic only
spe-26	WBGene00004972	4.45469	7.37382e-10	1.63922e-08	Spermatogenic only
Y71G12B.27	WBGene00022162	5.32939	7.78633e-10	1.71669e-08	Spermatogenic only
B0244.9	WBGene00015084	6.03334	8.52668e-10	1.87103e-08	Spermatogenic only
F56A11.6	WBGene00018926	4.82286	8.7614e-10	1.918e-08	Spermatogenic only
oac-9	WBGene00016753	4.81481	8.78258e-10	1.91812e-08	Spermatogenic only
C01G10.1	WBGene00007230	4.43866	9.4803e-10	2.0608e-08	Spermatogenic only
F56F3.4	WBGene00010155	5.27155	1.00188e-09	2.15811e-08	Spermatogenic only
R11E3.1	WBGene00020003	4.13772	1.0021e-09	2.15811e-08	Spermatogenic only
C52E4.7	WBGene00008259	5.35537	1.00066e-09	2.15811e-08	Oogenic and Spermatogenic
ZK856.18	WBGene00194912	4.85216	9.95574e-10	2.15811e-08	Spermatogenic only
C05C12.5	WBGene00007337	7.42703	1.02053e-09	2.19272e-08	Spermatogenic only
kin-5	WBGene00002193	5.25878	1.05672e-09	2.26001e-08	Spermatogenic only
T28H11.7	WBGene00020905	4.76835	1.075e-09	2.29383e-08	Spermatogenic only
F36A4.4	WBGene00018083	4.85449	1.10286e-09	2.3425e-08	Spermatogenic only
C32E8.4	WBGene00016322	5.30069	1.11415e-09	2.36108e-08	Oogenic and Spermatogenic
W01B6.2	WBGene00012169	5.95029	1.26538e-09	2.67545e-08	Spermatogenic only
C30G7.3	WBGene00044177	5.94694	1.31359e-09	2.77108e-08	Spermatogenic only
F37A4.5	WBGene00018135	5.24875	1.38112e-09	2.90693e-08	Spermatogenic only
hdl-2	WBGene00006409	6.81815	1.50152e-09	3.13899e-08	Spermatogenic only
ZK484.7	WBGene00022753	6.79508	1.51412e-09	3.15821e-08	Spermatogenic only
T22B3.3	WBGene00011911	4.70918	1.55551e-09	3.23727e-08	Oogenic and Spermatogenic
spe-47	WBGene00021271	4.3351	1.58779e-09	3.29706e-08	Spermatogenic only
C50E10.2	WBGene00016826	4.70501	1.60603e-09	3.3275e-08	Spermatogenic only
fut-1	WBGene00001505	2.68963	1.68781e-09	3.48139e-08	Spermatogenic only
W10C8.5	WBGene00021128	1.78905	1.70195e-09	3.48731e-08	Oogenic and Spermatogenic
gst-5	WBGene00001753	2.26647	1.69734e-09	3.48731e-08	Oogenic and Spermatogenic
C49C3.20	WBGene00185097	5.24259	1.71714e-09	3.51069e-08	Spermatogenic only
K07F5.6	WBGene00010634	7.35642	1.79748e-09	3.66685e-08	Spermatogenic only
C43G2.3	WBGene00016612	7.34175	1.80382e-09	3.67172e-08	Spermatogenic only
C34F11.5	WBGene00016416	6.77027	1.85346e-09	3.73996e-08	Spermatogenic only
Y55B1BR.2	WBGene00021912	1.80564	1.84604e-09	3.73996e-08	Oogenic and Spermatogenic
F42A9.7	WBGene00018336	4.1523	1.85229e-09	3.73996e-08	Spermatogenic only
C08F8.6	WBGene00007448	5.22121	1.90877e-09	3.84321e-08	Spermatogenic only
msd-2	WBGene00009682	4.05752	2.00921e-09	4.03668e-08	Oogenic and Spermatogenic
gln-2	WBGene00001603	6.71213	2.13235e-09	4.27484e-08	Spermatogenic only
C35A5.4	WBGene00007948	6.74428	2.20471e-09	4.41037e-08	Spermatogenic only
sma-1	WBGene00004855	1.15484	2.21055e-09	4.41254e-08	Oogenic and Spermatogenic
ZK418.2	WBGene00022732	4.39147	2.49518e-09	4.94878e-08	Spermatogenic only
D2062.6	WBGene00017058	5.89352	2.65709e-09	5.23634e-08	Oogenic and Spermatogenic
clp-6	WBGene00000546	2.80113	2.75042e-09	5.39734e-08	Spermatogenic only
C09B9.85	WBGene00220250	7.24779	2.97589e-09	5.82747e-08	Spermatogenic only
T23F6.3	WBGene00011951	6.65192	3.06733e-09	5.98128e-08	Spermatogenic only
R148.7	WBGene00020105	5.1359	3.10517e-09	6.04239e-08	Oogenic and Spermatogenic
Y39E4B.11	WBGene00012720	4.40958	3.13317e-09	6.08333e-08	Spermatogenic only
C01G5.4	WBGene00015306	6.66119	3.13932e-09	6.08333e-08	Oogenic and Spermatogenic
F11A10.6	WBGene00008687	1.09034	3.26135e-09	6.29353e-08	Oogenic and Spermatogenic
F34D10.9	WBGene00045484	3.65444	3.30603e-09	6.35333e-08	Spermatogenic only
C55C3.3	WBGene00016953	3.35748	3.31806e-09	6.36327e-08	Oogenic and Spermatogenic
obr-2	WBGene00008832	2.4303	3.43717e-09	6.57811e-08	Oogenic and Spermatogenic
F55C5.2	WBGene00010092	6.6454	3.55536e-09	6.7903e-08	Spermatogenic only
gei-8	WBGene00001565	1.2978	3.82938e-09	7.28366e-08	Oogenic and Spermatogenic
Y47D3A.13	WBGene00012926	5.09875	4.38977e-09	8.33249e-08	Spermatogenic only
F02C9.1	WBGene00017172	6.59141	4.7759e-09	9.04692e-08	Spermatogenic only
elo-4	WBGene00001242	5.791	4.87571e-09	9.19844e-08	Oogenic and Spermatogenic
C31H1.5	WBGene00016288	4.66896	4.96505e-09	9.32906e-08	Spermatogenic only
Y66D12A.3	WBGene00013429	4.28837	4.9974e-09	9.37088e-08	Spermatogenic only
C27D8.1	WBGene00007777	3.72181	5.09594e-09	9.53639e-08	Spermatogenic only
F38H4.4	WBGene00009548	4.06267	5.12058e-09	9.56322e-08	Oogenic and Spermatogenic
Y22D7AR.12	WBGene00021265	4.69644	5.29098e-09	9.82217e-08	Spermatogenic only
M70.3	WBGene00019785	3.73161	5.43572e-09	1.00507e-07	Spermatogenic only
C54G4.3	WBGene00008313	4.27288	5.79825e-09	1.06997e-07	Spermatogenic only
Y48B6A.5	WBGene00012979	5.05517	6.04864e-09	1.11175e-07	Oogenic and Spermatogenic
R155.3	WBGene00020117	5.03788	6.07118e-09	1.11369e-07	Spermatogenic only
W03C9.8	WBGene00012223	5.07406	6.12993e-09	1.12225e-07	Spermatogenic only
K10C9.7	WBGene00019626	7.13598	6.17979e-09	1.12915e-07	Spermatogenic only
fhod-1	WBGene00016735	2.13869	6.50979e-09	1.18246e-07	Spermatogenic only
B0280.11	WBGene00015106	4.0312	6.55514e-09	1.18837e-07	Spermatogenic only
C14B9.2	WBGene00015752	1.3713	6.73852e-09	1.21924e-07	Oogenic and Spermatogenic
mab-3	WBGene00003100	3.74459	6.80958e-09	1.2297e-07	Spermatogenic only
Y54E2A.7	WBGene00013192	6.51974	6.90955e-09	1.24504e-07	Spermatogenic only
msp-10	WBGene00003425	5.74883	7.05732e-09	1.2646e-07	Spermatogenic only
T05F1.8	WBGene00011493	4.63366	7.65213e-09	1.36591e-07	Spermatogenic only
T23F11.2	WBGene00011954	5.03129	7.83124e-09	1.39519e-07	Spermatogenic only
Y106G6G.4	WBGene00013713	4.63157	7.87641e-09	1.40055e-07	Spermatogenic only
ZK546.3	WBGene00022760	7.05866	8.294e-09	1.46638e-07	Spermatogenic only
D2062.7	WBGene00017059	5.68314	8.36562e-09	1.47533e-07	Oogenic and Spermatogenic
acp-2	WBGene00008802	2.98357	8.37642e-09	1.47533e-07	Spermatogenic only
F59A6.4	WBGene00019086	7.11277	8.53238e-09	1.49712e-07	Spermatogenic only
nspd-4	WBGene00020715	6.51256	8.90143e-09	1.55074e-07	Spermatogenic only
F54C9.14	WBGene00175035	3.77686	8.90482e-09	1.55074e-07	Spermatogenic only
H06I04.5	WBGene00019169	6.47189	9.19392e-09	1.5951e-07	Spermatogenic only
ZK1248.5	WBGene00022876	5.6339	9.62346e-09	1.66341e-07	Spermatogenic only
F57F4.1	WBGene00019015	3.89176	1.01836e-08	1.75696e-07	Spermatogenic only
Y53F4B.11	WBGene00013158	3.15994	1.10877e-08	1.90585e-07	Spermatogenic only
H38K22.7	WBGene00044912	7.00447	1.11626e-08	1.91519e-07	Spermatogenic only
T08B2.12	WBGene00020350	3.90819	1.1374e-08	1.94785e-07	Spermatogenic only
ZK1010.5	WBGene00014179	3.93253	1.14558e-08	1.95825e-07	Spermatogenic only
fog-3	WBGene00001483	4.75428	1.21075e-08	2.06206e-07	Oogenic and Spermatogenic
T27C10.8	WBGene00077519	4.54232	1.28576e-08	2.1818e-07	Spermatogenic only
cbs-2	WBGene00018783	5.62258	1.29069e-08	2.18617e-07	Oogenic and Spermatogenic
ZK1053.2	WBGene00014197	5.62455	1.29564e-08	2.19055e-07	Oogenic and Spermatogenic
M110.7	WBGene00010915	6.44106	1.29884e-08	2.19197e-07	Spermatogenic only
Y69E1A.8	WBGene00013478	5.61066	1.35318e-08	2.2754e-07	Spermatogenic only
nlp-4	WBGene00003742	5.00184	1.36797e-08	2.29612e-07	Spermatogenic only
F40H6.1	WBGene00018253	3.79796	1.38459e-08	2.31981e-07	Spermatogenic only
ZC250.5	WBGene00045306	6.4317	1.39412e-08	2.32737e-07	Spermatogenic only
Y48G1C.5	WBGene00021678	2.7385	1.39747e-08	2.32879e-07	Spermatogenic only
msp-78	WBGene00003465	4.13151	1.43355e-08	2.38463e-07	Oogenic and Spermatogenic
F44G3.7	WBGene00009708	4.25937	1.43904e-08	2.38947e-07	Spermatogenic only
F58D2.2	WBGene00010241	5.63773	1.46108e-08	2.42174e-07	Spermatogenic only
F54C8.1	WBGene00010035	4.2	1.46585e-08	2.42531e-07	Spermatogenic only
T06C10.3	WBGene00020289	6.94821	1.53071e-08	2.52813e-07	Spermatogenic only
sst-20	WBGene00006058	5.60497	1.56883e-08	2.5819e-07	Spermatogenic only
C04G2.5	WBGene00007306	4.96435	1.72395e-08	2.83217e-07	Spermatogenic only
F57H12.5	WBGene00019020	6.94911	1.73861e-08	2.8512e-07	Spermatogenic only
F02E9.3	WBGene00008529	4.92045	1.8697e-08	3.05538e-07	Spermatogenic only
R10E4.7	WBGene00011203	2.926	1.87738e-08	3.06254e-07	Oogenic and Spermatogenic
T04F3.3	WBGene00011438	4.18965	1.95727e-08	3.18726e-07	Spermatogenic only
nkb-2	WBGene00008074	6.35215	1.99846e-08	3.24864e-07	Spermatogenic only
C55A6.4	WBGene00008333	2.35436	2.00628e-08	3.25564e-07	Spermatogenic only
Y43C5B.3	WBGene00012786	5.6214	2.04814e-08	3.30949e-07	Spermatogenic only
Y69A2AR.14	WBGene00022085	6.35314	2.05373e-08	3.30949e-07	Spermatogenic only
tag-164	WBGene00006509	3.63412	2.05088e-08	3.30949e-07	Spermatogenic only
Y57G7A.5	WBGene00021968	4.97772	2.07617e-08	3.33987e-07	Spermatogenic only
esyt-2	WBGene00020443	1.80784	2.15064e-08	3.44176e-07	Oogenic and Spermatogenic
lmd-1	WBGene00009665	1.18985	2.22807e-08	3.55954e-07	Oogenic only
T08G3.4	WBGene00011617	5.53248	2.28539e-08	3.63859e-07	Spermatogenic only
F11G11.4	WBGene00017384	4.49983	2.29257e-08	3.64377e-07	Spermatogenic only
K01D12.7	WBGene00010466	4.90159	2.3e-08	3.64933e-07	Oogenic and Spermatogenic
M70.1	WBGene00019783	4.93786	2.33454e-08	3.68905e-07	Spermatogenic only
Y37D8A.5	WBGene00012547	6.31868	2.33696e-08	3.68905e-07	Spermatogenic only
F54H12.7	WBGene00044633	4.88091	2.36236e-08	3.72283e-07	Spermatogenic only
F26A3.5	WBGene00009143	5.52679	2.42526e-08	3.81546e-07	Spermatogenic only
F58A6.5	WBGene00019024	5.55058	2.47209e-08	3.87722e-07	Spermatogenic only
T03F6.6	WBGene00011401	5.5513	2.47286e-08	3.87722e-07	Spermatogenic only
col-149	WBGene00000722	2.15591	2.56679e-08	4.00419e-07	Spermatogenic only
H04J21.1	WBGene00019150	6.29898	2.58914e-08	4.02583e-07	Spermatogenic only
Y46G5A.22	WBGene00012912	4.87519	2.58934e-08	4.02583e-07	Spermatogenic only
C18H7.4	WBGene00015994	4.48067	2.63086e-08	4.08355e-07	Spermatogenic only
Y46G5A.14	WBGene00012905	4.43643	2.65264e-08	4.10363e-07	Spermatogenic only
F21H7.2	WBGene00009028	5.50864	2.68038e-08	4.13965e-07	Spermatogenic only
pme-5	WBGene00004053	1.35625	2.70176e-08	4.16574e-07	Oogenic and Spermatogenic
R09E10.2	WBGene00011172	4.44602	2.96502e-08	4.55651e-07	Oogenic and Spermatogenic
T28B8.4	WBGene00012115	4.89024	2.97306e-08	4.56131e-07	Spermatogenic only
ZK1225.4	WBGene00014238	4.87993	3.06502e-08	4.6792e-07	Spermatogenic only
F47B3.7	WBGene00018531	6.2837	3.06268e-08	4.6792e-07	Spermatogenic only
Y50E8A.12	WBGene00013055	4.17214	3.15212e-08	4.80291e-07	Spermatogenic only
F56D6.22	WBGene00235359	6.3084	3.16372e-08	4.80291e-07	Spermatogenic only
wht-8	WBGene00012925	6.29057	3.21343e-08	4.85782e-07	Spermatogenic only
col-129	WBGene00000703	1.09707	3.22053e-08	4.86064e-07	Spermatogenic only
htas-1	WBGene00014240	4.46599	3.3974e-08	5.08623e-07	Spermatogenic only
C55A6.3	WBGene00008332	3.62724	3.41189e-08	5.09269e-07	Spermatogenic only
D1081.5	WBGene00008383	5.50054	3.41268e-08	5.09269e-07	Spermatogenic only
B0379.7	WBGene00007159	5.51556	3.42313e-08	5.10008e-07	Spermatogenic only
K06A1.2	WBGene00019425	5.49158	3.43035e-08	5.10264e-07	Spermatogenic only
ZK930.7	WBGene00014157	3.93279	3.48232e-08	5.17166e-07	Spermatogenic only
Y71G12B.30	WBGene00044347	4.46691	3.69526e-08	5.453e-07	Oogenic and Spermatogenic
F40F9.3	WBGene00009581	6.24006	3.71147e-08	5.46824e-07	Spermatogenic only
dhhc-12	WBGene00010323	6.26095	3.7369e-08	5.48828e-07	Spermatogenic only
F44D12.8	WBGene00009685	6.2279	3.86688e-08	5.67021e-07	Spermatogenic only
oac-50	WBGene00020864	5.5127	3.99587e-08	5.83171e-07	Spermatogenic only
C32D5.4	WBGene00016312	5.4584	4.05284e-08	5.90556e-07	Spermatogenic only
Y43F8C.5	WBGene00012827	3.88443	4.07032e-08	5.92175e-07	Oogenic and Spermatogenic
T21G5.1	WBGene00020659	4.88412	4.17643e-08	6.0561e-07	Spermatogenic only
F58G1.3	WBGene00010265	6.20072	4.58295e-08	6.60542e-07	Spermatogenic only
col-73	WBGene00000649	2.59572	4.61469e-08	6.64086e-07	Oogenic and Spermatogenic
sfxn-1.4	WBGene00008137	2.83609	4.7936e-08	6.877e-07	Oogenic and Spermatogenic
K09E4.1	WBGene00010719	3.99303	4.87065e-08	6.97675e-07	Spermatogenic only
F35E2.5	WBGene00009412	5.39022	4.93226e-08	7.05412e-07	Spermatogenic only
B0511.11	WBGene00015236	2.55141	5.20027e-08	7.39186e-07	Spermatogenic only
C47E12.10	WBGene00008153	6.19434	5.22077e-08	7.40966e-07	Spermatogenic only
E03H12.7	WBGene00017114	4.80323	5.62638e-08	7.94887e-07	Spermatogenic only
W03D8.10	WBGene00020991	5.44128	5.64577e-08	7.96414e-07	Spermatogenic only
F52H3.6	WBGene00009948	4.37209	6.09011e-08	8.55196e-07	Spermatogenic only
C28C12.1	WBGene00016177	3.27538	6.80318e-08	9.48155e-07	Spermatogenic only
ZC477.2	WBGene00022617	5.35683	7.08152e-08	9.85467e-07	Spermatogenic only
F56B3.6	WBGene00018930	4.77851	7.18171e-08	9.94934e-07	Spermatogenic only
T20F5.5	WBGene00020627	3.38474	7.27774e-08	1.00674e-06	Oogenic and Spermatogenic
C33H5.16	WBGene00016382	6.11771	7.60302e-08	1.04949e-06	Spermatogenic only
Y53F4B.19	WBGene00013165	4.37062	7.6094e-08	1.04949e-06	Spermatogenic only
ZK858.8	WBGene00014121	4.73345	7.67595e-08	1.05397e-06	Spermatogenic only
Y47D3A.31	WBGene00012937	4.40766	7.74834e-08	1.06234e-06	Spermatogenic only
T15B12.2	WBGene00020531	4.76061	8.03696e-08	1.09866e-06	Spermatogenic only
C29F5.3	WBGene00016212	6.113	8.0949e-08	1.10495e-06	Spermatogenic only
F21D9.2	WBGene00009016	4.75149	8.30958e-08	1.13259e-06	Spermatogenic only
F26D2.10	WBGene00009149	5.35606	8.4261e-08	1.14513e-06	Oogenic and Spermatogenic
Y67A6A.1	WBGene00013449	5.39855	8.42622e-08	1.14513e-06	Spermatogenic only
C09B9.7	WBGene00015630	6.08522	8.45205e-08	1.14696e-06	Spermatogenic only
F53G12.8	WBGene00018773	5.37532	8.51425e-08	1.15371e-06	Spermatogenic only
Y39B6A.25	WBGene00012684	5.3555	8.61522e-08	1.16569e-06	Spermatogenic only
kin-24	WBGene00002206	6.09553	8.64133e-08	1.16752e-06	Spermatogenic only
ctg-2	WBGene00011756	2.48911	8.7699e-08	1.18145e-06	Oogenic and Spermatogenic
oac-23	WBGene00018143	6.09665	8.8327e-08	1.18819e-06	Spermatogenic only
F54H12.8	WBGene00045247	4.71962	8.91895e-08	1.19806e-06	Spermatogenic only
F35E2.9	WBGene00009416	4.32157	8.97695e-08	1.2041e-06	Spermatogenic only
C32E12.1	WBGene00016327	5.32905	9.05669e-08	1.21305e-06	Spermatogenic only
mps-3	WBGene00020282	5.34668	9.52389e-08	1.27195e-06	Spermatogenic only
C06A1.3	WBGene00007354	6.08122	9.69518e-08	1.29297e-06	Spermatogenic only
F41G3.5	WBGene00018301	5.32533	1.00597e-07	1.33773e-06	Spermatogenic only
ssp-35	WBGene00010091	4.27168	1.01505e-07	1.34788e-06	Spermatogenic only
wht-5	WBGene00008950	5.32151	1.0459e-07	1.38489e-06	Spermatogenic only
best-26	WBGene00014103	5.311	1.07329e-07	1.41309e-06	Spermatogenic only
ZK84.2	WBGene00022650	5.37204	1.11851e-07	1.46638e-06	Spermatogenic only
col-39	WBGene00000616	2.71081	1.13365e-07	1.48205e-06	Oogenic and Spermatogenic
M176.9	WBGene00014813	6.03964	1.21208e-07	1.5757e-06	Spermatogenic only
wht-4	WBGene00017179	4.32114	1.22729e-07	1.59103e-06	Spermatogenic only
F36H12.4	WBGene00018120	5.34068	1.24891e-07	1.61454e-06	Spermatogenic only
Y1A5A.1	WBGene00012379	5.28385	1.25409e-07	1.61898e-06	Spermatogenic only
ftn-2	WBGene00001501	1.12521	1.29739e-07	1.67023e-06	Spermatogenic only
B0207.1	WBGene00015026	6.04499	1.36452e-07	1.7518e-06	Spermatogenic only
C27D8.2	WBGene00007778	5.30485	1.38006e-07	1.76724e-06	Spermatogenic only
ZK1098.6	WBGene00014223	3.17102	1.41088e-07	1.80383e-06	Spermatogenic only
toca-2	WBGene00010663	1.16938	2.24514e-07	2.74564e-06	Oogenic only
W02D7.4	WBGene00020940	2.89987	2.41182e-07	2.94173e-06	Spermatogenic only
F27D4.6	WBGene00009190	2.18152	2.64741e-07	3.208e-06	Spermatogenic only
col-77	WBGene00000653	3.32461	3.63844e-07	4.23208e-06	Spermatogenic only
kin-14	WBGene00002198	2.72619	4.00454e-07	4.60597e-06	Oogenic and Spermatogenic
gcy-12	WBGene00001538	1.40778	4.43901e-07	5.07425e-06	Spermatogenic only
C14B1.3	WBGene00007574	1.71729	4.68778e-07	5.33235e-06	Oogenic and Spermatogenic
col-92	WBGene00000667	1.94671	5.47322e-07	6.12816e-06	Oogenic and Spermatogenic
act-5	WBGene00000067	1.00259	6.30463e-07	6.95833e-06	Oogenic and Spermatogenic
B0261.6	WBGene00015094	4.75908	7.50076e-07	8.1716e-06	Spermatogenic only
W09C3.7	WBGene00021114	1.46837	7.5385e-07	8.20309e-06	Spermatogenic only
cth-1	WBGene00009048	2.39636	8.02324e-07	8.63941e-06	Spermatogenic only
T16G1.9	WBGene00011802	1.13484	8.28448e-07	8.88977e-06	Oogenic and Spermatogenic
C53D5.1	WBGene00016902	1.27371	8.34315e-07	8.94042e-06	Oogenic and Spermatogenic
ugt-62	WBGene00010904	1.74334	9.0198e-07	9.5682e-06	Oogenic and Spermatogenic
rpn-6.2	WBGene00010309	1.71571	9.09642e-07	9.63847e-06	Oogenic and Spermatogenic
Y54E5A.2	WBGene00013198	2.70937	9.72604e-07	1.02355e-05	Spermatogenic only
T01B11.2	WBGene00020139	1.47024	1.00204e-06	1.05096e-05	Spermatogenic only
C38H2.2	WBGene00008019	1.60002	1.05178e-06	1.09517e-05	Spermatogenic only
col-133	WBGene00000707	2.78147	1.66245e-06	1.6381e-05	Spermatogenic only
W02D9.2	WBGene00012208	1.00888	1.69457e-06	1.66621e-05	Oogenic only
aat-6	WBGene00000007	2.47652	1.91747e-06	1.85976e-05	Spermatogenic only
F22B8.7	WBGene00009049	2.22736	2.10808e-06	2.02333e-05	Oogenic and Spermatogenic
mlcd-1	WBGene00009439	1.10884	2.39212e-06	2.2773e-05	Oogenic and Spermatogenic
exl-1	WBGene00001371	1.95299	2.50728e-06	2.37233e-05	Oogenic and Spermatogenic
ZK637.14	WBGene00014031	2.2143	2.51673e-06	2.3773e-05	Oogenic and Spermatogenic
F41F3.3	WBGene00018297	2.4366	3.40882e-06	3.10202e-05	Oogenic and Spermatogenic
C56A3.8	WBGene00008346	1.71875	3.81366e-06	3.43674e-05	Oogenic and Spermatogenic
R07B7.4	WBGene00011088	2.47908	4.2378e-06	3.78585e-05	Spermatogenic only
C55B7.3	WBGene00016942	2.05304	6.17607e-06	5.24006e-05	Spermatogenic only
Y54G11A.19	WBGene00235256	1.06316	6.51804e-06	5.48012e-05	Oogenic and Spermatogenic
B0024.13	WBGene00007102	1.03337	6.59001e-06	5.52561e-05	Oogenic only
Y71F9AL.4	WBGene00022110	2.01605	7.66197e-06	6.33854e-05	Spermatogenic only
C18H2.1	WBGene00015988	1.83273	1.47248e-05	0.000113326	Spermatogenic only
F58H1.6	WBGene00010289	4.41125	1.48104e-05	0.000113706	Oogenic and Spermatogenic
snf-9	WBGene00004908	1.50716	1.62745e-05	0.00012382	Spermatogenic only
glna-3	WBGene00009271	2.13532	1.77975e-05	0.000134088	Oogenic and Spermatogenic
ndx-2	WBGene00003579	2.11666	2.22397e-05	0.000164881	Spermatogenic only
exc-9	WBGene00017644	2.1824	2.61929e-05	0.000190984	Oogenic and Spermatogenic
T07F10.1	WBGene00011587	1.15669	2.7562e-05	0.000200337	Spermatogenic only
F56A8.4	WBGene00010140	1.08617	2.93365e-05	0.000211908	Oogenic only
Y54E2A.8	WBGene00013193	1.10204	3.50954e-05	0.000248479	Oogenic and Spermatogenic
F30F8.10	WBGene00009277	1.09107	3.94141e-05	0.000275691	Oogenic only
bre-1	WBGene00000266	1.59712	4.17001e-05	0.000289499	Spermatogenic only
fncm-1	WBGene00018908	1.04989	4.84609e-05	0.000331233	Oogenic only
F26F4.8	WBGene00005011	1.2088	5.58847e-05	0.000376158	Oogenic and Spermatogenic
ram-2	WBGene00004300	1.24182	8.89517e-05	0.000580625	Oogenic and Spermatogenic
spin-1	WBGene00007549	1.6396	0.000171819	0.00106892	Spermatogenic only
ZC250.4	WBGene00045305	1.26515	0.000175559	0.00108999	Oogenic and Spermatogenic
C34C6.4	WBGene00007917	1.09804	0.000177913	0.00110313	Oogenic and Spermatogenic
C38D4.7	WBGene00008007	1.65191	0.000189818	0.00116991	Spermatogenic only
tni-1	WBGene00006584	1.3192	0.000193617	0.00119017	Oogenic and Spermatogenic
Y24D9B.1	WBGene00021287	4.13754	0.000211176	0.00129211	Oogenic and Spermatogenic
lin-33	WBGene00003019	1.76628	0.000213794	0.00130641	Spermatogenic only
M176.4	WBGene00010943	1.1007	0.000255238	0.00154039	Oogenic and Spermatogenic
F20D6.11	WBGene00017640	1.45391	0.000273817	0.00164609	Oogenic and Spermatogenic
T09B4.8	WBGene00020382	1.0459	0.000354273	0.00208388	Oogenic and Spermatogenic
col-71	WBGene00000647	1.89395	0.000372466	0.00218259	Oogenic and Spermatogenic
npl-4.2	WBGene00019121	1.29514	0.000391128	0.00228043	Oogenic only
F17A9.4	WBGene00017536	1.57854	0.000391967	0.00228389	Oogenic and Spermatogenic
ben-1	WBGene00000248	1.12843	0.00041532	0.00240038	Oogenic and Spermatogenic
cysl-2	WBGene00010759	1.32263	0.000455649	0.00261716	Oogenic only
T14D7.1	WBGene00011767	1.37749	0.000467685	0.00267966	Oogenic and Spermatogenic
F15D4.5	WBGene00008862	1.41151	0.000483478	0.00276333	Spermatogenic only
ife-5	WBGene00002063	1.21913	0.000499124	0.00284225	Oogenic and Spermatogenic
nape-2	WBGene00021370	1.57427	0.000536222	0.0030275	Oogenic and Spermatogenic
Y32F6A.6	WBGene00044209	1.54481	0.000648655	0.00361828	Spermatogenic only
col-94	WBGene00000669	1.27465	0.000664882	0.00369768	Spermatogenic only
R05H5.4	WBGene00011039	1.51534	0.000680863	0.00377075	Spermatogenic only
swt-3	WBGene00007384	1.20437	0.000718424	0.00395048	Spermatogenic only
abt-2	WBGene00000020	1.3025	0.000849004	0.0046101	Spermatogenic only
ifb-2	WBGene00002054	1.1292	0.000934639	0.00503501	Oogenic and Spermatogenic
Y47G6A.26	WBGene00021650	3.5482	0.00106417	0.00568662	Spermatogenic only
tom-1	WBGene00006594	1.00472	0.00108487	0.00579389	Spermatogenic only
aagr-4	WBGene00018682	1.11859	0.00112816	0.00599747	Oogenic only
C44C10.9	WBGene00008089	1.08747	0.00154834	0.00796215	Spermatogenic only
swt-4	WBGene00012647	1.16958	0.00187684	0.00948333	Oogenic and Spermatogenic
Y25C1A.13	WBGene00021296	1.00894	0.0022392	0.0111087	Oogenic and Spermatogenic
mans-2	WBGene00008258	1.06393	0.00305625	0.0146909	Spermatogenic only
tyr-2	WBGene00010661	1.21913	0.00339274	0.0160999	Spermatogenic only
fbxa-107	WBGene00012564	1.04198	0.00341196	0.0161809	Oogenic only
F22H10.10	WBGene00219912	1.13152	0.00366194	0.0172539	Spermatogenic only
memb-2	WBGene00019757	1.03633	0.00401188	0.0186564	Oogenic and Spermatogenic
F44A2.5	WBGene00018405	1.05782	0.00544389	0.0246008	Spermatogenic only
C01H6.6	WBGene00007255	1.01563	0.00629563	0.0280808	Oogenic and Spermatogenic
mlk-1	WBGene00003374	1.16364	0.00637352	0.0284145	Oogenic and Spermatogenic
K02B7.3	WBGene00010491	1.07202	0.00900566	0.0384652	Oogenic and Spermatogenic
Y37E11AL.2	WBGene00021358	3.45676	0.00926982	0.0393625	Spermatogenic only
Y32F6B.1	WBGene00012531	1.09861	0.0105731	0.0441121	Oogenic and Spermatogenic

## Sheet: OO enriched P<0.05
Gene name	Wormbase ID	log2 fold enrichment SP/OO (FBF iCLIP)	Unadjusted p value	BH-corrected p value	Program (Noble et al. 2016)
clec-87	WBGene00007709	-3.90183	1.26681e-98	1.17585e-94	Oogenic only
mrp-4	WBGene00003410	-4.91731	3.27383e-94	1.51938e-90	Oogenic only
meg-1	WBGene00010492	-5.81213	7.11474e-67	1.10065e-63	Oogenic only
puf-5	WBGene00004241	-2.25028	1.48683e-50	1.72509e-47	Oogenic only
cpg-2	WBGene00015102	-2.24589	1.72745e-47	1.60342e-44	Oogenic and Spermatogenic
C01G8.1	WBGene00015312	-2.03259	6.21472e-37	3.11001e-34	Oogenic only
die-1	WBGene00000995	-3.45678	1.01196e-35	4.26956e-33	Oogenic only
pos-1	WBGene00004078	-2.29542	1.48457e-35	5.74158e-33	Oogenic and Spermatogenic
cpg-1	WBGene00000465	-1.92941	2.90961e-33	1.08028e-30	Oogenic only
spn-4	WBGene00004984	-2.16953	2.71073e-32	8.98607e-30	Oogenic only
cpg-3	WBGene00011063	-4.12211	2.97026e-32	9.50689e-30	Oogenic only
W05F2.3	WBGene00021035	-2.1982	3.54569e-31	1.06165e-28	Oogenic only
Y52B11A.8	WBGene00013127	-2.73674	1.44414e-29	3.43706e-27	Oogenic only
F14H3.6	WBGene00008825	-5.37181	1.91005e-29	4.38836e-27	Oogenic only
gyg-2	WBGene00012020	-2.12862	7.6761e-29	1.5489e-26	Oogenic and Spermatogenic
F32D1.7	WBGene00017986	-1.83986	1.11156e-28	2.14947e-26	Oogenic and Spermatogenic
clec-91	WBGene00014117	-3.66836	6.89702e-27	1.16397e-24	Oogenic only
egg-1	WBGene00015083	-1.82107	1.10058e-26	1.82422e-24	Oogenic only
T01C3.3	WBGene00011320	-2.52061	1.76702e-26	2.87746e-24	Oogenic only
cyb-3	WBGene00000868	-1.72518	1.20159e-25	1.85886e-23	Oogenic only
T24D1.3	WBGene00011986	-1.55892	1.96536e-24	2.68272e-22	Oogenic only
rme-2	WBGene00004374	-1.88866	5.04455e-24	6.59485e-22	Oogenic only
gei-12	WBGene00001569	-4.37698	6.84702e-24	8.70603e-22	Oogenic only
clec-88	WBGene00019606	-2.04545	9.30337e-24	1.15139e-21	Oogenic only
mesp-1	WBGene00016178	-1.64032	1.91783e-22	2.19996e-20	Oogenic and Spermatogenic
chtl-1	WBGene00018037	-4.11062	2.64031e-22	2.88321e-20	Oogenic only
puf-3	WBGene00004239	-2.14484	2.87541e-22	3.10344e-20	Oogenic only
inx-3	WBGene00002125	-5.17528	1.56892e-21	1.5829e-19	Oogenic only
lin-41	WBGene00003026	-1.81494	1.35291e-20	1.2814e-18	Oogenic only
T21C9.13	WBGene00011898	-2.57098	1.63512e-20	1.53305e-18	Oogenic only
oma-2	WBGene00003865	-1.88581	3.28383e-19	2.77095e-17	Oogenic and Spermatogenic
dab-1	WBGene00000894	-1.27175	3.49582e-19	2.92326e-17	Oogenic only
Y51F10.2	WBGene00021763	-2.75273	2.04464e-18	1.58153e-16	Oogenic and Spermatogenic
his-24	WBGene00001898	-2.70957	1.28063e-17	9.21455e-16	Oogenic and Spermatogenic
T09B4.5	WBGene00020379	-4.08774	1.3263e-17	9.46977e-16	Oogenic only
dyn-1	WBGene00001130	-1.89596	1.93527e-17	1.36085e-15	Oogenic only
cbd-1	WBGene00010351	-1.26396	2.42473e-17	1.69221e-15	Oogenic only
R05H5.3	WBGene00011038	-2.09828	2.5538e-17	1.76899e-15	Oogenic and Spermatogenic
mex-3	WBGene00003229	-1.63812	5.56519e-17	3.68972e-15	Oogenic only
wdr-5.3	WBGene00013862	-1.26668	1.21152e-16	7.8639e-15	Oogenic only
ZK829.9	WBGene00014097	-5.52265	1.24737e-16	8.04036e-15	Oogenic only
gln-5	WBGene00001606	-1.47622	1.67407e-16	1.07164e-14	Oogenic only
mex-6	WBGene00003231	-1.38338	4.17751e-16	2.53436e-14	Oogenic only
W02F12.3	WBGene00020948	-1.7229	4.63422e-16	2.75736e-14	Oogenic only
egg-5	WBGene00020035	-1.796	6.03345e-16	3.54446e-14	Oogenic only
mex-1	WBGene00003228	-1.34774	1.26123e-15	7.13823e-14	Oogenic only
cdc-25.2	WBGene00000387	-4.9577	1.48469e-15	8.35206e-14	Oogenic only
daf-18	WBGene00000913	-1.27321	2.53439e-15	1.35197e-13	Oogenic only
R04D3.3	WBGene00011011	-6.91039	3.35629e-15	1.75017e-13	Oogenic only
klp-15	WBGene00002225	-1.35021	3.74265e-15	1.90875e-13	Oogenic only
F13C5.2	WBGene00017423	-2.89559	5.53141e-15	2.71654e-13	Oogenic only
F18A1.7	WBGene00017548	-1.72131	6.88545e-15	3.29437e-13	Oogenic only
F43G6.7	WBGene00009659	-4.27257	7.68104e-15	3.60078e-13	Oogenic only
rab-14	WBGene00004276	-2.23106	9.39067e-15	4.35821e-13	Oogenic only
gna-2	WBGene00001647	-1.80927	1.55695e-14	7.08411e-13	Oogenic only
C36C9.1	WBGene00016485	-4.01378	6.23336e-14	2.67861e-12	Oogenic only
rskn-1	WBGene00011352	-1.42771	7.69934e-14	3.19041e-12	Oogenic only
meg-2	WBGene00010493	-3.29518	8.42879e-14	3.47716e-12	Oogenic only
T05H10.4	WBGene00011509	-4.96222	8.93139e-14	3.66819e-12	Oogenic only
T12G3.6	WBGene00011741	-4.28626	1.18257e-13	4.77244e-12	Oogenic and Spermatogenic
H02I12.5	WBGene00010353	-1.62555	1.39026e-13	5.56226e-12	Oogenic and Spermatogenic
ZC308.4	WBGene00022586	-3.5349	1.46319e-13	5.77929e-12	Oogenic only
EEED8.3	WBGene00017134	-3.54783	1.68369e-13	6.53891e-12	Oogenic only
T09B9.1	WBGene00011642	-6.01943	1.77567e-13	6.86741e-12	Oogenic only
Y62E10A.14	WBGene00013380	-1.21315	2.66312e-13	9.92736e-12	Oogenic and Spermatogenic
mek-1	WBGene00003185	-2.3474	3.02863e-13	1.12447e-11	Oogenic only
ztf-11	WBGene00009939	-3.98054	4.03113e-13	1.47311e-11	Oogenic only
gln-6	WBGene00001607	-1.28835	4.93916e-13	1.77695e-11	Oogenic and Spermatogenic
F28C1.3	WBGene00009201	-1.62108	5.93033e-13	2.10097e-11	Oogenic only
fbxc-50	WBGene00015912	-3.5138	1.11569e-12	3.8355e-11	Oogenic only
F14H3.5	WBGene00008824	-8.57171	2.3577e-12	7.87199e-11	Oogenic only
F02E8.4	WBGene00017177	-6.19094	2.75013e-12	9.14935e-11	Oogenic only
pkn-1	WBGene00009793	-1.59771	2.85682e-12	9.43666e-11	Oogenic only
egg-2	WBGene00019811	-1.41137	2.95514e-12	9.72682e-11	Oogenic only
C18B12.4	WBGene00007666	-1.93403	3.11617e-12	1.02206e-10	Oogenic only
K04C1.2	WBGene00010552	-2.76595	3.12767e-12	1.02222e-10	Oogenic only
C01G6.3	WBGene00007225	-8.48177	3.46964e-12	1.13001e-10	Oogenic only
try-1	WBGene00006619	-6.15234	3.90719e-12	1.26364e-10	Oogenic only
F08F3.6	WBGene00017263	-7.28285	5.79921e-12	1.83089e-10	Oogenic only
C04B4.2	WBGene00007290	-6.08199	8.38549e-12	2.56878e-10	Oogenic only
srap-1	WBGene00011522	-1.61149	9.36837e-12	2.83248e-10	Oogenic only
ent-5	WBGene00017532	-8.34124	9.8056e-12	2.93234e-10	Oogenic only
T22F3.3	WBGene00020696	-1.04179	9.825e-12	2.93234e-10	Oogenic only
mes-1	WBGene00003219	-3.03572	1.06888e-11	3.17993e-10	Oogenic only
amx-1	WBGene00000137	-3.24036	1.19123e-11	3.52134e-10	Oogenic only
perm-1	WBGene00011350	-1.38434	1.3052e-11	3.84599e-10	Oogenic only
B0416.5	WBGene00015181	-1.47906	1.93968e-11	5.57402e-10	Oogenic only
ergo-1	WBGene00019971	-1.09114	3.45197e-11	9.47963e-10	Oogenic only
F43G6.10	WBGene00009662	-2.437	1.17751e-10	3.00266e-09	Oogenic only
rnr-2	WBGene00004392	-1.42805	1.20016e-10	3.04367e-09	Oogenic only
K04C1.5	WBGene00010555	-6.79394	1.61991e-10	4.03111e-09	Oogenic only
cht-1	WBGene00000503	-7.71939	2.01672e-10	4.95218e-09	Oogenic only
pie-1	WBGene00004027	-1.04248	2.10057e-10	5.13092e-09	Oogenic only
CC8.2	WBGene00016987	-1.62545	2.18019e-10	5.29751e-09	Oogenic only
C35E7.5	WBGene00016457	-6.68519	3.1945e-10	7.54488e-09	Oogenic only
otub-3	WBGene00009007	-1.3005	3.54004e-10	8.29765e-09	Oogenic only
epg-2	WBGene00021468	-3.08301	3.67292e-10	8.58741e-09	Oogenic and Spermatogenic
puf-7	WBGene00004243	-1.3273	3.83807e-10	8.95099e-09	Oogenic only
sri-40	WBGene00005552	-2.32497	4.15267e-10	9.63626e-09	Spermatogenic only
nos-2	WBGene00003784	-6.65559	4.31152e-10	9.95512e-09	Oogenic only
nhr-71	WBGene00003661	-2.46265	5.50092e-10	1.25453e-08	Oogenic only
alg-2	WBGene00000106	-1.88815	7.38195e-10	1.63922e-08	Oogenic only
rnr-1	WBGene00004391	-1.34111	1.08816e-09	2.31658e-08	Oogenic only
acs-13	WBGene00022037	-1.01723	1.40827e-09	2.95737e-08	Oogenic only
marc-3	WBGene00007643	-1.39434	1.82945e-09	3.71574e-08	Oogenic only
unc-84	WBGene00006816	-1.90089	2.48331e-09	4.93577e-08	Oogenic only
F45D3.4	WBGene00009724	-1.6267	2.57462e-09	5.09545e-08	Spermatogenic only
gpd-1	WBGene00001683	-1.50194	3.76371e-09	7.17347e-08	Oogenic only
F31E8.4	WBGene00017954	-2.6035	4.80009e-09	9.07422e-08	Oogenic only
F53F4.13	WBGene00009995	-1.29419	4.93336e-09	9.28832e-08	Spermatogenic only
puf-11	WBGene00022257	-1.17102	6.92133e-09	1.24504e-07	Oogenic only
icl-1	WBGene00001564	-1.12362	6.96879e-09	1.25115e-07	Spermatogenic only
T05F1.2	WBGene00011489	-1.22703	8.57695e-09	1.5021e-07	Oogenic only
rmd-2	WBGene00007786	-1.07923	8.88689e-09	1.55074e-07	Oogenic only
sex-1	WBGene00004786	-2.47376	2.10274e-08	3.37092e-07	Oogenic only
mcm-2	WBGene00003154	-1.27553	3.16675e-08	4.80291e-07	Oogenic only
F52D2.12	WBGene00219451	-2.46537	3.20492e-08	4.85287e-07	Oogenic only
C27C12.3	WBGene00007773	-1.68959	5.58727e-08	7.90564e-07	Oogenic only
gld-1	WBGene00001595	-1.2621	8.75111e-08	1.18064e-06	Oogenic only
ptr-2	WBGene00004217	-1.22457	9.86821e-08	1.31416e-06	Oogenic only
pcn-1	WBGene00003955	-1.11818	1.44299e-07	1.83729e-06	Oogenic and Spermatogenic
F10D7.5	WBGene00017342	-1.6682	1.79919e-07	2.25373e-06	Oogenic only
nasp-2	WBGene00008218	-1.25187	2.61293e-07	3.1745e-06	Oogenic only
F28F8.9	WBGene00044188	-1.36429	2.86997e-07	3.42845e-06	Oogenic only
miz-1	WBGene00011259	-1.19366	3.45513e-07	4.0442e-06	Oogenic only
egg-3	WBGene00009701	-1.09754	3.55403e-07	4.13908e-06	Oogenic only
C05C10.5	WBGene00007332	-1.26407	5.33883e-07	5.99215e-06	Oogenic only
F40F4.7	WBGene00018238	-1.48752	5.62021e-07	6.26252e-06	Oogenic only
lsm-1	WBGene00003076	-1.20089	5.63173e-07	6.26783e-06	Oogenic only
Y53C10A.6	WBGene00013137	-1.46477	5.95748e-07	6.60661e-06	Oogenic only
spsb-2	WBGene00021596	-1.92785	8.35094e-07	8.94042e-06	Oogenic only
F21D5.1	WBGene00009006	-1.03795	8.81785e-07	9.3754e-06	Oogenic only
egg-4	WBGene00020652	-1.28029	9.45101e-07	9.99137e-06	Oogenic only
cdh-4	WBGene00000396	-1.31565	1.0507e-06	1.09517e-05	Oogenic only
mcm-5	WBGene00003157	-1.05915	1.32282e-06	1.33235e-05	Oogenic only
F16B12.6	WBGene00008882	-1.65633	1.33738e-06	1.34424e-05	Oogenic only
C14B1.9	WBGene00007580	-1.03789	1.39266e-06	1.38847e-05	Oogenic only
F28H1.1	WBGene00017908	-1.67025	3.15211e-06	2.88539e-05	Oogenic only
tag-349	WBGene00013538	-1.21655	5.20647e-06	4.52546e-05	Oogenic only
sax-3	WBGene00004729	-1.46231	5.66177e-06	4.87048e-05	Oogenic only
sygl-1	WBGene00012104	-1.11379	6.02483e-06	5.13993e-05	Oogenic only
fbxa-215	WBGene00012879	-1.31574	6.06386e-06	5.16848e-05	Oogenic only
acs-2	WBGene00009221	-1.33073	7.76845e-06	6.39811e-05	Oogenic and Spermatogenic
hosl-1	WBGene00016704	-1.92261	7.90356e-06	6.50362e-05	Oogenic only
Y75B12B.1	WBGene00013567	-1.61028	1.01566e-05	8.10969e-05	Oogenic only
sodh-1	WBGene00010790	-1.11855	1.04262e-05	8.29275e-05	Oogenic and Spermatogenic
pqn-65	WBGene00004148	-1.18917	1.04866e-05	8.32651e-05	Oogenic only
dpy-27	WBGene00001086	-1.49193	1.33159e-05	0.000103689	Oogenic only
hmg-11	WBGene00001976	-1.68448	1.38275e-05	0.000107224	Oogenic only
Y4C6A.3	WBGene00021153	-1.49519	1.40813e-05	0.000109009	Oogenic only
aak-2	WBGene00020142	-1.09703	1.42253e-05	0.000109904	Oogenic only
tgt-2	WBGene00006567	-1.39651	1.75361e-05	0.000132549	Oogenic only
nhr-4	WBGene00003603	-1.84836	1.90988e-05	0.000143195	Oogenic only
ppk-3	WBGene00004089	-1.43105	2.05744e-05	0.000153761	Oogenic only
Y65B4A.10	WBGene00220188	-1.43251	2.06589e-05	0.000154169	Oogenic and Spermatogenic
cam-1	WBGene00000289	-1.49423	2.28948e-05	0.000169296	Oogenic only
F11A5.9	WBGene00008677	-1.26144	2.8104e-05	0.000204117	Oogenic only
mei-2	WBGene00003184	-1.01206	2.97803e-05	0.000214779	Oogenic only
R07E4.5	WBGene00019938	-1.66169	3.43909e-05	0.000244236	Oogenic only
daf-1	WBGene00000897	-1.10668	3.86516e-05	0.00027107	Oogenic only
sem-5	WBGene00004774	-1.57487	4.717e-05	0.00032384	Oogenic and Spermatogenic
atg-11	WBGene00020334	-1.45057	4.81751e-05	0.000329765	Oogenic only
ekl-5	WBGene00012512	-1.25954	5.41024e-05	0.00036522	Oogenic only
sdc-2	WBGene00004746	-1.50716	6.52311e-05	0.00043386	Oogenic only
nra-3	WBGene00007651	-1.28172	7.56144e-05	0.000497415	Oogenic only
nhr-46	WBGene00003636	-1.05863	7.74828e-05	0.000507906	Oogenic only
his-61	WBGene00001935	-1.56644	0.000103755	0.000669715	Oogenic only
T24H10.4	WBGene00012002	-1.27167	0.000111135	0.000712895	Oogenic only
C06B3.6	WBGene00007365	-1.5281	0.000130034	0.000822193	Oogenic and Spermatogenic
F17C11.4	WBGene00008915	-1.28812	0.000136689	0.000859582	Oogenic and Spermatogenic
F21A10.2	WBGene00008999	-1.07056	0.000155201	0.000970082	Oogenic only
his-62	WBGene00001936	-1.04916	0.000166755	0.0010402	Oogenic and Spermatogenic
F25E5.1	WBGene00017782	-1.25921	0.0001691	0.00105412	Oogenic only
C11H1.3	WBGene00007529	-1.57385	0.000174491	0.00108409	Oogenic only
klp-10	WBGene00002221	-1.14632	0.000189649	0.00116965	Oogenic only
W05H9.2	WBGene00021049	-1.57134	0.000204178	0.0012526	Oogenic only
mec-8	WBGene00003172	-1.30843	0.000219571	0.00133731	Oogenic only
sax-1	WBGene00004727	-1.45994	0.000239174	0.00144721	Oogenic only
gst-7	WBGene00001755	-1.34229	0.000299613	0.00178748	Oogenic and Spermatogenic
rgs-7	WBGene00004350	-1.40428	0.000329181	0.00195362	Oogenic only
flt-1	WBGene00001470	-1.41526	0.000331342	0.00196441	Oogenic only
sqv-4	WBGene00005022	-1.0282	0.000339164	0.00200645	Oogenic only
scl-2	WBGene00009895	-1.70325	0.000344	0.00202852	Spermatogenic only
sec-3	WBGene00018703	-1.40349	0.000358989	0.00210895	Oogenic only
pek-1	WBGene00003970	-1.26634	0.000376169	0.00219874	Oogenic only
Y106G6H.6	WBGene00013719	-1.17425	0.000385019	0.00224623	Oogenic only
puf-10	WBGene00004246	-1.00533	0.000394474	0.0022951	Oogenic only
hda-4	WBGene00001837	-1.00787	0.00039904	0.00231783	Oogenic only
F18H3.4	WBGene00008940	-1.6117	0.000406152	0.00235472	Oogenic only
mig-2	WBGene00003239	-1.11519	0.000407782	0.00236269	Oogenic only
Y37E11B.3	WBGene00021376	-1.25913	0.000442448	0.00254449	Oogenic only
oga-1	WBGene00020596	-1.32116	0.000515882	0.00292333	Oogenic only
tag-209	WBGene00011072	-1.0512	0.000532293	0.00300898	Spermatogenic only
W06B4.1	WBGene00021056	-1.46594	0.000594345	0.00333336	Oogenic only
rab-6.2	WBGene00004270	-1.03353	0.000617385	0.00345631	Oogenic only
C31E10.5	WBGene00007846	-1.07468	0.000637249	0.00356107	Oogenic only
lst-2	WBGene00003084	-1.08028	0.000638616	0.00356657	Oogenic only
sek-3	WBGene00022613	-1.15282	0.000670754	0.00372588	Oogenic only
ceh-39	WBGene00000460	-1.48701	0.000676704	0.00375159	Oogenic only
C04F12.1	WBGene00007297	-1.03546	0.000708855	0.00390481	Oogenic only
T28H10.3	WBGene00012144	-1.041	0.0007673	0.00420182	Spermatogenic only
ags-3	WBGene00000092	-1.31957	0.000837374	0.00455331	Oogenic only
B0513.4	WBGene00007196	-1.0658	0.000885089	0.00479591	Oogenic and Spermatogenic
nck-1	WBGene00006410	-1.14304	0.000959533	0.00515416	Oogenic only
T12G3.2	WBGene00011738	-1.0578	0.00121533	0.00639857	Oogenic only
K09H9.2	WBGene00019595	-1.17582	0.00128193	0.00671116	Oogenic only
F48F7.6	WBGene00009851	-1.17917	0.00152428	0.00785582	Oogenic only
pmk-1	WBGene00004055	-1.10819	0.00167488	0.00855597	Oogenic only
ldb-1	WBGene00002261	-1.06638	0.00174562	0.00889288	Oogenic only
F34H10.3	WBGene00009380	-1.23006	0.001841	0.00931236	Oogenic only
bet-2	WBGene00010199	-1.00851	0.00189874	0.00958875	Oogenic only
wago-4	WBGene00010263	-1.28345	0.00203881	0.0102238	Oogenic only
ZC504.3	WBGene00013917	-1.26841	0.00206208	0.0103175	Oogenic only
C31H5.4	WBGene00007855	-1.23294	0.0022327	0.0110823	Oogenic only
sli-1	WBGene00004829	-1.04672	0.00229583	0.0113531	Oogenic only
coh-1	WBGene00000591	-1.20942	0.00231467	0.0114403	Oogenic only
F56A11.5	WBGene00018925	-1.19597	0.00232653	0.0114927	Oogenic only
eat-20	WBGene00001148	-1.13399	0.00233068	0.0115071	Oogenic only
mml-1	WBGene00003378	-1.01163	0.00242755	0.011922	Oogenic only
tth-1	WBGene00006649	-1.12822	0.00258507	0.0126221	Oogenic only
rrn-3.1	WBGene00004622	-1.2211	0.00293368	0.0141751	Oogenic and Spermatogenic
F28F8.5	WBGene00009223	-1.00179	0.00296218	0.014298	Oogenic only
rrn-3.56	WBGene00004677	-1.21932	0.00366151	0.0172539	Oogenic and Spermatogenic
ZK858.10	WBGene00220246	-1.1363	0.00384439	0.0179495	Oogenic and Spermatogenic
mbd-2	WBGene00023409	-1.10904	0.00390264	0.018194	Oogenic only
ZC443.3	WBGene00013898	-1.17892	0.00413992	0.019175	Oogenic and Spermatogenic
F46H5.2	WBGene00018518	-1.10434	0.00462689	0.0211978	Oogenic only
cyn-10	WBGene00000886	-1.07472	0.00472242	0.0216035	Oogenic and Spermatogenic
zfp-3	WBGene00021047	-1.09	0.0047914	0.0218652	Oogenic only
mdt-8	WBGene00007013	-1.01574	0.00541872	0.024499	Oogenic only
cTel55X.1	WBGene00007068	-1.10244	0.00638612	0.028457	Oogenic only
anr-35	WBGene00219589	-1.05249	0.00831605	0.0358854	Oogenic and Spermatogenic
MTCE.33	WBGene00014472	-1.1574	0.0090092	0.0384652	Oogenic and Spermatogenic
grd-5	WBGene00001694	-1.09039	0.00902589	0.0385188	Spermatogenic only
hpr-17	WBGene00001998	-1.05206	0.00960484	0.0405975	Oogenic only
C06A6.2	WBGene00015507	-1.09545	0.0112211	0.0464354	Oogenic only

## Sheet: All DESeq2 results
Gene name	Wormbase ID	log2 fold enrichment SP/OO (FBF iCLIP)	Unadjusted p value	BH-corrected p value	Program (Noble et al. 2016)
clec-87	WBGene00007709	-3.90183	1.26681e-98	1.17585e-94	Oogenic only
mrp-4	WBGene00003410	-4.91731	3.27383e-94	1.51938e-90	Oogenic only
snpc-1.3	WBGene00017265	4.706	1.1614e-92	3.59337e-89	Oogenic and Spermatogenic
fog-1	WBGene00001481	3.08241	3.18798e-81	7.39771e-78	Oogenic and Spermatogenic
ZK484.5	WBGene00022751	4.97277	3.4445e-79	6.39437e-76	Spermatogenic only
meg-1	WBGene00010492	-5.81213	7.11474e-67	1.10065e-63	Oogenic only
F58F12.2	WBGene00019062	5.29232	2.14297e-54	2.84157e-51	Spermatogenic only
puf-5	WBGene00004241	-2.25028	1.48683e-50	1.72509e-47	Oogenic only
msp-64	WBGene00003457	4.72259	1.30877e-47	1.34978e-44	Spermatogenic only
cpg-2	WBGene00015102	-2.24589	1.72745e-47	1.60342e-44	Oogenic and Spermatogenic
gska-3	WBGene00007977	5.25873	8.09337e-46	6.82934e-43	Spermatogenic only
moa-1	WBGene00020116	5.42662	5.56244e-45	4.30255e-42	Spermatogenic only
W02B12.12	WBGene00012207	5.44747	2.90842e-41	2.07661e-38	Spermatogenic only
msp-76	WBGene00003463	4.0583	1.51533e-40	1.00466e-37	Spermatogenic only
F49C12.15	WBGene00009884	4.42493	1.91888e-40	1.18741e-37	Spermatogenic only
ZK973.8	WBGene00022834	4.99192	6.07414e-40	3.52376e-37	Oogenic and Spermatogenic
gipc-1	WBGene00016440	4.90144	8.18209e-40	4.46742e-37	Spermatogenic only
W03D8.9	WBGene00020990	5.00092	6.36611e-37	3.11001e-34	Spermatogenic only
C01G8.1	WBGene00015312	-2.03259	6.21472e-37	3.11001e-34	Oogenic only
F32B5.4	WBGene00017978	4.49761	1.60347e-36	7.44171e-34	Spermatogenic only
die-1	WBGene00000995	-3.45678	1.01196e-35	4.26956e-33	Oogenic only
ssq-2	WBGene00006051	4.1328	1.18064e-35	4.76466e-33	Spermatogenic only
pos-1	WBGene00004078	-2.29542	1.48457e-35	5.74158e-33	Oogenic and Spermatogenic
cpg-1	WBGene00000465	-1.92941	2.90961e-33	1.08028e-30	Oogenic only
F17E9.5	WBGene00017542	4.92931	9.17335e-33	3.27489e-30	Spermatogenic only
R09E10.6	WBGene00011176	4.37281	9.93221e-33	3.41447e-30	Spermatogenic only
spn-4	WBGene00004984	-2.16953	2.71073e-32	8.98607e-30	Oogenic only
cpg-3	WBGene00011063	-4.12211	2.97026e-32	9.50689e-30	Oogenic only
C04G2.9	WBGene00007308	5.69182	9.69402e-32	2.99933e-29	Spermatogenic only
W05F2.3	WBGene00021035	-2.1982	3.54569e-31	1.06165e-28	Oogenic only
ssq-4	WBGene00006053	5.03945	4.93127e-31	1.43038e-28	Spermatogenic only
gipc-2	WBGene00009681	4.30182	5.52687e-31	1.55456e-28	Spermatogenic only
F32A11.3	WBGene00009308	4.51133	9.46586e-31	2.58418e-28	Oogenic and Spermatogenic
Y69E1A.2	WBGene00013474	4.82197	2.0657e-30	5.32607e-28	Spermatogenic only
F21F3.3	WBGene00017673	5.95162	2.97e-30	7.45068e-28	Spermatogenic only
spe-15	WBGene00004969	3.38699	1.05519e-29	2.57744e-27	Oogenic and Spermatogenic
Y52B11A.8	WBGene00013127	-2.73674	1.44414e-29	3.43706e-27	Oogenic only
F14H3.6	WBGene00008825	-5.37181	1.91005e-29	4.38836e-27	Oogenic only
T10E9.4	WBGene00020414	5.30937	1.93841e-29	4.38836e-27	Oogenic and Spermatogenic
F42G4.2	WBGene00009641	5.77245	2.04955e-29	4.5295e-27	Oogenic and Spermatogenic
glo-4	WBGene00017195	2.81751	2.5389e-29	5.48047e-27	Oogenic and Spermatogenic
ZK550.5	WBGene00013999	4.68251	5.39451e-29	1.138e-26	Spermatogenic only
C09H10.9	WBGene00007503	5.83419	7.20649e-29	1.48646e-26	Spermatogenic only
gyg-2	WBGene00012020	-2.12862	7.6761e-29	1.5489e-26	Oogenic and Spermatogenic
C17F3.1	WBGene00015907	5.66979	8.48682e-29	1.67606e-26	Spermatogenic only
F32D1.7	WBGene00017986	-1.83986	1.11156e-28	2.14947e-26	Oogenic and Spermatogenic
ssq-1	WBGene00006050	4.73624	2.16761e-28	4.10608e-26	Oogenic and Spermatogenic
W03F11.4	WBGene00021007	5.54513	2.61475e-28	4.85403e-26	Spermatogenic only
msp-59	WBGene00003452	4.05315	4.05124e-28	7.37326e-26	Oogenic and Spermatogenic
Y69A2AR.32	WBGene00022101	2.11254	1.49671e-27	2.67163e-25	Oogenic and Spermatogenic
R11F4.1	WBGene00020007	2.68509	2.02751e-27	3.55082e-25	Spermatogenic only
nspd-1	WBGene00022754	4.15472	2.33731e-27	4.01758e-25	Oogenic and Spermatogenic
clec-91	WBGene00014117	-3.66836	6.89702e-27	1.16397e-24	Oogenic only
egg-1	WBGene00015083	-1.82107	1.10058e-26	1.82422e-24	Oogenic only
T01C3.3	WBGene00011320	-2.52061	1.76702e-26	2.87746e-24	Oogenic only
F47D12.7	WBGene00018563	4.98902	4.48101e-26	7.17117e-24	Spermatogenic only
catp-4	WBGene00007248	5.12412	7.50729e-26	1.18106e-23	Spermatogenic only
cyb-3	WBGene00000868	-1.72518	1.20159e-25	1.85886e-23	Oogenic only
F13D12.9	WBGene00008743	4.35412	3.11614e-25	4.74163e-23	Spermatogenic only
F27C8.5	WBGene00009185	6.08646	4.17923e-25	6.1574e-23	Spermatogenic only
Y38C1AA.7	WBGene00021398	4.44825	7.79534e-25	1.13057e-22	Spermatogenic only
msd-4	WBGene00016447	4.7162	9.76614e-25	1.37347e-22	Spermatogenic only
Y69A2AR.19	WBGene00022090	5.40154	1.09321e-24	1.51451e-22	Spermatogenic only
T24D1.3	WBGene00011986	-1.55892	1.96536e-24	2.68272e-22	Oogenic only
T05F1.5	WBGene00011491	4.98513	3.41395e-24	4.5269e-22	Spermatogenic only
rme-2	WBGene00004374	-1.88866	5.04455e-24	6.59485e-22	Oogenic only
ssp-16	WBGene00006044	5.65708	5.63203e-24	7.26062e-22	Spermatogenic only
gei-12	WBGene00001569	-4.37698	6.84702e-24	8.70603e-22	Oogenic only
C34C12.4	WBGene00007923	2.05019	7.45635e-24	9.35268e-22	Oogenic and Spermatogenic
clec-88	WBGene00019606	-2.04545	9.30337e-24	1.15139e-21	Oogenic only
Y38E10A.17	WBGene00012595	4.64755	1.13184e-23	1.38234e-21	Spermatogenic only
F27C1.1	WBGene00017851	3.97854	3.60874e-23	4.35018e-21	Spermatogenic only
snf-5	WBGene00004904	4.85252	4.52178e-23	5.38092e-21	Spermatogenic only
nspd-2	WBGene00010633	4.6367	1.68177e-22	1.97597e-20	Oogenic and Spermatogenic
mesp-1	WBGene00016178	-1.64032	1.91783e-22	2.19996e-20	Oogenic and Spermatogenic
D1081.12	WBGene00086554	5.19847	1.91981e-22	2.19996e-20	Spermatogenic only
C56G2.5	WBGene00016980	3.31413	1.97836e-22	2.21243e-20	Oogenic and Spermatogenic
F52F12.5	WBGene00009938	6.13657	1.97807e-22	2.21243e-20	Spermatogenic only
Y38H8A.3	WBGene00012637	5.39612	2.52615e-22	2.7914e-20	Spermatogenic only
chtl-1	WBGene00018037	-4.11062	2.64031e-22	2.88321e-20	Oogenic only
puf-3	WBGene00004239	-2.14484	2.87541e-22	3.10344e-20	Oogenic only
C44B9.2	WBGene00008079	4.84046	3.21927e-22	3.43463e-20	Spermatogenic only
Y92H12A.2	WBGene00022358	2.71198	5.45535e-22	5.6895e-20	Oogenic and Spermatogenic
C35E7.10	WBGene00016462	5.22359	5.5882e-22	5.7633e-20	Spermatogenic only
B0218.7	WBGene00015051	5.19017	7.9237e-22	8.08217e-20	Spermatogenic only
inx-3	WBGene00002125	-5.17528	1.56892e-21	1.5829e-19	Oogenic only
Y113G7C.1	WBGene00013771	5.27468	2.24714e-21	2.24279e-19	Spermatogenic only
K06A5.2	WBGene00019430	4.73859	2.41227e-21	2.38198e-19	Spermatogenic only
pitr-5	WBGene00017312	5.32481	4.36985e-21	4.26957e-19	Oogenic and Spermatogenic
R12C12.1	WBGene00020022	1.81658	8.37771e-21	8.01669e-19	Spermatogenic only
lin-41	WBGene00003026	-1.81494	1.35291e-20	1.2814e-18	Oogenic only
T21C9.13	WBGene00011898	-2.57098	1.63512e-20	1.53305e-18	Oogenic only
F07A5.2	WBGene00008541	5.21976	1.80547e-20	1.67583e-18	Spermatogenic only
T16A9.5	WBGene00011795	5.13839	3.61777e-20	3.32477e-18	Spermatogenic only
ZC434.8	WBGene00013894	2.26728	3.78987e-20	3.44878e-18	Oogenic and Spermatogenic
F08H9.2	WBGene00008590	4.09411	3.98152e-20	3.588e-18	Spermatogenic only
K04G2.4	WBGene00010563	5.50759	4.53603e-20	4.04841e-18	Spermatogenic only
ant-1.4	WBGene00020140	6.85506	5.19345e-20	4.59101e-18	Spermatogenic only
rmd-3	WBGene00007190	4.56426	7.55296e-20	6.61383e-18	Spermatogenic only
msp-81	WBGene00003467	4.85239	1.06853e-19	9.26925e-18	Spermatogenic only
R10E9.2	WBGene00011214	4.73434	2.06179e-19	1.772e-17	Spermatogenic only
F58E6.5	WBGene00010254	5.73177	3.06229e-19	2.60772e-17	Spermatogenic only
oma-2	WBGene00003865	-1.88581	3.28383e-19	2.77095e-17	Oogenic and Spermatogenic
dab-1	WBGene00000894	-1.27175	3.49582e-19	2.92326e-17	Oogenic only
fer-1	WBGene00001414	5.31456	3.81923e-19	3.16518e-17	Oogenic and Spermatogenic
E03H12.5	WBGene00017112	5.65357	3.87048e-19	3.17928e-17	Spermatogenic only
F53B6.4	WBGene00009959	4.26016	4.1679e-19	3.39355e-17	Spermatogenic only
C34D4.3	WBGene00016399	4.63233	4.43011e-19	3.57568e-17	Oogenic and Spermatogenic
T27A3.4	WBGene00020840	4.7333	9.99383e-19	7.92844e-17	Spermatogenic only
K07H8.9	WBGene00019509	1.87105	1.1817e-18	9.29537e-17	Oogenic and Spermatogenic
T23B3.5	WBGene00020713	5.2011	1.71593e-18	1.33842e-16	Spermatogenic only
Y51F10.2	WBGene00021763	-2.75273	2.04464e-18	1.58153e-16	Oogenic and Spermatogenic
ant-1.3	WBGene00010485	5.25318	3.70332e-18	2.81756e-16	Spermatogenic only
spe-41	WBGene00004976	3.03716	4.73556e-18	3.57362e-16	Oogenic and Spermatogenic
kel-10	WBGene00002186	4.73369	6.05295e-18	4.53093e-16	Spermatogenic only
ssp-10	WBGene00006039	5.16723	6.2423e-18	4.63529e-16	Spermatogenic only
C33F10.1	WBGene00016351	5.50459	6.41388e-18	4.72489e-16	Spermatogenic only
F01D5.8	WBGene00008498	4.51237	9.11192e-18	6.65959e-16	Spermatogenic only
R05D3.3	WBGene00019878	2.24827	9.87685e-18	7.16226e-16	Spermatogenic only
his-24	WBGene00001898	-2.70957	1.28063e-17	9.21455e-16	Oogenic and Spermatogenic
T09B4.5	WBGene00020379	-4.08774	1.3263e-17	9.46977e-16	Oogenic only
crh-2	WBGene00016162	1.29475	1.33903e-17	9.48768e-16	Oogenic only
dyn-1	WBGene00001130	-1.89596	1.93527e-17	1.36085e-15	Oogenic only
cbd-1	WBGene00010351	-1.26396	2.42473e-17	1.69221e-15	Oogenic only
R05H5.3	WBGene00011038	-2.09828	2.5538e-17	1.76899e-15	Oogenic and Spermatogenic
C06C3.10	WBGene00044169	6.3653	2.91568e-17	2.00469e-15	Spermatogenic only
spe-4	WBGene00004958	4.82919	3.27674e-17	2.23637e-15	Spermatogenic only
C09D4.3	WBGene00015634	6.37539	3.50048e-17	2.37164e-15	Spermatogenic only
R06B10.1	WBGene00019912	4.6546	3.57184e-17	2.40245e-15	Spermatogenic only
F58A6.9	WBGene00019026	5.38572	4.57261e-17	3.05345e-15	Spermatogenic only
mex-3	WBGene00003229	-1.63812	5.56519e-17	3.68972e-15	Oogenic only
nspd-7	WBGene00012781	5.30437	8.63606e-17	5.6851e-15	Spermatogenic only
F32H2.7	WBGene00009344	4.96355	1.18894e-16	7.77166e-15	Spermatogenic only
wdr-5.3	WBGene00013862	-1.26668	1.21152e-16	7.8639e-15	Oogenic only
ZK829.9	WBGene00014097	-5.52265	1.24737e-16	8.04036e-15	Oogenic only
gln-5	WBGene00001606	-1.47622	1.67407e-16	1.07164e-14	Oogenic only
sams-5	WBGene00006416	5.27365	1.69847e-16	1.07981e-14	Oogenic and Spermatogenic
C04F12.7	WBGene00007301	4.1246	1.7545e-16	1.10784e-14	Spermatogenic only
glct-6	WBGene00019546	3.7067	2.82655e-16	1.7727e-14	Oogenic and Spermatogenic
C10G11.8	WBGene00015688	4.94457	3.01118e-16	1.87582e-14	Spermatogenic only
msp-40	WBGene00003435	6.16778	3.10061e-16	1.91866e-14	Oogenic and Spermatogenic
smz-1	WBGene00007733	5.2582	3.25814e-16	2.00278e-14	Spermatogenic only
mex-6	WBGene00003231	-1.38338	4.17751e-16	2.53436e-14	Oogenic only
gsp-3	WBGene00021113	5.65125	4.29377e-16	2.58797e-14	Spermatogenic only
C18E9.8	WBGene00007688	5.62077	4.56283e-16	2.7324e-14	Spermatogenic only
W02F12.3	WBGene00020948	-1.7229	4.63422e-16	2.75736e-14	Oogenic only
T14G10.8	WBGene00011777	3.73305	5.97628e-16	3.53324e-14	Oogenic and Spermatogenic
egg-5	WBGene00020035	-1.796	6.03345e-16	3.54446e-14	Oogenic only
C17H12.12	WBGene00015937	3.75344	8.36585e-16	4.85324e-14	Spermatogenic only
C39H7.1	WBGene00016541	4.89466	1.11108e-15	6.40563e-14	Spermatogenic only
T08B6.4	WBGene00020353	4.628	1.16919e-15	6.69902e-14	Spermatogenic only
C15C6.2	WBGene00007601	4.85729	1.20573e-15	6.86601e-14	Oogenic and Spermatogenic
mex-1	WBGene00003228	-1.34774	1.26123e-15	7.13823e-14	Oogenic only
cdc-25.2	WBGene00000387	-4.9577	1.48469e-15	8.35206e-14	Oogenic only
C35A11.2	WBGene00016429	7.6598	1.51818e-15	8.48902e-14	Spermatogenic only
ssq-3	WBGene00006052	4.11313	1.58897e-15	8.83164e-14	Spermatogenic only
sss-1	WBGene00006056	4.39386	1.73363e-15	9.57833e-14	Spermatogenic only
irld-1	WBGene00044529	4.06708	1.764e-15	9.68843e-14	Spermatogenic only
T27A3.5	WBGene00020841	5.12791	1.81772e-15	9.92473e-14	Spermatogenic only
Y26E6A.3	WBGene00012514	2.48286	2.22854e-15	1.20966e-13	Oogenic and Spermatogenic
B0205.10	WBGene00015024	5.57194	2.37052e-15	1.27926e-13	Spermatogenic only
nhx-8	WBGene00003735	2.22469	2.39243e-15	1.28361e-13	Oogenic and Spermatogenic
daf-18	WBGene00000913	-1.27321	2.53439e-15	1.35197e-13	Oogenic only
K08C9.2	WBGene00010651	4.0244	2.6735e-15	1.41802e-13	Spermatogenic only
K08F4.5	WBGene00010679	5.48278	3.05253e-15	1.60986e-13	Spermatogenic only
msp-31	WBGene00003429	5.08738	3.10357e-15	1.62753e-13	Spermatogenic only
R04D3.3	WBGene00011011	-6.91039	3.35629e-15	1.75017e-13	Oogenic only
Y69E1A.1	WBGene00013473	5.93782	3.47354e-15	1.80119e-13	Spermatogenic only
C05B5.2	WBGene00007320	5.43459	3.65375e-15	1.87395e-13	Spermatogenic only
T27E7.1	WBGene00012087	4.15881	3.65422e-15	1.87395e-13	Spermatogenic only
klp-15	WBGene00002225	-1.35021	3.74265e-15	1.90875e-13	Oogenic only
F37A4.4	WBGene00018134	5.92385	4.03288e-15	2.04553e-13	Spermatogenic only
R07E5.15	WBGene00011120	5.14298	4.54389e-15	2.29219e-13	Spermatogenic only
C04G2.3	WBGene00014665	5.46798	4.85356e-15	2.43517e-13	Spermatogenic only
msp-50	WBGene00003443	4.75068	4.92266e-15	2.45657e-13	Oogenic and Spermatogenic
C50C3.2	WBGene00016800	4.81	4.96379e-15	2.46384e-13	Spermatogenic only
F40G12.10	WBGene00009605	5.50283	5.29726e-15	2.61538e-13	Spermatogenic only
F13C5.2	WBGene00017423	-2.89559	5.53141e-15	2.71654e-13	Oogenic only
msp-152	WBGene00003470	5.40095	5.88501e-15	2.87498e-13	Oogenic and Spermatogenic
C35E7.9	WBGene00016461	4.17588	5.93683e-15	2.88511e-13	Spermatogenic only
abt-1	WBGene00000019	4.18491	6.0499e-15	2.92475e-13	Spermatogenic only
D1086.17	WBGene00045355	5.89691	6.677e-15	3.21119e-13	Spermatogenic only
F18A1.7	WBGene00017548	-1.72131	6.88545e-15	3.29437e-13	Oogenic only
C10G11.9	WBGene00015689	5.48961	7.39972e-15	3.52227e-13	Spermatogenic only
Y59E9AL.2	WBGene00043743	5.44735	7.59307e-15	3.57761e-13	Spermatogenic only
msp-77	WBGene00003464	4.62397	7.56366e-15	3.57761e-13	Spermatogenic only
F43G6.7	WBGene00009659	-4.27257	7.68104e-15	3.60078e-13	Oogenic only
K09F6.3	WBGene00019586	5.05423	8.91581e-15	4.15862e-13	Spermatogenic only
rab-14	WBGene00004276	-2.23106	9.39067e-15	4.35821e-13	Oogenic only
spe-11	WBGene00004965	4.45981	1.38556e-14	6.33533e-13	Spermatogenic only
ZK938.1	WBGene00014158	4.43695	1.37954e-14	6.33533e-13	Spermatogenic only
gna-2	WBGene00001647	-1.80927	1.55695e-14	7.08411e-13	Oogenic only
Y59E9AL.6	WBGene00021996	5.01912	1.75701e-14	7.95539e-13	Spermatogenic only
Y43F8A.2	WBGene00012809	4.24412	2.02958e-14	9.09365e-13	Spermatogenic only
acs-18	WBGene00011173	4.6929	2.03779e-14	9.09365e-13	Spermatogenic only
R105.1	WBGene00020084	5.84699	2.52081e-14	1.11953e-12	Spermatogenic only
hcp-2	WBGene00001830	1.17189	3.88623e-14	1.71771e-12	Oogenic and Spermatogenic
T05A7.6	WBGene00020223	4.64415	4.67267e-14	2.05553e-12	Spermatogenic only
sss-2	WBGene00006057	4.5966	5.10292e-14	2.23421e-12	Spermatogenic only
H05L14.1	WBGene00010366	4.86976	5.28345e-14	2.30239e-12	Spermatogenic only
K04H4.5	WBGene00010574	5.74379	5.9914e-14	2.5987e-12	Spermatogenic only
ncr-2	WBGene00003562	4.44488	6.02022e-14	2.59905e-12	Spermatogenic only
C36C9.1	WBGene00016485	-4.01378	6.23336e-14	2.67861e-12	Oogenic only
msp-3	WBGene00003424	5.302	6.35876e-14	2.71991e-12	Spermatogenic only
F46A9.1	WBGene00009754	5.69816	6.48022e-14	2.75915e-12	Spermatogenic only
clec-73	WBGene00021579	5.2678	6.59099e-14	2.7935e-12	Spermatogenic only
C14C10.1	WBGene00007584	3.75597	7.10366e-14	2.98354e-12	Oogenic and Spermatogenic
F55H12.5	WBGene00010136	4.85159	7.08249e-14	2.98354e-12	Oogenic and Spermatogenic
T23G11.1	WBGene00011968	5.6866	7.22239e-14	3.01974e-12	Spermatogenic only
msp-36	WBGene00003432	4.16569	7.56227e-14	3.14767e-12	Spermatogenic only
rskn-1	WBGene00011352	-1.42771	7.69934e-14	3.19041e-12	Oogenic only
meg-2	WBGene00010493	-3.29518	8.42879e-14	3.47716e-12	Oogenic only
T05H10.4	WBGene00011509	-4.96222	8.93139e-14	3.66819e-12	Oogenic only
nspa-8	WBGene00012294	4.8653	9.1513e-14	3.74195e-12	Spermatogenic only
C38C3.3	WBGene00016512	4.04736	1.10633e-13	4.50392e-12	Spermatogenic only
mboa-4	WBGene00007446	4.31364	1.14791e-13	4.65278e-12	Spermatogenic only
T12G3.6	WBGene00011741	-4.28626	1.18257e-13	4.77244e-12	Oogenic and Spermatogenic
F21H7.5	WBGene00009031	4.36239	1.28676e-13	5.17044e-12	Spermatogenic only
H02I12.5	WBGene00010353	-1.62555	1.39026e-13	5.56226e-12	Oogenic and Spermatogenic
msp-49	WBGene00003442	3.38242	1.40945e-13	5.6148e-12	Oogenic and Spermatogenic
ZK354.2	WBGene00022705	3.9581	1.44914e-13	5.74827e-12	Spermatogenic only
ZC308.4	WBGene00022586	-3.5349	1.46319e-13	5.77929e-12	Oogenic only
msp-142	WBGene00003469	4.78528	1.57743e-13	6.20413e-12	Spermatogenic only
ZK622.1	WBGene00022780	5.67967	1.62156e-13	6.35075e-12	Spermatogenic only
tbx-34	WBGene00006553	5.58324	1.64368e-13	6.41036e-12	Spermatogenic only
EEED8.3	WBGene00017134	-3.54783	1.68369e-13	6.53891e-12	Oogenic only
T09B9.1	WBGene00011642	-6.01943	1.77567e-13	6.86741e-12	Oogenic only
cyn-2	WBGene00000878	4.09876	1.79165e-13	6.90045e-12	Spermatogenic only
smz-2	WBGene00020661	3.81047	1.87315e-13	7.18452e-12	Spermatogenic only
cyc-2.2	WBGene00013854	5.17335	2.07737e-13	7.93504e-12	Spermatogenic only
C33F10.11	WBGene00016357	4.54273	2.31472e-13	8.80542e-12	Oogenic and Spermatogenic
Y106G6H.13	WBGene00013723	4.80559	2.34551e-13	8.88613e-12	Spermatogenic only
C17H12.3	WBGene00015929	5.17992	2.46561e-13	9.30316e-12	Spermatogenic only
acdh-5	WBGene00016491	5.64176	2.48332e-13	9.33204e-12	Spermatogenic only
Y54F10BM.3	WBGene00021858	2.83137	2.61202e-13	9.77611e-12	Spermatogenic only
Y62E10A.14	WBGene00013380	-1.21315	2.66312e-13	9.92736e-12	Oogenic and Spermatogenic
mek-1	WBGene00003185	-2.3474	3.02863e-13	1.12447e-11	Oogenic only
spe-44	WBGene00007732	1.83106	3.27385e-13	1.21067e-11	Oogenic and Spermatogenic
nspd-3	WBGene00016058	5.06929	3.81125e-13	1.40381e-11	Spermatogenic only
nhr-23	WBGene00003622	1.06679	3.8665e-13	1.41853e-11	Oogenic and Spermatogenic
ztf-11	WBGene00009939	-3.98054	4.03113e-13	1.47311e-11	Oogenic only
Y69A2AR.8	WBGene00022079	5.08326	4.29755e-13	1.56431e-11	Spermatogenic only
F07F6.1	WBGene00017215	4.74038	4.84533e-13	1.75681e-11	Spermatogenic only
acs-10	WBGene00007082	5.10323	4.89822e-13	1.76908e-11	Spermatogenic only
gln-6	WBGene00001607	-1.28835	4.93916e-13	1.77695e-11	Oogenic and Spermatogenic
C01G12.9	WBGene00007249	5.67832	4.96193e-13	1.77825e-11	Spermatogenic only
clec-79	WBGene00018548	5.05346	5.06806e-13	1.8093e-11	Spermatogenic only
msp-33	WBGene00003431	5.05777	5.57819e-13	1.98378e-11	Spermatogenic only
F28C1.3	WBGene00009201	-1.62108	5.93033e-13	2.10097e-11	Oogenic only
cpb-2	WBGene00000771	5.07375	6.87844e-13	2.42759e-11	Spermatogenic only
acdh-8	WBGene00019406	6.94257	6.95628e-13	2.44576e-11	Spermatogenic only
ssp-11	WBGene00006040	4.47328	7.05751e-13	2.47199e-11	Spermatogenic only
T25B9.6	WBGene00012012	6.06257	7.34107e-13	2.56165e-11	Spermatogenic only
F34D10.8	WBGene00009377	3.99205	7.84802e-13	2.72829e-11	Spermatogenic only
Y37E11B.10	WBGene00021381	5.03782	9.59088e-13	3.32174e-11	Spermatogenic only
fbxc-50	WBGene00015912	-3.5138	1.11569e-12	3.8355e-11	Oogenic only
Y57G7A.6	WBGene00021969	4.38674	1.1308e-12	3.87311e-11	Spermatogenic only
osta-1	WBGene00015287	6.09945	1.25521e-12	4.28339e-11	Spermatogenic only
spe-46	WBGene00012296	5.51722	1.36403e-12	4.63771e-11	Spermatogenic only
apm-1	WBGene00000150	2.16331	1.68909e-12	5.70113e-11	Oogenic and Spermatogenic
F36A2.10	WBGene00009457	4.97993	1.96852e-12	6.62022e-11	Spermatogenic only
msp-56	WBGene00003449	4.94082	2.27145e-12	7.61142e-11	Spermatogenic only
F14H3.5	WBGene00008824	-8.57171	2.3577e-12	7.87199e-11	Oogenic only
F02E8.4	WBGene00017177	-6.19094	2.75013e-12	9.14935e-11	Oogenic only
C33F10.12	WBGene00016358	4.65013	2.82108e-12	9.35187e-11	Oogenic and Spermatogenic
pkn-1	WBGene00009793	-1.59771	2.85682e-12	9.43666e-11	Oogenic only
egg-2	WBGene00019811	-1.41137	2.95514e-12	9.72682e-11	Oogenic only
C18B12.4	WBGene00007666	-1.93403	3.11617e-12	1.02206e-10	Oogenic only
K04C1.2	WBGene00010552	-2.76595	3.12767e-12	1.02222e-10	Oogenic only
C01G6.3	WBGene00007225	-8.48177	3.46964e-12	1.13001e-10	Oogenic only
ttr-9	WBGene00007888	5.90686	3.78667e-12	1.22895e-10	Spermatogenic only
try-1	WBGene00006619	-6.15234	3.90719e-12	1.26364e-10	Oogenic only
F32B4.2	WBGene00009313	4.90575	3.96812e-12	1.27889e-10	Spermatogenic only
clec-151	WBGene00008659	4.33573	4.55152e-12	1.46184e-10	Spermatogenic only
D2092.1	WBGene00017063	2.77764	4.62677e-12	1.48089e-10	Spermatogenic only
Y54G2A.26	WBGene00021890	1.12261	4.93474e-12	1.56864e-10	Oogenic and Spermatogenic
K10D2.8	WBGene00189952	3.29762	4.92009e-12	1.56864e-10	Spermatogenic only
nspd-5	WBGene00017386	4.90735	5.27841e-12	1.67216e-10	Spermatogenic only
F08F3.6	WBGene00017263	-7.28285	5.79921e-12	1.83089e-10	Oogenic only
msp-38	WBGene00003434	4.2732	5.84941e-12	1.84048e-10	Spermatogenic only
irld-3	WBGene00017175	6.69059	7.09959e-12	2.2263e-10	Oogenic and Spermatogenic
C28A5.6	WBGene00007791	4.62932	7.59455e-12	2.37349e-10	Spermatogenic only
osta-2	WBGene00015942	2.11769	7.72373e-12	2.40576e-10	Oogenic and Spermatogenic
cpb-1	WBGene00000770	1.28474	7.76029e-12	2.40906e-10	Oogenic and Spermatogenic
C28D4.7	WBGene00007794	5.28293	7.81267e-12	2.41724e-10	Spermatogenic only
K02F6.3	WBGene00019337	4.55357	7.99601e-12	2.46574e-10	Spermatogenic only
nspd-6	WBGene00043147	4.28355	8.20983e-12	2.5233e-10	Spermatogenic only
C04B4.2	WBGene00007290	-6.08199	8.38549e-12	2.56878e-10	Oogenic only
T02E1.7	WBGene00011379	5.80109	8.50625e-12	2.58869e-10	Spermatogenic only
tag-335	WBGene00016583	1.22134	8.50551e-12	2.58869e-10	Oogenic only
F13A7.1	WBGene00008724	4.85701	8.82452e-12	2.67677e-10	Spermatogenic only
srap-1	WBGene00011522	-1.61149	9.36837e-12	2.83248e-10	Oogenic only
swt-1	WBGene00019300	2.47046	9.47663e-12	2.85504e-10	Spermatogenic only
ent-5	WBGene00017532	-8.34124	9.8056e-12	2.93234e-10	Oogenic only
T22F3.3	WBGene00020696	-1.04179	9.825e-12	2.93234e-10	Oogenic only
mes-1	WBGene00003219	-3.03572	1.06888e-11	3.17993e-10	Oogenic only
Y38F1A.1	WBGene00012605	4.08927	1.15244e-11	3.41754e-10	Spermatogenic only
amx-1	WBGene00000137	-3.24036	1.19123e-11	3.52134e-10	Oogenic only
perm-1	WBGene00011350	-1.38434	1.3052e-11	3.84599e-10	Oogenic only
Y106G6D.3	WBGene00013700	5.20895	1.33091e-11	3.90935e-10	Spermatogenic only
elo-7	WBGene00001245	5.80662	1.34356e-11	3.93405e-10	Spermatogenic only
K11C4.1	WBGene00019642	4.50282	1.36677e-11	3.98942e-10	Spermatogenic only
F20H11.4	WBGene00017647	4.20847	1.40656e-11	4.0927e-10	Spermatogenic only
B0393.4	WBGene00007169	8.12058	1.64757e-11	4.7641e-10	Spermatogenic only
B0416.5	WBGene00015181	-1.47906	1.93968e-11	5.57402e-10	Oogenic only
C06A8.6	WBGene00015516	4.2516	1.95267e-11	5.59403e-10	Oogenic and Spermatogenic
F32B6.4	WBGene00009321	4.79356	2.01315e-11	5.74955e-10	Spermatogenic only
ZK512.8	WBGene00013987	4.19349	2.0309e-11	5.78246e-10	Spermatogenic only
ZK265.3	WBGene00013956	5.75851	2.21556e-11	6.2771e-10	Spermatogenic only
cdr-4	WBGene00010470	2.46452	2.21815e-11	6.2771e-10	Oogenic and Spermatogenic
acs-6	WBGene00022849	4.47971	2.28292e-11	6.44075e-10	Spermatogenic only
clec-123	WBGene00021288	4.41198	2.38381e-11	6.705e-10	Spermatogenic only
ZK858.2	WBGene00014116	4.79351	2.54761e-11	7.12257e-10	Spermatogenic only
C27A7.5	WBGene00007756	1.81034	2.72132e-11	7.56266e-10	Oogenic and Spermatogenic
abt-5	WBGene00000023	4.13884	2.98206e-11	8.26254e-10	Spermatogenic only
C36H8.1	WBGene00007987	4.73576	3.09398e-11	8.54712e-10	Spermatogenic only
K05F1.9	WBGene00019410	5.71618	3.32703e-11	9.16366e-10	Spermatogenic only
ergo-1	WBGene00019971	-1.09114	3.45197e-11	9.47963e-10	Oogenic only
F27E5.3	WBGene00009193	7.98119	4.13599e-11	1.12581e-09	Spermatogenic only
C42C1.3	WBGene00016581	4.16157	4.19134e-11	1.13754e-09	Spermatogenic only
K01H12.4	WBGene00010486	4.4187	4.23718e-11	1.14663e-09	Spermatogenic only
T13F2.9	WBGene00011748	4.68828	4.93729e-11	1.32466e-09	Spermatogenic only
wago-10	WBGene00020707	6.42171	4.93788e-11	1.32466e-09	Spermatogenic only
Y105E8A.27	WBGene00013684	7.3175	5.20699e-11	1.39283e-09	Spermatogenic only
mpst-4	WBGene00017387	5.1517	5.35203e-11	1.42752e-09	Spermatogenic only
C17H12.5	WBGene00015931	4.40826	5.58821e-11	1.48624e-09	Spermatogenic only
best-6	WBGene00015628	7.29147	5.69276e-11	1.50972e-09	Spermatogenic only
F54F12.1	WBGene00010072	4.38526	6.39945e-11	1.68749e-09	Spermatogenic only
C42C1.9	WBGene00016587	3.75688	6.7671e-11	1.77938e-09	Spermatogenic only
ssp-34	WBGene00013858	6.33485	6.93691e-11	1.81888e-09	Spermatogenic only
T22C1.8	WBGene00011918	5.58868	7.70872e-11	2.0099e-09	Oogenic and Spermatogenic
ZK945.7	WBGene00014169	5.56359	8.46439e-11	2.20074e-09	Spermatogenic only
C27D6.3	WBGene00016161	3.9588	8.70406e-11	2.25673e-09	Spermatogenic only
wht-6	WBGene00007060	3.35456	9.11754e-11	2.35736e-09	Spermatogenic only
C41G7.6	WBGene00008063	4.63382	9.14968e-11	2.35909e-09	Spermatogenic only
F25F2.1	WBGene00009115	5.02366	9.26447e-11	2.38207e-09	Oogenic and Spermatogenic
T05C12.1	WBGene00011466	5.04279	1.0193e-10	2.61358e-09	Spermatogenic only
F43G6.10	WBGene00009662	-2.437	1.17751e-10	3.00266e-09	Oogenic only
nspd-10	WBGene00020860	4.74563	1.19609e-10	3.04168e-09	Spermatogenic only
rnr-2	WBGene00004392	-1.42805	1.20016e-10	3.04367e-09	Oogenic only
F48F5.2	WBGene00009846	6.35568	1.24144e-10	3.1398e-09	Spermatogenic only
Y106G6A.4	WBGene00013696	5.50237	1.27683e-10	3.22053e-09	Spermatogenic only
F31E8.5	WBGene00017955	6.24865	1.48224e-10	3.72849e-09	Oogenic and Spermatogenic
ent-3	WBGene00010510	7.15789	1.5042e-10	3.77352e-09	Spermatogenic only
F01G10.5	WBGene00008508	4.97636	1.57899e-10	3.93985e-09	Spermatogenic only
K04C1.5	WBGene00010555	-6.79394	1.61991e-10	4.03111e-09	Oogenic only
des-2	WBGene00000955	2.96718	1.66524e-10	4.13283e-09	Spermatogenic only
ZK688.10	WBGene00044447	5.51967	1.84581e-10	4.56876e-09	Spermatogenic only
rnh-1.1	WBGene00022888	4.96741	1.89096e-10	4.66805e-09	Spermatogenic only
ZK637.12	WBGene00014029	5.46872	1.96552e-10	4.83925e-09	Spermatogenic only
cht-1	WBGene00000503	-7.71939	2.01672e-10	4.95218e-09	Oogenic only
pie-1	WBGene00004027	-1.04248	2.10057e-10	5.13092e-09	Oogenic only
btb-2	WBGene00020802	5.47518	2.12394e-10	5.17438e-09	Spermatogenic only
CC8.2	WBGene00016987	-1.62545	2.18019e-10	5.29751e-09	Oogenic only
F36A2.14	WBGene00023490	5.50894	2.26579e-10	5.49114e-09	Oogenic and Spermatogenic
F26B1.8	WBGene00194703	4.65158	2.46082e-10	5.94826e-09	Spermatogenic only
sup-17	WBGene00006324	-0.93885	2.56537e-10	6.18487e-09	Oogenic only
C07G1.6	WBGene00015572	5.42287	2.83205e-10	6.81014e-09	Spermatogenic only
ZC477.7	WBGene00022621	4.97216	2.84208e-10	6.81658e-09	Spermatogenic only
F55C12.1	WBGene00018869	1.4312	2.8994e-10	6.91831e-09	Oogenic and Spermatogenic
msp-45	WBGene00003438	3.98431	2.93097e-10	6.9757e-09	Spermatogenic only
C35E7.5	WBGene00016457	-6.68519	3.1945e-10	7.54488e-09	Oogenic only
ZK686.5	WBGene00022795	6.18106	3.38903e-10	7.98401e-09	Spermatogenic only
otub-3	WBGene00009007	-1.3005	3.54004e-10	8.29765e-09	Oogenic only
aman-3	WBGene00018594	3.65109	3.53373e-10	8.29765e-09	Spermatogenic only
epg-2	WBGene00021468	-3.08301	3.67292e-10	8.58741e-09	Oogenic and Spermatogenic
puf-7	WBGene00004243	-1.3273	3.83807e-10	8.95099e-09	Oogenic only
F56F4.3	WBGene00018980	6.15571	3.86278e-10	8.98604e-09	Spermatogenic only
sri-40	WBGene00005552	-2.32497	4.15267e-10	9.63626e-09	Spermatogenic only
nos-2	WBGene00003784	-6.65559	4.31152e-10	9.95512e-09	Oogenic only
F36A2.12	WBGene00009459	5.35282	4.42437e-10	1.01903e-08	Oogenic and Spermatogenic
tbc-3	WBGene00009322	1.11465	4.91825e-10	1.12719e-08	Oogenic only
mdt-28	WBGene00007024	-0.906595	5.20045e-10	1.18893e-08	Oogenic only
nhr-71	WBGene00003661	-2.46265	5.50092e-10	1.25453e-08	Oogenic only
zyg-11	WBGene00006996	-0.895302	5.68859e-10	1.29415e-08	Oogenic only
C34D4.2	WBGene00016398	4.81933	5.84365e-10	1.32618e-08	Spermatogenic only
R10F2.6	WBGene00019997	3.36886	5.99127e-10	1.35636e-08	Oogenic and Spermatogenic
C02F5.5	WBGene00015348	5.32251	6.42129e-10	1.45018e-08	Oogenic and Spermatogenic
F26F4.2	WBGene00005012	7.50122	6.6007e-10	1.48708e-08	Oogenic and Spermatogenic
frk-1	WBGene00001487	5.34543	6.89346e-10	1.54928e-08	Spermatogenic only
C09B9.2	WBGene00015627	6.06118	7.17747e-10	1.60737e-08	Spermatogenic only
C24D10.2	WBGene00016054	4.83276	7.34252e-10	1.6383e-08	Spermatogenic only
alg-2	WBGene00000106	-1.88815	7.38195e-10	1.63922e-08	Oogenic only
spe-26	WBGene00004972	4.45469	7.37382e-10	1.63922e-08	Spermatogenic only
Y71G12B.27	WBGene00022162	5.32939	7.78633e-10	1.71669e-08	Spermatogenic only
B0244.9	WBGene00015084	6.03334	8.52668e-10	1.87103e-08	Spermatogenic only
F56A11.6	WBGene00018926	4.82286	8.7614e-10	1.918e-08	Spermatogenic only
oac-9	WBGene00016753	4.81481	8.78258e-10	1.91812e-08	Spermatogenic only
Y18D10A.11	WBGene00012481	-0.996013	8.9499e-10	1.95007e-08	Oogenic and Spermatogenic
C01G10.1	WBGene00007230	4.43866	9.4803e-10	2.0608e-08	Spermatogenic only
F56F3.4	WBGene00010155	5.27155	1.00188e-09	2.15811e-08	Spermatogenic only
R11E3.1	WBGene00020003	4.13772	1.0021e-09	2.15811e-08	Spermatogenic only
C52E4.7	WBGene00008259	5.35537	1.00066e-09	2.15811e-08	Oogenic and Spermatogenic
ZK856.18	WBGene00194912	4.85216	9.95574e-10	2.15811e-08	Spermatogenic only
C05C12.5	WBGene00007337	7.42703	1.02053e-09	2.19272e-08	Spermatogenic only
kin-5	WBGene00002193	5.25878	1.05672e-09	2.26001e-08	Spermatogenic only
T28H11.7	WBGene00020905	4.76835	1.075e-09	2.29383e-08	Spermatogenic only
rnr-1	WBGene00004391	-1.34111	1.08816e-09	2.31658e-08	Oogenic only
F36A4.4	WBGene00018083	4.85449	1.10286e-09	2.3425e-08	Spermatogenic only
C32E8.4	WBGene00016322	5.30069	1.11415e-09	2.36108e-08	Oogenic and Spermatogenic
W01B6.2	WBGene00012169	5.95029	1.26538e-09	2.67545e-08	Spermatogenic only
C30G7.3	WBGene00044177	5.94694	1.31359e-09	2.77108e-08	Spermatogenic only
F37A4.5	WBGene00018135	5.24875	1.38112e-09	2.90693e-08	Spermatogenic only
acs-13	WBGene00022037	-1.01723	1.40827e-09	2.95737e-08	Oogenic only
hdl-2	WBGene00006409	6.81815	1.50152e-09	3.13899e-08	Spermatogenic only
ZK484.7	WBGene00022753	6.79508	1.51412e-09	3.15821e-08	Spermatogenic only
T22B3.3	WBGene00011911	4.70918	1.55551e-09	3.23727e-08	Oogenic and Spermatogenic
spe-47	WBGene00021271	4.3351	1.58779e-09	3.29706e-08	Spermatogenic only
C50E10.2	WBGene00016826	4.70501	1.60603e-09	3.3275e-08	Spermatogenic only
fut-1	WBGene00001505	2.68963	1.68781e-09	3.48139e-08	Spermatogenic only
W10C8.5	WBGene00021128	1.78905	1.70195e-09	3.48731e-08	Oogenic and Spermatogenic
gst-5	WBGene00001753	2.26647	1.69734e-09	3.48731e-08	Oogenic and Spermatogenic
C49C3.20	WBGene00185097	5.24259	1.71714e-09	3.51069e-08	Spermatogenic only
K07F5.6	WBGene00010634	7.35642	1.79748e-09	3.66685e-08	Spermatogenic only
C43G2.3	WBGene00016612	7.34175	1.80382e-09	3.67172e-08	Spermatogenic only
marc-3	WBGene00007643	-1.39434	1.82945e-09	3.71574e-08	Oogenic only
C34F11.5	WBGene00016416	6.77027	1.85346e-09	3.73996e-08	Spermatogenic only
Y55B1BR.2	WBGene00021912	1.80564	1.84604e-09	3.73996e-08	Oogenic and Spermatogenic
F42A9.7	WBGene00018336	4.1523	1.85229e-09	3.73996e-08	Spermatogenic only
C08F8.6	WBGene00007448	5.22121	1.90877e-09	3.84321e-08	Spermatogenic only
msd-2	WBGene00009682	4.05752	2.00921e-09	4.03668e-08	Oogenic and Spermatogenic
gln-2	WBGene00001603	6.71213	2.13235e-09	4.27484e-08	Spermatogenic only
C35A5.4	WBGene00007948	6.74428	2.20471e-09	4.41037e-08	Spermatogenic only
sma-1	WBGene00004855	1.15484	2.21055e-09	4.41254e-08	Oogenic and Spermatogenic
unc-84	WBGene00006816	-1.90089	2.48331e-09	4.93577e-08	Oogenic only
ZK418.2	WBGene00022732	4.39147	2.49518e-09	4.94878e-08	Spermatogenic only
F45D3.4	WBGene00009724	-1.6267	2.57462e-09	5.09545e-08	Spermatogenic only
D2062.6	WBGene00017058	5.89352	2.65709e-09	5.23634e-08	Oogenic and Spermatogenic
clp-6	WBGene00000546	2.80113	2.75042e-09	5.39734e-08	Spermatogenic only
C09B9.85	WBGene00220250	7.24779	2.97589e-09	5.82747e-08	Spermatogenic only
T23F6.3	WBGene00011951	6.65192	3.06733e-09	5.98128e-08	Spermatogenic only
R148.7	WBGene00020105	5.1359	3.10517e-09	6.04239e-08	Oogenic and Spermatogenic
Y39E4B.11	WBGene00012720	4.40958	3.13317e-09	6.08333e-08	Spermatogenic only
C01G5.4	WBGene00015306	6.66119	3.13932e-09	6.08333e-08	Oogenic and Spermatogenic
F11A10.6	WBGene00008687	1.09034	3.26135e-09	6.29353e-08	Oogenic and Spermatogenic
F34D10.9	WBGene00045484	3.65444	3.30603e-09	6.35333e-08	Spermatogenic only
C55C3.3	WBGene00016953	3.35748	3.31806e-09	6.36327e-08	Oogenic and Spermatogenic
obr-2	WBGene00008832	2.4303	3.43717e-09	6.57811e-08	Oogenic and Spermatogenic
F55C5.2	WBGene00010092	6.6454	3.55536e-09	6.7903e-08	Spermatogenic only
gpd-1	WBGene00001683	-1.50194	3.76371e-09	7.17347e-08	Oogenic only
gei-8	WBGene00001565	1.2978	3.82938e-09	7.28366e-08	Oogenic and Spermatogenic
Y47D3A.13	WBGene00012926	5.09875	4.38977e-09	8.33249e-08	Spermatogenic only
F02C9.1	WBGene00017172	6.59141	4.7759e-09	9.04692e-08	Spermatogenic only
F31E8.4	WBGene00017954	-2.6035	4.80009e-09	9.07422e-08	Oogenic only
elo-4	WBGene00001242	5.791	4.87571e-09	9.19844e-08	Oogenic and Spermatogenic
F53F4.13	WBGene00009995	-1.29419	4.93336e-09	9.28832e-08	Spermatogenic only
C31H1.5	WBGene00016288	4.66896	4.96505e-09	9.32906e-08	Spermatogenic only
Y66D12A.3	WBGene00013429	4.28837	4.9974e-09	9.37088e-08	Spermatogenic only
C27D8.1	WBGene00007777	3.72181	5.09594e-09	9.53639e-08	Spermatogenic only
F38H4.4	WBGene00009548	4.06267	5.12058e-09	9.56322e-08	Oogenic and Spermatogenic
Y22D7AR.12	WBGene00021265	4.69644	5.29098e-09	9.82217e-08	Spermatogenic only
M70.3	WBGene00019785	3.73161	5.43572e-09	1.00507e-07	Spermatogenic only
C54G4.3	WBGene00008313	4.27288	5.79825e-09	1.06997e-07	Spermatogenic only
Y48B6A.5	WBGene00012979	5.05517	6.04864e-09	1.11175e-07	Oogenic and Spermatogenic
R155.3	WBGene00020117	5.03788	6.07118e-09	1.11369e-07	Spermatogenic only
W03C9.8	WBGene00012223	5.07406	6.12993e-09	1.12225e-07	Spermatogenic only
K10C9.7	WBGene00019626	7.13598	6.17979e-09	1.12915e-07	Spermatogenic only
tba-1	WBGene00006528	-0.996069	6.38513e-09	1.16209e-07	Oogenic and Spermatogenic
fhod-1	WBGene00016735	2.13869	6.50979e-09	1.18246e-07	Spermatogenic only
B0280.11	WBGene00015106	4.0312	6.55514e-09	1.18837e-07	Spermatogenic only
C14B9.2	WBGene00015752	1.3713	6.73852e-09	1.21924e-07	Oogenic and Spermatogenic
mab-3	WBGene00003100	3.74459	6.80958e-09	1.2297e-07	Spermatogenic only
Y54E2A.7	WBGene00013192	6.51974	6.90955e-09	1.24504e-07	Spermatogenic only
puf-11	WBGene00022257	-1.17102	6.92133e-09	1.24504e-07	Oogenic only
icl-1	WBGene00001564	-1.12362	6.96879e-09	1.25115e-07	Spermatogenic only
msp-10	WBGene00003425	5.74883	7.05732e-09	1.2646e-07	Spermatogenic only
T05F1.8	WBGene00011493	4.63366	7.65213e-09	1.36591e-07	Spermatogenic only
T23F11.2	WBGene00011954	5.03129	7.83124e-09	1.39519e-07	Spermatogenic only
Y106G6G.4	WBGene00013713	4.63157	7.87641e-09	1.40055e-07	Spermatogenic only
set-2	WBGene00004782	0.950328	7.90097e-09	1.40223e-07	Oogenic only
ZK546.3	WBGene00022760	7.05866	8.294e-09	1.46638e-07	Spermatogenic only
D2062.7	WBGene00017059	5.68314	8.36562e-09	1.47533e-07	Oogenic and Spermatogenic
acp-2	WBGene00008802	2.98357	8.37642e-09	1.47533e-07	Spermatogenic only
F59A6.4	WBGene00019086	7.11277	8.53238e-09	1.49712e-07	Spermatogenic only
T05F1.2	WBGene00011489	-1.22703	8.57695e-09	1.5021e-07	Oogenic only
nspd-4	WBGene00020715	6.51256	8.90143e-09	1.55074e-07	Spermatogenic only
rmd-2	WBGene00007786	-1.07923	8.88689e-09	1.55074e-07	Oogenic only
F54C9.14	WBGene00175035	3.77686	8.90482e-09	1.55074e-07	Spermatogenic only
H06I04.5	WBGene00019169	6.47189	9.19392e-09	1.5951e-07	Spermatogenic only
ZK1248.5	WBGene00022876	5.6339	9.62346e-09	1.66341e-07	Spermatogenic only
F57F4.1	WBGene00019015	3.89176	1.01836e-08	1.75696e-07	Spermatogenic only
Y53F4B.11	WBGene00013158	3.15994	1.10877e-08	1.90585e-07	Spermatogenic only
H38K22.7	WBGene00044912	7.00447	1.11626e-08	1.91519e-07	Spermatogenic only
T08B2.12	WBGene00020350	3.90819	1.1374e-08	1.94785e-07	Spermatogenic only
ZK1010.5	WBGene00014179	3.93253	1.14558e-08	1.95825e-07	Spermatogenic only
fog-3	WBGene00001483	4.75428	1.21075e-08	2.06206e-07	Oogenic and Spermatogenic
ima-2	WBGene00002073	-0.977742	1.22094e-08	2.07561e-07	Oogenic only
T27C10.8	WBGene00077519	4.54232	1.28576e-08	2.1818e-07	Spermatogenic only
cbs-2	WBGene00018783	5.62258	1.29069e-08	2.18617e-07	Oogenic and Spermatogenic
ZK1053.2	WBGene00014197	5.62455	1.29564e-08	2.19055e-07	Oogenic and Spermatogenic
M110.7	WBGene00010915	6.44106	1.29884e-08	2.19197e-07	Spermatogenic only
Y69E1A.8	WBGene00013478	5.61066	1.35318e-08	2.2754e-07	Spermatogenic only
nlp-4	WBGene00003742	5.00184	1.36797e-08	2.29612e-07	Spermatogenic only
F40H6.1	WBGene00018253	3.79796	1.38459e-08	2.31981e-07	Spermatogenic only
hpo-32	WBGene00015313	0.988114	1.39018e-08	2.32498e-07	Oogenic and Spermatogenic
ZC250.5	WBGene00045306	6.4317	1.39412e-08	2.32737e-07	Spermatogenic only
Y48G1C.5	WBGene00021678	2.7385	1.39747e-08	2.32879e-07	Spermatogenic only
msp-78	WBGene00003465	4.13151	1.43355e-08	2.38463e-07	Oogenic and Spermatogenic
F44G3.7	WBGene00009708	4.25937	1.43904e-08	2.38947e-07	Spermatogenic only
F58D2.2	WBGene00010241	5.63773	1.46108e-08	2.42174e-07	Spermatogenic only
F54C8.1	WBGene00010035	4.2	1.46585e-08	2.42531e-07	Spermatogenic only
T06C10.3	WBGene00020289	6.94821	1.53071e-08	2.52813e-07	Spermatogenic only
sst-20	WBGene00006058	5.60497	1.56883e-08	2.5819e-07	Spermatogenic only
C04G2.5	WBGene00007306	4.96435	1.72395e-08	2.83217e-07	Spermatogenic only
F57H12.5	WBGene00019020	6.94911	1.73861e-08	2.8512e-07	Spermatogenic only
F02E9.3	WBGene00008529	4.92045	1.8697e-08	3.05538e-07	Spermatogenic only
R10E4.7	WBGene00011203	2.926	1.87738e-08	3.06254e-07	Oogenic and Spermatogenic
T04F3.3	WBGene00011438	4.18965	1.95727e-08	3.18726e-07	Spermatogenic only
nkb-2	WBGene00008074	6.35215	1.99846e-08	3.24864e-07	Spermatogenic only
C55A6.4	WBGene00008333	2.35436	2.00628e-08	3.25564e-07	Spermatogenic only
T28D9.1	WBGene00020894	0.885467	2.02518e-08	3.28058e-07	Oogenic and Spermatogenic
Y43C5B.3	WBGene00012786	5.6214	2.04814e-08	3.30949e-07	Spermatogenic only
Y69A2AR.14	WBGene00022085	6.35314	2.05373e-08	3.30949e-07	Spermatogenic only
tag-164	WBGene00006509	3.63412	2.05088e-08	3.30949e-07	Spermatogenic only
Y57G7A.5	WBGene00021968	4.97772	2.07617e-08	3.33987e-07	Spermatogenic only
sex-1	WBGene00004786	-2.47376	2.10274e-08	3.37092e-07	Oogenic only
esyt-2	WBGene00020443	1.80784	2.15064e-08	3.44176e-07	Oogenic and Spermatogenic
lmd-1	WBGene00009665	1.18985	2.22807e-08	3.55954e-07	Oogenic only
T08G3.4	WBGene00011617	5.53248	2.28539e-08	3.63859e-07	Spermatogenic only
F11G11.4	WBGene00017384	4.49983	2.29257e-08	3.64377e-07	Spermatogenic only
K01D12.7	WBGene00010466	4.90159	2.3e-08	3.64933e-07	Oogenic and Spermatogenic
M70.1	WBGene00019783	4.93786	2.33454e-08	3.68905e-07	Spermatogenic only
Y37D8A.5	WBGene00012547	6.31868	2.33696e-08	3.68905e-07	Spermatogenic only
F54H12.7	WBGene00044633	4.88091	2.36236e-08	3.72283e-07	Spermatogenic only
F26A3.5	WBGene00009143	5.52679	2.42526e-08	3.81546e-07	Spermatogenic only
F58A6.5	WBGene00019024	5.55058	2.47209e-08	3.87722e-07	Spermatogenic only
T03F6.6	WBGene00011401	5.5513	2.47286e-08	3.87722e-07	Spermatogenic only
lgg-1	WBGene00002980	-0.838442	2.50761e-08	3.92506e-07	Oogenic and Spermatogenic
col-149	WBGene00000722	2.15591	2.56679e-08	4.00419e-07	Spermatogenic only
H04J21.1	WBGene00019150	6.29898	2.58914e-08	4.02583e-07	Spermatogenic only
Y46G5A.22	WBGene00012912	4.87519	2.58934e-08	4.02583e-07	Spermatogenic only
C18H7.4	WBGene00015994	4.48067	2.63086e-08	4.08355e-07	Spermatogenic only
Y46G5A.14	WBGene00012905	4.43643	2.65264e-08	4.10363e-07	Spermatogenic only
F21H7.2	WBGene00009028	5.50864	2.68038e-08	4.13965e-07	Spermatogenic only
pme-5	WBGene00004053	1.35625	2.70176e-08	4.16574e-07	Oogenic and Spermatogenic
R09E10.2	WBGene00011172	4.44602	2.96502e-08	4.55651e-07	Oogenic and Spermatogenic
T28B8.4	WBGene00012115	4.89024	2.97306e-08	4.56131e-07	Spermatogenic only
ZK1225.4	WBGene00014238	4.87993	3.06502e-08	4.6792e-07	Spermatogenic only
F47B3.7	WBGene00018531	6.2837	3.06268e-08	4.6792e-07	Spermatogenic only
mcm-2	WBGene00003154	-1.27553	3.16675e-08	4.80291e-07	Oogenic only
mtm-3	WBGene00003476	-0.856425	3.16312e-08	4.80291e-07	Oogenic only
Y50E8A.12	WBGene00013055	4.17214	3.15212e-08	4.80291e-07	Spermatogenic only
F56D6.22	WBGene00235359	6.3084	3.16372e-08	4.80291e-07	Spermatogenic only
F52D2.12	WBGene00219451	-2.46537	3.20492e-08	4.85287e-07	Oogenic only
wht-8	WBGene00012925	6.29057	3.21343e-08	4.85782e-07	Spermatogenic only
col-129	WBGene00000703	1.09707	3.22053e-08	4.86064e-07	Spermatogenic only
cey-2	WBGene00000473	-0.808646	3.33455e-08	5.0083e-07	Oogenic and Spermatogenic
dut-1	WBGene00010609	-0.956528	3.34805e-08	5.02046e-07	Oogenic only
htas-1	WBGene00014240	4.46599	3.3974e-08	5.08623e-07	Spermatogenic only
C55A6.3	WBGene00008332	3.62724	3.41189e-08	5.09269e-07	Spermatogenic only
D1081.5	WBGene00008383	5.50054	3.41268e-08	5.09269e-07	Spermatogenic only
B0379.7	WBGene00007159	5.51556	3.42313e-08	5.10008e-07	Spermatogenic only
K06A1.2	WBGene00019425	5.49158	3.43035e-08	5.10264e-07	Spermatogenic only
ZK930.7	WBGene00014157	3.93279	3.48232e-08	5.17166e-07	Spermatogenic only
egg-6	WBGene00010621	-0.833017	3.67479e-08	5.43144e-07	Oogenic only
Y71G12B.30	WBGene00044347	4.46691	3.69526e-08	5.453e-07	Oogenic and Spermatogenic
F40F9.3	WBGene00009581	6.24006	3.71147e-08	5.46824e-07	Spermatogenic only
dhhc-12	WBGene00010323	6.26095	3.7369e-08	5.48828e-07	Spermatogenic only
F44D12.8	WBGene00009685	6.2279	3.86688e-08	5.67021e-07	Spermatogenic only
oac-50	WBGene00020864	5.5127	3.99587e-08	5.83171e-07	Spermatogenic only
C32D5.4	WBGene00016312	5.4584	4.05284e-08	5.90556e-07	Spermatogenic only
Y43F8C.5	WBGene00012827	3.88443	4.07032e-08	5.92175e-07	Oogenic and Spermatogenic
T21G5.1	WBGene00020659	4.88412	4.17643e-08	6.0561e-07	Spermatogenic only
Y17G9B.9	WBGene00021206	-0.875452	4.5081e-08	6.51779e-07	Oogenic only
F58G1.3	WBGene00010265	6.20072	4.58295e-08	6.60542e-07	Spermatogenic only
col-73	WBGene00000649	2.59572	4.61469e-08	6.64086e-07	Oogenic and Spermatogenic
sfxn-1.4	WBGene00008137	2.83609	4.7936e-08	6.877e-07	Oogenic and Spermatogenic
K09E4.1	WBGene00010719	3.99303	4.87065e-08	6.97675e-07	Spermatogenic only
F35E2.5	WBGene00009412	5.39022	4.93226e-08	7.05412e-07	Spermatogenic only
B0511.11	WBGene00015236	2.55141	5.20027e-08	7.39186e-07	Spermatogenic only
C47E12.10	WBGene00008153	6.19434	5.22077e-08	7.40966e-07	Spermatogenic only
C27C12.3	WBGene00007773	-1.68959	5.58727e-08	7.90564e-07	Oogenic only
E03H12.7	WBGene00017114	4.80323	5.62638e-08	7.94887e-07	Spermatogenic only
W03D8.10	WBGene00020991	5.44128	5.64577e-08	7.96414e-07	Spermatogenic only
F52H3.6	WBGene00009948	4.37209	6.09011e-08	8.55196e-07	Spermatogenic only
tat-3	WBGene00012360	0.81165	6.29575e-08	8.80077e-07	Oogenic and Spermatogenic
C28C12.1	WBGene00016177	3.27538	6.80318e-08	9.48155e-07	Spermatogenic only
ZC477.2	WBGene00022617	5.35683	7.08152e-08	9.85467e-07	Spermatogenic only
lin-3	WBGene00002992	-0.876575	7.16562e-08	9.9419e-07	Oogenic only
F56B3.6	WBGene00018930	4.77851	7.18171e-08	9.94934e-07	Spermatogenic only
T20F5.5	WBGene00020627	3.38474	7.27774e-08	1.00674e-06	Oogenic and Spermatogenic
C33H5.16	WBGene00016382	6.11771	7.60302e-08	1.04949e-06	Spermatogenic only
Y53F4B.19	WBGene00013165	4.37062	7.6094e-08	1.04949e-06	Spermatogenic only
ikke-1	WBGene00011299	-0.838505	7.66117e-08	1.0535e-06	Oogenic only
ZK858.8	WBGene00014121	4.73345	7.67595e-08	1.05397e-06	Spermatogenic only
Y47D3A.31	WBGene00012937	4.40766	7.74834e-08	1.06234e-06	Spermatogenic only
T15B12.2	WBGene00020531	4.76061	8.03696e-08	1.09866e-06	Spermatogenic only
C29F5.3	WBGene00016212	6.113	8.0949e-08	1.10495e-06	Spermatogenic only
F21D9.2	WBGene00009016	4.75149	8.30958e-08	1.13259e-06	Spermatogenic only
F26D2.10	WBGene00009149	5.35606	8.4261e-08	1.14513e-06	Oogenic and Spermatogenic
Y67A6A.1	WBGene00013449	5.39855	8.42622e-08	1.14513e-06	Spermatogenic only
C09B9.7	WBGene00015630	6.08522	8.45205e-08	1.14696e-06	Spermatogenic only
F53G12.8	WBGene00018773	5.37532	8.51425e-08	1.15371e-06	Spermatogenic only
Y39B6A.25	WBGene00012684	5.3555	8.61522e-08	1.16569e-06	Spermatogenic only
kin-24	WBGene00002206	6.09553	8.64133e-08	1.16752e-06	Spermatogenic only
gld-1	WBGene00001595	-1.2621	8.75111e-08	1.18064e-06	Oogenic only
ctg-2	WBGene00011756	2.48911	8.7699e-08	1.18145e-06	Oogenic and Spermatogenic
oac-23	WBGene00018143	6.09665	8.8327e-08	1.18819e-06	Spermatogenic only
F54H12.8	WBGene00045247	4.71962	8.91895e-08	1.19806e-06	Spermatogenic only
F35E2.9	WBGene00009416	4.32157	8.97695e-08	1.2041e-06	Spermatogenic only
C32E12.1	WBGene00016327	5.32905	9.05669e-08	1.21305e-06	Spermatogenic only
mps-3	WBGene00020282	5.34668	9.52389e-08	1.27195e-06	Spermatogenic only
C06A1.3	WBGene00007354	6.08122	9.69518e-08	1.29297e-06	Spermatogenic only
ptr-2	WBGene00004217	-1.22457	9.86821e-08	1.31416e-06	Oogenic only
F41G3.5	WBGene00018301	5.32533	1.00597e-07	1.33773e-06	Spermatogenic only
ssp-35	WBGene00010091	4.27168	1.01505e-07	1.34788e-06	Spermatogenic only
wht-5	WBGene00008950	5.32151	1.0459e-07	1.38489e-06	Spermatogenic only
best-26	WBGene00014103	5.311	1.07329e-07	1.41309e-06	Spermatogenic only
ZK84.2	WBGene00022650	5.37204	1.11851e-07	1.46638e-06	Spermatogenic only
col-39	WBGene00000616	2.71081	1.13365e-07	1.48205e-06	Oogenic and Spermatogenic
M176.9	WBGene00014813	6.03964	1.21208e-07	1.5757e-06	Spermatogenic only
wht-4	WBGene00017179	4.32114	1.22729e-07	1.59103e-06	Spermatogenic only
F36H12.4	WBGene00018120	5.34068	1.24891e-07	1.61454e-06	Spermatogenic only
Y1A5A.1	WBGene00012379	5.28385	1.25409e-07	1.61898e-06	Spermatogenic only
ftn-2	WBGene00001501	1.12521	1.29739e-07	1.67023e-06	Spermatogenic only
B0207.1	WBGene00015026	6.04499	1.36452e-07	1.7518e-06	Spermatogenic only
C27D8.2	WBGene00007778	5.30485	1.38006e-07	1.76724e-06	Spermatogenic only
ZK1098.6	WBGene00014223	3.17102	1.41088e-07	1.80383e-06	Spermatogenic only
pcn-1	WBGene00003955	-1.11818	1.44299e-07	1.83729e-06	Oogenic and Spermatogenic
hsp-4	WBGene00002008	0.827016	1.52226e-07	1.93292e-06	Oogenic and Spermatogenic
F10D7.5	WBGene00017342	-1.6682	1.79919e-07	2.25373e-06	Oogenic only
toca-2	WBGene00010663	1.16938	2.24514e-07	2.74564e-06	Oogenic only
W02D7.4	WBGene00020940	2.89987	2.41182e-07	2.94173e-06	Spermatogenic only
nasp-2	WBGene00008218	-1.25187	2.61293e-07	3.1745e-06	Oogenic only
F27D4.6	WBGene00009190	2.18152	2.64741e-07	3.208e-06	Spermatogenic only
F28F8.9	WBGene00044188	-1.36429	2.86997e-07	3.42845e-06	Oogenic only
mbk-2	WBGene00003150	-0.759509	3.02205e-07	3.58247e-06	Oogenic only
cyb-2.2	WBGene00000867	-0.866871	3.44031e-07	4.03194e-06	Oogenic only
miz-1	WBGene00011259	-1.19366	3.45513e-07	4.0442e-06	Oogenic only
egg-3	WBGene00009701	-1.09754	3.55403e-07	4.13908e-06	Oogenic only
col-77	WBGene00000653	3.32461	3.63844e-07	4.23208e-06	Spermatogenic only
ufm-1	WBGene00044324	0.890772	3.96489e-07	4.56602e-06	Oogenic only
kin-14	WBGene00002198	2.72619	4.00454e-07	4.60597e-06	Oogenic and Spermatogenic
gcy-12	WBGene00001538	1.40778	4.43901e-07	5.07425e-06	Spermatogenic only
C14B1.3	WBGene00007574	1.71729	4.68778e-07	5.33235e-06	Oogenic and Spermatogenic
cyb-2.1	WBGene00000866	-0.893031	5.1299e-07	5.79579e-06	Oogenic only
C05C10.5	WBGene00007332	-1.26407	5.33883e-07	5.99215e-06	Oogenic only
col-92	WBGene00000667	1.94671	5.47322e-07	6.12816e-06	Oogenic and Spermatogenic
F40F4.7	WBGene00018238	-1.48752	5.62021e-07	6.26252e-06	Oogenic only
lsm-1	WBGene00003076	-1.20089	5.63173e-07	6.26783e-06	Oogenic only
Y53C10A.6	WBGene00013137	-1.46477	5.95748e-07	6.60661e-06	Oogenic only
act-5	WBGene00000067	1.00259	6.30463e-07	6.95833e-06	Oogenic and Spermatogenic
set-16	WBGene00011729	-0.766697	6.53039e-07	7.19894e-06	Oogenic only
B0261.6	WBGene00015094	4.75908	7.50076e-07	8.1716e-06	Spermatogenic only
W09C3.7	WBGene00021114	1.46837	7.5385e-07	8.20309e-06	Spermatogenic only
cth-1	WBGene00009048	2.39636	8.02324e-07	8.63941e-06	Spermatogenic only
T16G1.9	WBGene00011802	1.13484	8.28448e-07	8.88977e-06	Oogenic and Spermatogenic
spsb-2	WBGene00021596	-1.92785	8.35094e-07	8.94042e-06	Oogenic only
C53D5.1	WBGene00016902	1.27371	8.34315e-07	8.94042e-06	Oogenic and Spermatogenic
F21D5.1	WBGene00009006	-1.03795	8.81785e-07	9.3754e-06	Oogenic only
ugt-62	WBGene00010904	1.74334	9.0198e-07	9.5682e-06	Oogenic and Spermatogenic
rpn-6.2	WBGene00010309	1.71571	9.09642e-07	9.63847e-06	Oogenic and Spermatogenic
egg-4	WBGene00020652	-1.28029	9.45101e-07	9.99137e-06	Oogenic only
Y39E4B.5	WBGene00012716	-0.860845	9.62759e-07	1.01643e-05	Oogenic only
Y54E5A.2	WBGene00013198	2.70937	9.72604e-07	1.02355e-05	Spermatogenic only
T01B11.2	WBGene00020139	1.47024	1.00204e-06	1.05096e-05	Spermatogenic only
imp-1	WBGene00007979	-0.800252	1.02107e-06	1.0697e-05	Oogenic only
Y47D9A.1	WBGene00021628	0.891102	1.03228e-06	1.0778e-05	Oogenic only
C38H2.2	WBGene00008019	1.60002	1.05178e-06	1.09517e-05	Spermatogenic only
cdh-4	WBGene00000396	-1.31565	1.0507e-06	1.09517e-05	Oogenic only
F39B2.1	WBGene00009553	-0.819849	1.15239e-06	1.18193e-05	Oogenic and Spermatogenic
obr-4	WBGene00016331	0.832194	1.16915e-06	1.19385e-05	Oogenic only
ifet-1	WBGene00004132	-0.998125	1.18257e-06	1.20622e-05	Oogenic only
fem-3	WBGene00001413	-0.971262	1.27629e-06	1.29047e-05	Oogenic only
mcm-5	WBGene00003157	-1.05915	1.32282e-06	1.33235e-05	Oogenic only
F16B12.6	WBGene00008882	-1.65633	1.33738e-06	1.34424e-05	Oogenic only
C14B1.9	WBGene00007580	-1.03789	1.39266e-06	1.38847e-05	Oogenic only
col-133	WBGene00000707	2.78147	1.66245e-06	1.6381e-05	Spermatogenic only
W02D9.2	WBGene00012208	1.00888	1.69457e-06	1.66621e-05	Oogenic only
T05G5.9	WBGene00011503	0.97259	1.81949e-06	1.77214e-05	Oogenic only
aat-6	WBGene00000007	2.47652	1.91747e-06	1.85976e-05	Spermatogenic only
F22B8.7	WBGene00009049	2.22736	2.10808e-06	2.02333e-05	Oogenic and Spermatogenic
mlcd-1	WBGene00009439	1.10884	2.39212e-06	2.2773e-05	Oogenic and Spermatogenic
exl-1	WBGene00001371	1.95299	2.50728e-06	2.37233e-05	Oogenic and Spermatogenic
ZK637.14	WBGene00014031	2.2143	2.51673e-06	2.3773e-05	Oogenic and Spermatogenic
tdc-1	WBGene00006562	-0.862577	2.89934e-06	2.68579e-05	Oogenic only
F28H1.1	WBGene00017908	-1.67025	3.15211e-06	2.88539e-05	Oogenic only
cdk-9	WBGene00000410	0.765895	3.36201e-06	3.06243e-05	Oogenic only
F41F3.3	WBGene00018297	2.4366	3.40882e-06	3.10202e-05	Oogenic and Spermatogenic
cgh-1	WBGene00000479	-0.918621	3.43432e-06	3.12217e-05	Oogenic and Spermatogenic
ptc-1	WBGene00004208	-0.669993	3.67055e-06	3.31743e-05	Oogenic only
C56A3.8	WBGene00008346	1.71875	3.81366e-06	3.43674e-05	Oogenic and Spermatogenic
F25B5.3	WBGene00017775	0.883137	4.05137e-06	3.63332e-05	Oogenic and Spermatogenic
T13C2.6	WBGene00020481	-0.683377	4.12283e-06	3.69027e-05	Oogenic only
R07B7.4	WBGene00011088	2.47908	4.2378e-06	3.78585e-05	Spermatogenic only
R01B10.4	WBGene00019806	0.724569	4.46213e-06	3.95582e-05	Oogenic only
R04F11.3	WBGene00011016	0.893146	4.57941e-06	4.05593e-05	Oogenic and Spermatogenic
trcs-1	WBGene00009186	-0.701584	4.68875e-06	4.14091e-05	Oogenic only
F44E2.10	WBGene00018423	0.934494	4.75147e-06	4.19231e-05	Oogenic only
Y76A2B.4	WBGene00013576	-0.896547	4.9779e-06	4.36719e-05	Oogenic only
wee-1.3	WBGene00006940	0.711005	5.00231e-06	4.38033e-05	Oogenic and Spermatogenic
daf-2	WBGene00000898	-0.930896	5.10132e-06	4.44605e-05	Oogenic only
tag-349	WBGene00013538	-1.21655	5.20647e-06	4.52546e-05	Oogenic only
Y39E4A.3	WBGene00012713	0.731938	5.62775e-06	4.84572e-05	Oogenic only
sax-3	WBGene00004729	-1.46231	5.66177e-06	4.87048e-05	Oogenic only
sygl-1	WBGene00012104	-1.11379	6.02483e-06	5.13993e-05	Oogenic only
fbxa-215	WBGene00012879	-1.31574	6.06386e-06	5.16848e-05	Oogenic only
C55B7.3	WBGene00016942	2.05304	6.17607e-06	5.24006e-05	Spermatogenic only
yop-1	WBGene00022127	-0.871877	6.28572e-06	5.31851e-05	Oogenic and Spermatogenic
Y54G11A.19	WBGene00235256	1.06316	6.51804e-06	5.48012e-05	Oogenic and Spermatogenic
sqv-5	WBGene00005023	-0.742429	6.56574e-06	5.51522e-05	Oogenic only
B0024.13	WBGene00007102	1.03337	6.59001e-06	5.52561e-05	Oogenic only
K08E3.5	WBGene00010665	-0.737158	6.73254e-06	5.62479e-05	Oogenic only
Y71F9AL.4	WBGene00022110	2.01605	7.66197e-06	6.33854e-05	Spermatogenic only
acs-2	WBGene00009221	-1.33073	7.76845e-06	6.39811e-05	Oogenic and Spermatogenic
hosl-1	WBGene00016704	-1.92261	7.90356e-06	6.50362e-05	Oogenic only
DY3.8	WBGene00008440	-0.918295	8.01723e-06	6.57966e-05	Oogenic only
cey-3	WBGene00000474	-0.714785	8.04727e-06	6.59847e-05	Oogenic only
F52A8.5	WBGene00009918	0.78408	8.56846e-06	6.97042e-05	Oogenic and Spermatogenic
klp-16	WBGene00002226	-0.777967	9.94885e-06	7.96767e-05	Oogenic only
Y75B12B.1	WBGene00013567	-1.61028	1.01566e-05	8.10969e-05	Oogenic only
mom-2	WBGene00003395	-0.944652	1.01611e-05	8.10969e-05	Oogenic only
lit-1	WBGene00003048	-0.724914	1.0372e-05	8.25665e-05	Oogenic only
sodh-1	WBGene00010790	-1.11855	1.04262e-05	8.29275e-05	Oogenic and Spermatogenic
pqn-65	WBGene00004148	-1.18917	1.04866e-05	8.32651e-05	Oogenic only
lin-53	WBGene00003036	-0.988588	1.12766e-05	8.91563e-05	Oogenic only
mcm-7	WBGene00003159	-0.705404	1.15244e-05	9.09605e-05	Oogenic only
rmd-1	WBGene00011501	-0.987643	1.22545e-05	9.61509e-05	Oogenic and Spermatogenic
perm-2	WBGene00016636	-0.770421	1.26828e-05	9.93436e-05	Oogenic and Spermatogenic
F57B10.4	WBGene00019002	0.76519	1.27293e-05	9.95398e-05	Oogenic only
T23G5.2	WBGene00011962	0.761138	1.29724e-05	0.000101355	Oogenic only
inos-1	WBGene00012148	-0.84391	1.31892e-05	0.000102962	Oogenic and Spermatogenic
dpy-27	WBGene00001086	-1.49193	1.33159e-05	0.000103689	Oogenic only
hmg-11	WBGene00001976	-1.68448	1.38275e-05	0.000107224	Oogenic only
Y4C6A.3	WBGene00021153	-1.49519	1.40813e-05	0.000109009	Oogenic only
aak-2	WBGene00020142	-1.09703	1.42253e-05	0.000109904	Oogenic only
C18H2.1	WBGene00015988	1.83273	1.47248e-05	0.000113326	Spermatogenic only
F58H1.6	WBGene00010289	4.41125	1.48104e-05	0.000113706	Oogenic and Spermatogenic
laat-1	WBGene00021546	-0.820127	1.54209e-05	0.000117711	Oogenic only
snf-9	WBGene00004908	1.50716	1.62745e-05	0.00012382	Spermatogenic only
tgt-2	WBGene00006567	-1.39651	1.75361e-05	0.000132549	Oogenic only
Y110A2AR.1	WBGene00022452	0.789967	1.76856e-05	0.000133462	Oogenic and Spermatogenic
glna-3	WBGene00009271	2.13532	1.77975e-05	0.000134088	Oogenic and Spermatogenic
lmp-1	WBGene00003053	-0.913804	1.82825e-05	0.000137519	Oogenic and Spermatogenic
nhr-4	WBGene00003603	-1.84836	1.90988e-05	0.000143195	Oogenic only
ppk-3	WBGene00004089	-1.43105	2.05744e-05	0.000153761	Oogenic only
Y65B4A.10	WBGene00220188	-1.43251	2.06589e-05	0.000154169	Oogenic and Spermatogenic
ndx-2	WBGene00003579	2.11666	2.22397e-05	0.000164881	Spermatogenic only
cam-1	WBGene00000289	-1.49423	2.28948e-05	0.000169296	Oogenic only
ketn-1	WBGene00004130	0.629091	2.3384e-05	0.000172323	Oogenic and Spermatogenic
eef-1A.2	WBGene00001169	0.709177	2.34938e-05	0.000172934	Oogenic only
mcu-1	WBGene00019296	0.713885	2.48111e-05	0.000182186	Oogenic only
exc-9	WBGene00017644	2.1824	2.61929e-05	0.000190984	Oogenic and Spermatogenic
T07F10.1	WBGene00011587	1.15669	2.7562e-05	0.000200337	Spermatogenic only
F11A5.9	WBGene00008677	-1.26144	2.8104e-05	0.000204117	Oogenic only
spdl-1	WBGene00015515	0.902377	2.87178e-05	0.000207924	Oogenic and Spermatogenic
F56A8.4	WBGene00010140	1.08617	2.93365e-05	0.000211908	Oogenic only
mei-2	WBGene00003184	-1.01206	2.97803e-05	0.000214779	Oogenic only
T03F6.3	WBGene00011399	-0.941081	3.0496e-05	0.00021977	Oogenic only
ZK632.9	WBGene00014016	-0.74481	3.12611e-05	0.00022476	Oogenic and Spermatogenic
pgl-1	WBGene00003992	-0.724471	3.20557e-05	0.000229761	Oogenic only
cyn-5	WBGene00000881	0.794411	3.28511e-05	0.000234557	Oogenic and Spermatogenic
R06F6.8	WBGene00011071	0.699036	3.3072e-05	0.000235952	Oogenic only
spd-5	WBGene00004955	0.770098	3.42375e-05	0.000243333	Oogenic only
R07E4.5	WBGene00019938	-1.66169	3.43909e-05	0.000244236	Oogenic only
Y54E2A.8	WBGene00013193	1.10204	3.50954e-05	0.000248479	Oogenic and Spermatogenic
rpl-11.2	WBGene00004423	0.933853	3.51432e-05	0.000248627	Oogenic and Spermatogenic
lip-1	WBGene00003043	-0.701201	3.53661e-05	0.000250013	Oogenic only
K11H12.8	WBGene00019664	0.796608	3.79731e-05	0.000267223	Oogenic and Spermatogenic
daf-1	WBGene00000897	-1.10668	3.86516e-05	0.00027107	Oogenic only
htp-3	WBGene00002034	0.745883	3.92551e-05	0.000274993	Oogenic only
F30F8.10	WBGene00009277	1.09107	3.94141e-05	0.000275691	Oogenic only
bre-1	WBGene00000266	1.59712	4.17001e-05	0.000289499	Spermatogenic only
set-25	WBGene00012802	-0.821073	4.60111e-05	0.000317056	Oogenic only
ani-2	WBGene00019608	0.675461	4.66436e-05	0.000320938	Oogenic only
sem-5	WBGene00004774	-1.57487	4.717e-05	0.00032384	Oogenic and Spermatogenic
atg-11	WBGene00020334	-1.45057	4.81751e-05	0.000329765	Oogenic only
fncm-1	WBGene00018908	1.04989	4.84609e-05	0.000331233	Oogenic only
cpt-1	WBGene00012907	-0.679128	5.02625e-05	0.000342287	Oogenic and Spermatogenic
C27D9.1	WBGene00016163	-0.871306	5.24542e-05	0.000355387	Oogenic only
Y71H2B.2	WBGene00022192	0.850443	5.268e-05	0.000356396	Oogenic only
ekl-5	WBGene00012512	-1.25954	5.41024e-05	0.00036522	Oogenic only
C14B1.2	WBGene00007573	-0.98934	5.55471e-05	0.000374157	Oogenic only
F26F4.8	WBGene00005011	1.2088	5.58847e-05	0.000376158	Oogenic and Spermatogenic
cht-3	WBGene00016084	-0.753864	5.78254e-05	0.000388376	Oogenic only
cth-2	WBGene00022856	0.722287	5.91298e-05	0.000396277	Oogenic and Spermatogenic
C39D10.7	WBGene00016534	-0.709364	6.05968e-05	0.000404647	Spermatogenic only
sdc-2	WBGene00004746	-1.50716	6.52311e-05	0.00043386	Oogenic only
zip-2	WBGene00019327	-0.926192	6.5712e-05	0.000436606	Spermatogenic only
F18C5.10	WBGene00017563	-0.938358	6.96743e-05	0.000460953	Oogenic and Spermatogenic
puf-6	WBGene00004242	-0.902544	7.1662e-05	0.000473178	Oogenic only
cec-3	WBGene00011636	0.756069	7.21877e-05	0.000476223	Oogenic only
nra-3	WBGene00007651	-1.28172	7.56144e-05	0.000497415	Oogenic only
prom-1	WBGene00009173	0.57524	7.57814e-05	0.000498161	Oogenic and Spermatogenic
R02D3.1	WBGene00019819	0.722452	7.58429e-05	0.000498212	Oogenic and Spermatogenic
nhr-46	WBGene00003636	-1.05863	7.74828e-05	0.000507906	Oogenic only
skpt-1	WBGene00018613	-0.759155	7.76363e-05	0.000508553	Oogenic only
F43G9.3	WBGene00009666	0.746061	8.59618e-05	0.000561504	Oogenic and Spermatogenic
ram-2	WBGene00004300	1.24182	8.89517e-05	0.000580625	Oogenic and Spermatogenic
F56H9.2	WBGene00010174	0.91089	8.98974e-05	0.000586387	Oogenic and Spermatogenic
ZK669.4	WBGene00014054	0.603224	9.00533e-05	0.000586991	Oogenic and Spermatogenic
bmk-1	WBGene00000257	0.853876	9.23638e-05	0.000601629	Oogenic and Spermatogenic
lys-2	WBGene00003091	0.969088	9.4778e-05	0.000616057	Spermatogenic only
arl-8	WBGene00000192	-0.71836	9.87607e-05	0.000639705	Oogenic only
rab-5	WBGene00004268	-0.615659	0.000100091	0.000647869	Oogenic and Spermatogenic
kca-1	WBGene00015698	-0.725464	0.000103264	0.000667012	Oogenic only
his-61	WBGene00001935	-1.56644	0.000103755	0.000669715	Oogenic only
dsb-2	WBGene00194892	0.837702	0.000104765	0.000675765	Oogenic only
perm-4	WBGene00016638	-0.626052	0.000111103	0.000712895	Oogenic and Spermatogenic
T24H10.4	WBGene00012002	-1.27167	0.000111135	0.000712895	Oogenic only
mcm-4	WBGene00003156	-0.896164	0.000111576	0.000715227	Oogenic only
F52B5.2	WBGene00009921	-0.957936	0.000113087	0.000724412	Oogenic only
T04C4.1	WBGene00020208	-0.958409	0.000115713	0.000738685	Oogenic only
acdh-11	WBGene00012860	0.781798	0.00012148	0.000773373	Oogenic only
unc-26	WBGene00006763	-0.887245	0.000126522	0.000801622	Oogenic only
C06B3.6	WBGene00007365	-1.5281	0.000130034	0.000822193	Oogenic and Spermatogenic
col-81	WBGene00000657	0.885077	0.000134897	0.000850623	Spermatogenic only
crt-1	WBGene00000802	0.566421	0.000136627	0.000859582	Oogenic and Spermatogenic
F17C11.4	WBGene00008915	-1.28812	0.000136689	0.000859582	Oogenic and Spermatogenic
nep-17	WBGene00010070	0.833158	0.00013663	0.000859582	Oogenic and Spermatogenic
acl-9	WBGene00022646	0.879986	0.000137161	0.00086197	Oogenic and Spermatogenic
T27F6.7	WBGene00012106	-0.661667	0.000139696	0.000876715	Oogenic only
catp-7	WBGene00022010	0.863249	0.000145574	0.000912367	Oogenic and Spermatogenic
B0393.3	WBGene00007168	-0.893423	0.000147557	0.000924174	Oogenic only
mcm-3	WBGene00003155	-0.635741	0.000152072	0.000951166	Oogenic only
F21A10.2	WBGene00008999	-1.07056	0.000155201	0.000970082	Oogenic only
his-62	WBGene00001936	-1.04916	0.000166755	0.0010402	Oogenic and Spermatogenic
F25E5.1	WBGene00017782	-1.25921	0.0001691	0.00105412	Oogenic only
R05D7.5	WBGene00011030	0.824688	0.000169722	0.00105729	Oogenic and Spermatogenic
spin-1	WBGene00007549	1.6396	0.000171819	0.00106892	Spermatogenic only
cdc-37	WBGene00021097	0.705952	0.000172023	0.00106947	Oogenic and Spermatogenic
C11H1.3	WBGene00007529	-1.57385	0.000174491	0.00108409	Oogenic only
ZC250.4	WBGene00045305	1.26515	0.000175559	0.00108999	Oogenic and Spermatogenic
zif-1	WBGene00006977	-0.649243	0.000176992	0.00109815	Oogenic only
C34C6.4	WBGene00007917	1.09804	0.000177913	0.00110313	Oogenic and Spermatogenic
lig-1	WBGene00002985	-0.623307	0.000180587	0.00111896	Oogenic only
F17C11.10	WBGene00008921	-0.63618	0.000181079	0.00112126	Oogenic only
W09G12.9	WBGene00021123	0.891452	0.000182989	0.00113083	Oogenic only
klp-10	WBGene00002221	-1.14632	0.000189649	0.00116965	Oogenic only
C38D4.7	WBGene00008007	1.65191	0.000189818	0.00116991	Spermatogenic only
tbh-1	WBGene00006541	-0.868456	0.00019289	0.00118649	Oogenic and Spermatogenic
tni-1	WBGene00006584	1.3192	0.000193617	0.00119017	Oogenic and Spermatogenic
sup-26	WBGene00006331	-0.775997	0.000200454	0.00123138	Oogenic and Spermatogenic
W05H9.2	WBGene00021049	-1.57134	0.000204178	0.0012526	Oogenic only
tag-173	WBGene00006518	0.703325	0.000204139	0.0012526	Oogenic and Spermatogenic
tag-296	WBGene00018632	0.658531	0.000205434	0.00125864	Oogenic and Spermatogenic
Y24D9B.1	WBGene00021287	4.13754	0.000211176	0.00129211	Oogenic and Spermatogenic
lin-33	WBGene00003019	1.76628	0.000213794	0.00130641	Spermatogenic only
F35C11.5	WBGene00009404	-0.617036	0.000214321	0.00130877	Oogenic only
col-139	WBGene00000712	0.763095	0.000215624	0.00131586	Spermatogenic only
ZK863.4	WBGene00014124	-0.757341	0.000216929	0.00132296	Oogenic only
mec-8	WBGene00003172	-1.30843	0.000219571	0.00133731	Oogenic only
trpp-11	WBGene00015173	0.789548	0.000221254	0.00134667	Oogenic only
sams-4	WBGene00015540	0.845231	0.000234082	0.0014201	Oogenic and Spermatogenic
ran-1	WBGene00004302	-0.579552	0.000236426	0.00143338	Oogenic and Spermatogenic
R03D7.4	WBGene00010990	0.789954	0.000237295	0.00143771	Oogenic only
flcn-1	WBGene00017699	0.613973	0.000238106	0.00144168	Oogenic only
sax-1	WBGene00004727	-1.45994	0.000239174	0.00144721	Oogenic only
H24G06.1	WBGene00019237	0.986405	0.00024791	0.00149811	Oogenic and Spermatogenic
M176.4	WBGene00010943	1.1007	0.000255238	0.00154039	Oogenic and Spermatogenic
F54D10.5	WBGene00018806	-0.861041	0.000259782	0.00156578	Oogenic only
F20D6.11	WBGene00017640	1.45391	0.000273817	0.00164609	Oogenic and Spermatogenic
C07D8.6	WBGene00015565	-0.900011	0.000274006	0.00164617	Oogenic only
osm-11	WBGene00003891	-0.755804	0.000274294	0.00164683	Spermatogenic only
lec-3	WBGene00002266	0.887745	0.000279657	0.00167577	Oogenic and Spermatogenic
bli-4	WBGene00000254	0.573013	0.000288323	0.00172659	Oogenic only
scav-2	WBGene00013578	-0.563614	0.000290426	0.00173806	Oogenic only
apx-1	WBGene00000168	-0.589636	0.000295713	0.00176742	Oogenic only
Y82E9BR.3	WBGene00022336	-0.738481	0.000298224	0.00178129	Oogenic and Spermatogenic
gst-7	WBGene00001755	-1.34229	0.000299613	0.00178748	Oogenic and Spermatogenic
bir-1	WBGene00000249	0.797278	0.000312708	0.0018618	Oogenic and Spermatogenic
larp-5	WBGene00004147	0.552838	0.000314153	0.00186921	Oogenic only
glrx-22	WBGene00044608	0.840016	0.000321713	0.00191297	Oogenic and Spermatogenic
F53F1.4	WBGene00009982	0.885773	0.000325635	0.00193505	Oogenic only
rgs-7	WBGene00004350	-1.40428	0.000329181	0.00195362	Oogenic only
flt-1	WBGene00001470	-1.41526	0.000331342	0.00196441	Oogenic only
sqv-4	WBGene00005022	-1.0282	0.000339164	0.00200645	Oogenic only
C34D4.4	WBGene00016400	0.741124	0.000340507	0.00201311	Oogenic only
gly-20	WBGene00001645	0.774734	0.000341874	0.0020199	Oogenic and Spermatogenic
col-159	WBGene00000732	0.802311	0.000343638	0.00202852	Spermatogenic only
scl-2	WBGene00009895	-1.70325	0.000344	0.00202852	Spermatogenic only
chk-2	WBGene00000499	0.733569	0.000343814	0.00202852	Oogenic only
uba-5	WBGene00020184	0.696749	0.000344206	0.00202852	Oogenic and Spermatogenic
tts-1	WBGene00006650	-0.758938	0.000348993	0.00205543	Oogenic and Spermatogenic
cogc-5	WBGene00016608	0.728651	0.00035421	0.00208388	Oogenic and Spermatogenic
T09B4.8	WBGene00020382	1.0459	0.000354273	0.00208388	Oogenic and Spermatogenic
sec-3	WBGene00018703	-1.40349	0.000358989	0.00210895	Oogenic only
R04E5.8	WBGene00019871	-0.916623	0.000368556	0.00216241	Oogenic only
tfg-1	WBGene00006565	0.595598	0.000370713	0.0021737	Oogenic only
col-71	WBGene00000647	1.89395	0.000372466	0.00218259	Oogenic and Spermatogenic
tat-4	WBGene00020784	-0.986583	0.000373093	0.00218393	Oogenic only
pek-1	WBGene00003970	-1.26634	0.000376169	0.00219874	Oogenic only
myo-3	WBGene00003515	0.63599	0.000381134	0.00222636	Oogenic and Spermatogenic
cpna-2	WBGene00015061	0.574836	0.000384608	0.00224524	Oogenic and Spermatogenic
Y106G6H.6	WBGene00013719	-1.17425	0.000385019	0.00224623	Oogenic only
npl-4.2	WBGene00019121	1.29514	0.000391128	0.00228043	Oogenic only
F17A9.4	WBGene00017536	1.57854	0.000391967	0.00228389	Oogenic and Spermatogenic
unc-85	WBGene00006817	-0.916035	0.000394044	0.00229455	Oogenic only
puf-10	WBGene00004246	-1.00533	0.000394474	0.0022951	Oogenic only
C30A5.3	WBGene00016238	0.68324	0.000394632	0.0022951	Oogenic and Spermatogenic
attf-2	WBGene00017317	-0.58658	0.00039671	0.00230574	Oogenic only
hda-4	WBGene00001837	-1.00787	0.00039904	0.00231783	Oogenic only
vps-11	WBGene00011067	-0.808354	0.000403534	0.002341	Oogenic only
F18H3.4	WBGene00008940	-1.6117	0.000406152	0.00235472	Oogenic only
mig-2	WBGene00003239	-1.11519	0.000407782	0.00236269	Oogenic only
ben-1	WBGene00000248	1.12843	0.00041532	0.00240038	Oogenic and Spermatogenic
mct-5	WBGene00020168	0.655159	0.000418573	0.00241617	Oogenic only
C36A4.5	WBGene00007966	-0.930201	0.000418527	0.00241617	Oogenic only
Y37E11B.3	WBGene00021376	-1.25913	0.000442448	0.00254449	Oogenic only
grd-3	WBGene00001692	-0.768964	0.000453195	0.00260468	Oogenic and Spermatogenic
cysl-2	WBGene00010759	1.32263	0.000455649	0.00261716	Oogenic only
F35H10.10	WBGene00018073	0.925255	0.000464323	0.00266369	Oogenic and Spermatogenic
pat-3	WBGene00003930	-0.561517	0.000465441	0.00266845	Oogenic only
T14D7.1	WBGene00011767	1.37749	0.000467685	0.00267966	Oogenic and Spermatogenic
C37C3.9	WBGene00016501	-0.735495	0.000482592	0.00275996	Oogenic and Spermatogenic
F15D4.5	WBGene00008862	1.41151	0.000483478	0.00276333	Spermatogenic only
rsp-6	WBGene00004703	-0.743085	0.000491734	0.00280706	Oogenic only
smd-1	WBGene00004875	-0.748169	0.000495171	0.0028232	Oogenic and Spermatogenic
ife-5	WBGene00002063	1.21913	0.000499124	0.00284225	Oogenic and Spermatogenic
drh-3	WBGene00008400	0.662972	0.00050103	0.00285135	Oogenic only
F29B9.11	WBGene00017925	0.627823	0.000502886	0.00285841	Oogenic and Spermatogenic
Y59A8B.21	WBGene00013353	0.880084	0.000509857	0.00289272	Oogenic only
jmjd-2	WBGene00012982	-0.745484	0.000511586	0.00290076	Oogenic only
oga-1	WBGene00020596	-1.32116	0.000515882	0.00292333	Oogenic only
hpo-34	WBGene00009259	0.645216	0.000525154	0.00297224	Oogenic and Spermatogenic
tag-209	WBGene00011072	-1.0512	0.000532293	0.00300898	Spermatogenic only
nape-2	WBGene00021370	1.57427	0.000536222	0.0030275	Oogenic and Spermatogenic
Y111B2A.12	WBGene00013735	-0.826654	0.00054201	0.00305646	Oogenic only
crn-1	WBGene00000794	-0.835093	0.000556801	0.00313226	Oogenic only
spd-2	WBGene00004953	0.621396	0.000579509	0.00325296	Oogenic and Spermatogenic
tra-2	WBGene00006605	-0.656194	0.000579659	0.00325296	Oogenic only
W06B4.1	WBGene00021056	-1.46594	0.000594345	0.00333336	Oogenic only
D1054.11	WBGene00008378	-0.67701	0.000600049	0.00336129	Oogenic only
rab-6.2	WBGene00004270	-1.03353	0.000617385	0.00345631	Oogenic only
C31E10.5	WBGene00007846	-1.07468	0.000637249	0.00356107	Oogenic only
lst-2	WBGene00003084	-1.08028	0.000638616	0.00356657	Oogenic only
Y32F6A.6	WBGene00044209	1.54481	0.000648655	0.00361828	Spermatogenic only
gls-1	WBGene00007975	-0.520162	0.000650615	0.00362703	Oogenic only
F11E6.7	WBGene00008710	-0.774882	0.000658455	0.00366568	Oogenic only
col-94	WBGene00000669	1.27465	0.000664882	0.00369768	Spermatogenic only
ret-1	WBGene00004336	-0.502951	0.00066795	0.00371252	Oogenic only
sek-3	WBGene00022613	-1.15282	0.000670754	0.00372588	Oogenic only
retr-1	WBGene00018416	-0.591876	0.00067244	0.00373078	Oogenic only
ceh-39	WBGene00000460	-1.48701	0.000676704	0.00375159	Oogenic only
R05H5.4	WBGene00011039	1.51534	0.000680863	0.00377075	Spermatogenic only
F38A1.8	WBGene00009521	0.6784	0.000684699	0.00378973	Oogenic and Spermatogenic
unc-52	WBGene00006787	0.567666	0.00069164	0.00382131	Spermatogenic only
ZK370.4	WBGene00022718	0.553131	0.000697598	0.00384964	Oogenic only
C04F12.1	WBGene00007297	-1.03546	0.000708855	0.00390481	Oogenic only
swt-3	WBGene00007384	1.20437	0.000718424	0.00395048	Spermatogenic only
F25B4.5	WBGene00017768	0.60676	0.000737167	0.00404635	Oogenic and Spermatogenic
M106.3	WBGene00010911	-0.646033	0.000751516	0.00412268	Oogenic only
T28H10.3	WBGene00012144	-1.041	0.0007673	0.00420182	Spermatogenic only
pat-2	WBGene00003929	0.773319	0.000768181	0.00420416	Oogenic and Spermatogenic
F58D5.5	WBGene00010244	0.861728	0.000773575	0.00423119	Oogenic only
atg-9	WBGene00020706	-0.828401	0.000788787	0.00430554	Oogenic only
plc-4	WBGene00004039	0.696896	0.000789024	0.00430554	Oogenic only
M01E11.3	WBGene00019712	0.74319	0.00078842	0.00430554	Oogenic only
elo-5	WBGene00001243	0.80167	0.000798483	0.00435204	Spermatogenic only
Y45G5AM.9	WBGene00021561	0.792963	0.000827049	0.0044998	Oogenic only
ags-3	WBGene00000092	-1.31957	0.000837374	0.00455331	Oogenic only
abt-2	WBGene00000020	1.3025	0.000849004	0.0046101	Spermatogenic only
C08F8.3	WBGene00007445	-0.778986	0.000849307	0.0046101	Oogenic and Spermatogenic
rpn-6.1	WBGene00004462	-0.537748	0.00086402	0.00468722	Oogenic only
atl-1	WBGene00000226	0.682592	0.000870635	0.00472035	Oogenic only
B0513.4	WBGene00007196	-1.0658	0.000885089	0.00479591	Oogenic and Spermatogenic
hse-5	WBGene00002003	-0.504361	0.000892906	0.00483544	Oogenic only
T01G9.2	WBGene00011344	-0.619999	0.000893987	0.00483848	Oogenic only
oma-1	WBGene00003864	-0.616827	0.000896226	0.00484777	Oogenic only
ifc-2	WBGene00002056	0.770535	0.000914459	0.00493776	Oogenic and Spermatogenic
inx-22	WBGene00002144	-0.600357	0.000931565	0.00502136	Oogenic only
ifb-2	WBGene00002054	1.1292	0.000934639	0.00503501	Oogenic and Spermatogenic
tag-253	WBGene00016500	-0.989187	0.0009413	0.00506795	Oogenic only
unc-40	WBGene00006776	-0.664536	0.00095496	0.00513256	Oogenic only
nck-1	WBGene00006410	-1.14304	0.000959533	0.00515416	Oogenic only
F53C11.4	WBGene00009974	-0.568164	0.000967998	0.00519662	Oogenic only
acs-17	WBGene00016716	-0.837572	0.000979025	0.00525278	Spermatogenic only
mua-3	WBGene00003482	0.731672	0.00100583	0.00539039	Spermatogenic only
T28B8.1	WBGene00012113	-0.877956	0.00103548	0.0055448	Oogenic and Spermatogenic
chin-1	WBGene00015267	-0.836233	0.00103614	0.0055448	Oogenic only
F11G11.5	WBGene00017385	0.521752	0.00105479	0.00563974	Oogenic and Spermatogenic
Y47G6A.26	WBGene00021650	3.5482	0.00106417	0.00568662	Spermatogenic only
tom-1	WBGene00006594	1.00472	0.00108487	0.00579389	Spermatogenic only
zim-2	WBGene00011600	0.627119	0.001091	0.0058199	Oogenic only
R148.4	WBGene00020103	0.664563	0.00109201	0.00582199	Oogenic and Spermatogenic
car-1	WBGene00012484	-0.732227	0.00111929	0.00595374	Oogenic only
aagr-4	WBGene00018682	1.11859	0.00112816	0.00599747	Oogenic only
hpo-3	WBGene00018006	-0.702555	0.00113227	0.00601589	Oogenic only
D1007.8	WBGene00017005	0.652371	0.00113938	0.00604633	Oogenic only
eri-7	WBGene00016566	-0.740093	0.00114209	0.00605417	Oogenic only
tag-53	WBGene00006432	-0.98068	0.00114888	0.00608669	Oogenic only
col-142	WBGene00000715	0.872488	0.00115412	0.00611099	Oogenic and Spermatogenic
riok-1	WBGene00019698	-0.742356	0.00116248	0.00615174	Oogenic only
ifb-1	WBGene00002053	0.603697	0.00116483	0.00616067	Oogenic and Spermatogenic
C10G11.7	WBGene00015687	-0.614384	0.00118128	0.00624411	Oogenic only
xpc-1	WBGene00022296	0.558465	0.00119337	0.00630441	Oogenic only
lab-1	WBGene00007278	0.808286	0.00120876	0.00638207	Oogenic and Spermatogenic
dnj-28	WBGene00001046	0.908549	0.00121112	0.00638727	Oogenic and Spermatogenic
din-1	WBGene00008549	-0.652773	0.00121398	0.00639508	Oogenic only
T12G3.2	WBGene00011738	-1.0578	0.00121533	0.00639857	Oogenic only
mcm-6	WBGene00003158	-0.645891	0.00122158	0.00642417	Oogenic only
dkf-2	WBGene00012019	-0.586788	0.00125976	0.00661372	Oogenic only
psr-1	WBGene00004205	0.63172	0.00126224	0.00662302	Oogenic and Spermatogenic
fat-6	WBGene00001398	0.611379	0.00126367	0.00662678	Oogenic only
Y54G2A.11	WBGene00021876	-0.891775	0.00127019	0.00665346	Oogenic and Spermatogenic
K09H9.2	WBGene00019595	-1.17582	0.00128193	0.00671116	Oogenic only
rab-7	WBGene00004271	-0.730368	0.0012877	0.00673758	Oogenic and Spermatogenic
E02D9.1	WBGene00017098	-0.671257	0.00129193	0.00675587	Oogenic only
Y59A8B.12	WBGene00013349	-0.735526	0.00129436	0.0067648	Oogenic only
ctns-1	WBGene00008052	-0.653189	0.0012989	0.00678467	Oogenic only
rbr-2	WBGene00004319	-0.48898	0.00133891	0.00697407	Oogenic only
C53C7.5	WBGene00014294	-0.655583	0.00137142	0.00712741	Spermatogenic only
glp-1	WBGene00001609	-0.638715	0.00143217	0.00741818	Oogenic only
C56C10.11	WBGene00016967	0.719297	0.00144526	0.00748183	Oogenic and Spermatogenic
cyp-31A2	WBGene00010354	-0.958503	0.00144909	0.00749331	Oogenic and Spermatogenic
T05E11.9	WBGene00014505	-0.939986	0.00145101	0.00749905	Oogenic and Spermatogenic
cdt-1	WBGene00000413	-0.661131	0.00146701	0.00757752	Oogenic only
spat-2	WBGene00012973	-0.582493	0.00146905	0.00758385	Oogenic only
gpr-2	WBGene00001689	0.845584	0.00148993	0.00768734	Oogenic and Spermatogenic
mop-25.1	WBGene00019827	-0.600119	0.00151508	0.00781278	Oogenic only
F48F7.6	WBGene00009851	-1.17917	0.00152428	0.00785582	Oogenic only
trt-1	WBGene00006618	-0.983159	0.00153966	0.00793069	Oogenic only
C44C10.9	WBGene00008089	1.08747	0.00154834	0.00796215	Spermatogenic only
Y41E3.7	WBGene00012765	0.700901	0.00157162	0.00806848	Oogenic only
T19H12.2	WBGene00020588	-0.495456	0.00158385	0.00812674	Oogenic and Spermatogenic
R02F2.4	WBGene00019833	-0.759709	0.00158534	0.00812991	Oogenic and Spermatogenic
lin-49	WBGene00003034	0.554759	0.00164506	0.00842218	Oogenic only
C45B2.1	WBGene00016658	0.740688	0.00164941	0.0084398	Spermatogenic only
inx-14	WBGene00002136	-0.715946	0.00165544	0.00846602	Oogenic only
pmk-1	WBGene00004055	-1.10819	0.00167488	0.00855597	Oogenic only
dpf-5	WBGene00001058	-0.704403	0.00169474	0.00865269	Oogenic and Spermatogenic
T07C4.10	WBGene00011562	0.553349	0.00170134	0.00868162	Oogenic only
R05D3.2	WBGene00019877	0.644721	0.00172575	0.00879836	Oogenic only
Y94H6A.16	WBGene00235346	0.626414	0.00172612	0.00879836	Oogenic and Spermatogenic
ldb-1	WBGene00002261	-1.06638	0.00174562	0.00889288	Oogenic only
his-59	WBGene00001933	-0.825765	0.00175652	0.00893862	Oogenic only
cpar-1	WBGene00010036	-0.902896	0.00177929	0.00904454	Oogenic and Spermatogenic
K04B12.2	WBGene00010550	-0.94299	0.00179338	0.00911117	Oogenic only
pqe-1	WBGene00004095	0.521041	0.00180105	0.00913017	Oogenic only
Y17G7B.13	WBGene00012466	0.683686	0.00180053	0.00913017	Oogenic only
ppw-1	WBGene00004093	0.751166	0.00181634	0.00920265	Oogenic only
grk-1	WBGene00001708	-0.940526	0.00183587	0.00929149	Oogenic only
F34H10.3	WBGene00009380	-1.23006	0.001841	0.00931236	Oogenic only
swt-4	WBGene00012647	1.16958	0.00187684	0.00948333	Oogenic and Spermatogenic
bet-2	WBGene00010199	-1.00851	0.00189874	0.00958875	Oogenic only
W07E11.1	WBGene00012326	-0.670656	0.0019406	0.00978418	Oogenic only
bre-3	WBGene00000268	0.581885	0.00195474	0.0098501	Oogenic and Spermatogenic
tag-321	WBGene00044325	-0.689376	0.00195622	0.00985224	Oogenic only
F14E5.2	WBGene00008800	0.503835	0.00200523	0.0100785	Oogenic only
sdn-1	WBGene00004749	-0.886043	0.00200549	0.0100785	Oogenic only
pig-1	WBGene00021012	-0.544074	0.00203281	0.0102047	Oogenic only
C25A1.5	WBGene00007707	-0.647639	0.00203657	0.0102181	Oogenic only
wago-4	WBGene00010263	-1.28345	0.00203881	0.0102238	Oogenic only
MTCE.7	WBGene00014454	-0.641481	0.00204074	0.010228	Oogenic and Spermatogenic
cdc-14	WBGene00000383	-0.550062	0.00204196	0.0102285	Oogenic only
metr-1	WBGene00010988	0.590924	0.0020531	0.0102788	Oogenic and Spermatogenic
C42C1.8	WBGene00016586	-0.814638	0.00206305	0.0103175	Oogenic only
ZC504.3	WBGene00013917	-1.26841	0.00206208	0.0103175	Oogenic only
acdh-12	WBGene00017125	0.557782	0.00208652	0.0104293	Oogenic and Spermatogenic
C01F1.6	WBGene00015301	-0.490057	0.00215769	0.0107653	Oogenic only
Y62H9A.5	WBGene00013393	-0.709162	0.00215658	0.0107653	Oogenic and Spermatogenic
hacd-1	WBGene00019978	0.925217	0.0021584	0.0107653	Oogenic and Spermatogenic
F07H5.5	WBGene00014309	-0.579763	0.00219023	0.0109006	Oogenic only
Y39G10AR.9	WBGene00021467	-0.810596	0.00219427	0.0109149	Oogenic only
ced-6	WBGene00000420	-0.590586	0.00220826	0.0109786	Oogenic only
C30G12.6	WBGene00016277	0.456235	0.0022184	0.0110231	Oogenic only
mpk-1	WBGene00003401	-0.4466	0.00222094	0.0110298	Oogenic only
C31H5.4	WBGene00007855	-1.23294	0.0022327	0.0110823	Oogenic only
Y25C1A.13	WBGene00021296	1.00894	0.0022392	0.0111087	Oogenic and Spermatogenic
emo-1	WBGene00001303	0.584328	0.00224843	0.0111425	Oogenic and Spermatogenic
F54C8.7	WBGene00010040	0.655025	0.00225289	0.0111586	Oogenic and Spermatogenic
sli-1	WBGene00004829	-1.04672	0.00229583	0.0113531	Oogenic only
coh-1	WBGene00000591	-1.20942	0.00231467	0.0114403	Oogenic only
F56A11.5	WBGene00018925	-1.19597	0.00232653	0.0114927	Oogenic only
eat-20	WBGene00001148	-1.13399	0.00233068	0.0115071	Oogenic only
nhr-86	WBGene00003676	0.626385	0.00233545	0.0115184	Oogenic only
Y46G5A.18	WBGene00012908	-0.83232	0.00237074	0.0116677	Oogenic only
F26F4.5	WBGene00017827	0.521016	0.00237587	0.0116867	Oogenic and Spermatogenic
T28C6.7	WBGene00012121	0.65683	0.00240785	0.0118378	Spermatogenic only
mml-1	WBGene00003378	-1.01163	0.00242755	0.011922	Oogenic only
F20D12.2	WBGene00017642	0.559134	0.0024268	0.011922	Oogenic only
hpo-4	WBGene00011482	0.508968	0.00246501	0.0120868	Oogenic only
akt-1	WBGene00000102	0.501758	0.00255035	0.0124691	Oogenic only
K04F10.3	WBGene00019396	0.487345	0.00257526	0.0125808	Oogenic and Spermatogenic
tth-1	WBGene00006649	-1.12822	0.00258507	0.0126221	Oogenic only
atn-1	WBGene00000228	0.536989	0.00259338	0.012656	Spermatogenic only
pyr-1	WBGene00004259	-0.62006	0.00264101	0.0128817	Oogenic only
D1005.1	WBGene00016995	-0.801221	0.00267384	0.0130349	Oogenic only
Y106G6H.5	WBGene00013718	0.639547	0.00270078	0.0131594	Oogenic only
mel-26	WBGene00003209	-0.499205	0.00277987	0.0135235	Oogenic only
hrpf-1	WBGene00020936	-0.820312	0.00278158	0.0135247	Oogenic only
snr-2	WBGene00004915	-0.635	0.00279396	0.0135707	Oogenic only
F39C12.1	WBGene00018193	-0.735372	0.00287788	0.0139491	Oogenic only
gsy-1	WBGene00001793	-0.497681	0.00287998	0.013952	Oogenic only
T28F4.1	WBGene00012136	-0.912537	0.0028922	0.0140038	Oogenic only
F13H10.8	WBGene00044784	0.485837	0.00291991	0.0141306	Oogenic and Spermatogenic
lec-10	WBGene00002273	0.874393	0.00292334	0.0141399	Spermatogenic only
dnj-4	WBGene00001022	0.902224	0.00293177	0.0141733	Oogenic only
rrn-3.1	WBGene00004622	-1.2211	0.00293368	0.0141751	Oogenic and Spermatogenic
F28F8.5	WBGene00009223	-1.00179	0.00296218	0.014298	Oogenic only
F31C3.4	WBGene00009286	0.536391	0.00296653	0.0143115	Oogenic only
F17H10.1	WBGene00008925	-0.989227	0.00300138	0.0144721	Oogenic and Spermatogenic
panl-2	WBGene00017951	0.427252	0.00300295	0.0144722	Oogenic only
ZK6.11	WBGene00022645	0.641556	0.00304138	0.0146346	Oogenic and Spermatogenic
clp-2	WBGene00000543	0.648909	0.00304915	0.0146644	Oogenic only
mans-2	WBGene00008258	1.06393	0.00305625	0.0146909	Spermatogenic only
Y62H9A.6	WBGene00013394	-0.709157	0.00306213	0.0147115	Oogenic and Spermatogenic
F43G9.13	WBGene00009673	0.687281	0.00311361	0.0149511	Oogenic only
hpo-16	WBGene00019725	0.768538	0.00312088	0.0149783	Oogenic only
Y105E8A.8	WBGene00013669	-0.783445	0.00313262	0.0150191	Oogenic and Spermatogenic
plk-3	WBGene00004044	-0.418583	0.00314135	0.0150454	Oogenic only
C29H12.2	WBGene00016235	-0.491737	0.0031484	0.0150714	Oogenic only
F58D5.11	WBGene00219983	0.738119	0.00316052	0.0151216	Oogenic and Spermatogenic
C50C3.1	WBGene00016799	0.764591	0.00318519	0.0152318	Oogenic only
cas-2	WBGene00015975	0.742944	0.00319404	0.0152662	Oogenic and Spermatogenic
gbf-1	WBGene00007703	0.515859	0.00319775	0.0152717	Oogenic and Spermatogenic
spat-3	WBGene00020496	-0.877788	0.00319847	0.0152717	Oogenic only
gfi-2	WBGene00001582	-0.528954	0.00320458	0.015293	Oogenic only
mics-1	WBGene00011890	0.545875	0.00321151	0.0153182	Oogenic only
col-160	WBGene00000733	0.503559	0.00329199	0.0156699	Spermatogenic only
fcp-1	WBGene00009479	0.476453	0.00329368	0.0156699	Oogenic only
ZK742.2	WBGene00022812	0.85982	0.00335734	0.0159564	Oogenic only
ZC434.9	WBGene00013895	0.954209	0.00335635	0.0159564	Spermatogenic only
C24F3.2	WBGene00007697	0.792189	0.00336316	0.0159759	Oogenic and Spermatogenic
F13B12.6	WBGene00008733	-0.666008	0.00336685	0.0159852	Oogenic only
tyr-2	WBGene00010661	1.21913	0.00339274	0.0160999	Spermatogenic only
fbxa-107	WBGene00012564	1.04198	0.00341196	0.0161809	Oogenic only
dna-2	WBGene00001016	0.533685	0.00345822	0.0163604	Oogenic only
hum-1	WBGene00002035	-0.60238	0.00360368	0.0170226	Oogenic only
ZK1128.4	WBGene00014230	-0.822873	0.00363446	0.0171505	Oogenic only
Y43E12A.3	WBGene00012795	0.695643	0.00365066	0.0172182	Oogenic only
rrn-3.56	WBGene00004677	-1.21932	0.00366151	0.0172539	Oogenic and Spermatogenic
F22H10.10	WBGene00219912	1.13152	0.00366194	0.0172539	Spermatogenic only
twk-18	WBGene00006672	0.838039	0.00367139	0.0172809	Spermatogenic only
ubxn-4	WBGene00022703	0.60656	0.00367412	0.017285	Oogenic and Spermatogenic
sec-16	WBGene00013985	0.570443	0.00371015	0.0174368	Oogenic only
daf-4	WBGene00000900	-0.883145	0.00372555	0.0175003	Oogenic only
eri-6	WBGene00016561	-0.741709	0.00373203	0.017513	Oogenic and Spermatogenic
ced-1	WBGene00000415	-0.530102	0.0037377	0.0175307	Oogenic and Spermatogenic
vab-1	WBGene00006868	-0.591844	0.00375361	0.0175965	Oogenic only
Y41E3.11	WBGene00012769	-0.5495	0.00379231	0.017751	Oogenic only
mca-1	WBGene00003151	-0.523862	0.0038044	0.0177896	Oogenic only
F56C9.10	WBGene00018953	-0.420387	0.00382349	0.017862	Oogenic only
ntp-1	WBGene00016380	0.666942	0.00382372	0.017862	Oogenic and Spermatogenic
ZK858.10	WBGene00220246	-1.1363	0.00384439	0.0179495	Oogenic and Spermatogenic
stc-1	WBGene00006059	0.566027	0.0038715	0.018067	Oogenic and Spermatogenic
mbd-2	WBGene00023409	-1.10904	0.00390264	0.018194	Oogenic only
mthf-1	WBGene00015512	0.488498	0.00393597	0.0183402	Oogenic only
memb-2	WBGene00019757	1.03633	0.00401188	0.0186564	Oogenic and Spermatogenic
inx-8	WBGene00002130	0.695394	0.0040277	0.0187206	Oogenic and Spermatogenic
hil-4	WBGene00001855	-0.478195	0.0040782	0.0189459	Oogenic and Spermatogenic
tps-2	WBGene00006603	0.828644	0.00408096	0.0189492	Spermatogenic only
F13E6.1	WBGene00008745	-0.845518	0.00408338	0.018951	Oogenic only
M01H9.3	WBGene00019719	-0.436272	0.00410445	0.0190297	Oogenic and Spermatogenic
T10C6.6	WBGene00011688	-0.581985	0.00412603	0.0191202	Oogenic only
ZC443.3	WBGene00013898	-1.17892	0.00413992	0.019175	Oogenic and Spermatogenic
snap-29	WBGene00019305	0.632247	0.00416905	0.0192715	Oogenic and Spermatogenic
lron-10	WBGene00012646	-0.825385	0.00416894	0.0192715	Oogenic only
fzy-1	WBGene00001511	-0.52359	0.00417953	0.0193103	Oogenic and Spermatogenic
klp-12	WBGene00002223	0.520248	0.00418654	0.019333	Oogenic only
asb-2	WBGene00000207	0.508706	0.00419572	0.0193658	Oogenic and Spermatogenic
unc-68	WBGene00006801	0.532036	0.00422201	0.0194775	Oogenic and Spermatogenic
iff-2	WBGene00002065	0.572953	0.0042628	0.0196461	Oogenic and Spermatogenic
ath-1	WBGene00010564	0.514036	0.00428847	0.0197546	Oogenic only
ttn-1	WBGene00006436	0.470803	0.00431846	0.0198829	Oogenic and Spermatogenic
acly-2	WBGene00007150	-0.564805	0.00433482	0.0199483	Oogenic only
unc-82	WBGene00006814	0.902865	0.00437753	0.0201349	Oogenic and Spermatogenic
hcp-1	WBGene00001829	-0.45838	0.00439789	0.0202185	Oogenic and Spermatogenic
itr-1	WBGene00002173	0.644244	0.00440916	0.0202603	Spermatogenic only
hsf-1	WBGene00002004	-0.569793	0.00442657	0.0203303	Oogenic only
T13F3.6	WBGene00011753	-0.816318	0.00445821	0.0204553	Spermatogenic only
cap-1	WBGene00000292	-0.546221	0.00450962	0.020681	Oogenic and Spermatogenic
F46H5.2	WBGene00018518	-1.10434	0.00462689	0.0211978	Oogenic only
apa-2	WBGene00000161	-0.740425	0.00468043	0.0214325	Oogenic only
ogdh-1	WBGene00020679	0.456603	0.00471489	0.0215797	Oogenic and Spermatogenic
cyn-10	WBGene00000886	-1.07472	0.00472242	0.0216035	Oogenic and Spermatogenic
C34B2.10	WBGene00016395	0.580539	0.00476017	0.0217655	Oogenic only
F59A6.5	WBGene00019087	-0.551238	0.00476423	0.0217733	Oogenic only
T22C1.6	WBGene00011917	-0.615879	0.00477081	0.0217926	Oogenic only
zfp-3	WBGene00021047	-1.09	0.0047914	0.0218652	Oogenic only
F26A1.13	WBGene00017811	0.99887	0.0048685	0.0222061	Oogenic only
F58D5.13	WBGene00219985	0.86862	0.0049364	0.0224937	Oogenic and Spermatogenic
atx-3	WBGene00006446	0.606044	0.00494851	0.0225378	Oogenic only
vha-7	WBGene00006916	-0.556322	0.0049534	0.022549	Oogenic only
Y16B4A.2	WBGene00012445	0.683344	0.00497327	0.0226173	Oogenic and Spermatogenic
unc-89	WBGene00006820	0.435262	0.00499924	0.0227243	Oogenic and Spermatogenic
C30F12.4	WBGene00016263	-0.598143	0.0050517	0.0229515	Oogenic only
piki-1	WBGene00009552	-0.943632	0.00519276	0.0235808	Oogenic only
nmy-1	WBGene00003776	0.529977	0.00525709	0.0238613	Oogenic only
epi-1	WBGene00001328	0.490803	0.00526319	0.0238773	Oogenic and Spermatogenic
deb-1	WBGene00000942	0.546692	0.00535092	0.0242398	Oogenic and Spermatogenic
nstp-1	WBGene00008275	0.892406	0.00536438	0.024277	Oogenic only
acdh-7	WBGene00020812	-0.959222	0.00540348	0.0244421	Oogenic only
mdt-8	WBGene00007013	-1.01574	0.00541872	0.024499	Oogenic only
F44A2.5	WBGene00018405	1.05782	0.00544389	0.0246008	Spermatogenic only
trpp-8	WBGene00018512	0.493272	0.00546323	0.0246763	Oogenic only
sqd-1	WBGene00022235	-0.434554	0.00546795	0.0246856	Oogenic only
ZC155.4	WBGene00022532	-0.77741	0.00551453	0.0248837	Oogenic and Spermatogenic
F35G12.11	WBGene00009444	-0.724855	0.00552879	0.024936	Oogenic only
T04F8.2	WBGene00011441	-0.992257	0.00553961	0.0249726	Oogenic only
F21D5.5	WBGene00009010	-0.709734	0.00564907	0.0254537	Oogenic only
C31H1.8	WBGene00016291	-0.527414	0.00565231	0.025456	Oogenic only
F35A5.1	WBGene00018024	0.674193	0.00568005	0.0255685	Spermatogenic only
par-3	WBGene00003918	-0.501435	0.00576659	0.0259329	Oogenic only
hke-4.2	WBGene00006494	-0.600161	0.00580552	0.0260827	Oogenic only
ima-3	WBGene00002074	-0.62494	0.00581365	0.0261066	Oogenic only
szy-4	WBGene00077732	-0.491772	0.00582334	0.0261374	Oogenic only
let-19	WBGene00002295	-0.684339	0.0059518	0.0266882	Oogenic only
fat-2	WBGene00001394	0.512065	0.00608834	0.0272741	Oogenic and Spermatogenic
tsp-12	WBGene00006638	-0.653977	0.00612545	0.0274139	Oogenic only
Y39G10AR.11	WBGene00021469	-0.810173	0.00615402	0.0275285	Oogenic and Spermatogenic
pod-2	WBGene00004076	0.420471	0.00619277	0.0276885	Oogenic only
F54D7.2	WBGene00018797	-0.535454	0.00621089	0.0277562	Oogenic and Spermatogenic
atg-18	WBGene00018294	-0.424895	0.00625965	0.0279486	Oogenic and Spermatogenic
ebax-1	WBGene00004140	-0.877036	0.00625998	0.0279486	Oogenic only
C01H6.6	WBGene00007255	1.01563	0.00629563	0.0280808	Oogenic and Spermatogenic
mlk-1	WBGene00003374	1.16364	0.00637352	0.0284145	Oogenic and Spermatogenic
cTel55X.1	WBGene00007068	-1.10244	0.00638612	0.028457	Oogenic only
syp-3	WBGene00006377	0.484055	0.00643222	0.0286487	Oogenic only
F21C10.7	WBGene00017657	0.646536	0.0064681	0.0287671	Oogenic and Spermatogenic
C36A4.4	WBGene00007965	-0.555893	0.00646605	0.0287671	Oogenic and Spermatogenic
ccpp-1	WBGene00018995	0.631647	0.00655604	0.0291312	Oogenic only
F59G1.8	WBGene00019129	0.771821	0.00659038	0.029251	Oogenic only
lec-9	WBGene00002272	0.761775	0.00659267	0.029251	Oogenic and Spermatogenic
T16G12.1	WBGene00011803	0.955124	0.00668505	0.0296467	Oogenic and Spermatogenic
C06A5.8	WBGene00015505	-0.792444	0.00671545	0.0297673	Oogenic only
dgtr-1	WBGene00020910	-0.729915	0.00672691	0.0297897	Oogenic only
C41G7.3	WBGene00008061	-0.539994	0.00672655	0.0297897	Oogenic only
dig-1	WBGene00000998	-0.435235	0.00677835	0.0299889	Spermatogenic only
tac-1	WBGene00006381	-0.478664	0.00678791	0.0300169	Oogenic only
F47B7.2	WBGene00018533	-0.945001	0.0068378	0.0302231	Oogenic only
itsn-1	WBGene00006405	-0.458945	0.00685208	0.0302593	Oogenic only
C11D2.4	WBGene00015702	-0.53213	0.00685252	0.0302593	Oogenic only
npp-11	WBGene00003797	-0.62648	0.00688887	0.0304054	Oogenic only
cpg-8	WBGene00019357	-0.631684	0.00692508	0.0305361	Oogenic only
vnut-1	WBGene00010758	0.465658	0.00694664	0.0306167	Oogenic only
tag-123	WBGene00006472	-0.65627	0.00697411	0.0307232	Oogenic only
lmd-3	WBGene00018700	0.471628	0.0069977	0.0308125	Oogenic and Spermatogenic
Y44E3A.6	WBGene00021551	-0.615481	0.00708133	0.0311659	Oogenic only
Y17G7B.20	WBGene00012471	-0.443424	0.00708952	0.0311872	Oogenic only
fib-1	WBGene00001423	-0.448391	0.00728547	0.0320037	Oogenic and Spermatogenic
C14B1.7	WBGene00007578	0.443756	0.00729824	0.0320446	Oogenic only
F07H5.10	WBGene00008561	0.70302	0.00734372	0.032229	Oogenic only
F48A11.4	WBGene00018585	-0.524658	0.00737046	0.0323311	Oogenic only
C16A3.10	WBGene00015814	0.506804	0.0073795	0.0323555	Oogenic and Spermatogenic
mdl-1	WBGene00003163	0.795831	0.0073896	0.0323692	Spermatogenic only
dpy-11	WBGene00001073	0.487094	0.00745299	0.0326314	Oogenic and Spermatogenic
ung-1	WBGene00013241	-0.997645	0.0075034	0.0328367	Oogenic only
Y62F5A.12	WBGene00077453	-0.823891	0.00755688	0.0330551	Oogenic only
Y38F1A.6	WBGene00012608	0.515562	0.00767963	0.0335446	Oogenic and Spermatogenic
ZK185.1	WBGene00022681	-0.80644	0.00768619	0.0335575	Oogenic only
rer-1	WBGene00009783	0.532785	0.00769677	0.0335879	Oogenic only
F52H3.4	WBGene00009946	0.559548	0.00774122	0.0337501	Oogenic only
K08F4.3	WBGene00010678	0.639204	0.00774681	0.0337586	Oogenic and Spermatogenic
pup-2	WBGene00019628	-0.425067	0.00775602	0.0337671	Oogenic only
aakg-5	WBGene00011276	0.476672	0.00777448	0.0338316	Oogenic only
prg-1	WBGene00004178	0.450927	0.00782849	0.0340347	Oogenic only
hcp-4	WBGene00001832	0.520266	0.0078904	0.0342878	Oogenic and Spermatogenic
R02D3.7	WBGene00019824	-0.857984	0.00792055	0.0344027	Oogenic only
K02C4.3	WBGene00010502	-0.559674	0.00794218	0.0344805	Oogenic only
bath-29	WBGene00017452	0.805565	0.00798272	0.0346403	Oogenic only
F44E7.4	WBGene00018426	0.432559	0.00803877	0.0348672	Oogenic only
F10C2.4	WBGene00008645	0.476347	0.00805944	0.0349405	Oogenic only
ZK1321.4	WBGene00014262	0.619369	0.00806645	0.0349546	Oogenic and Spermatogenic
rpa-2	WBGene00019767	0.453536	0.00809361	0.0350559	Oogenic and Spermatogenic
F19C6.2	WBGene00008951	-0.985142	0.008139	0.0352361	Oogenic only
rpl-25.1	WBGene00004438	0.72421	0.00815964	0.035309	Oogenic and Spermatogenic
Y54G11A.3	WBGene00013214	0.553534	0.00817495	0.0353587	Oogenic and Spermatogenic
mup-4	WBGene00003497	0.493799	0.00822085	0.0355407	Oogenic and Spermatogenic
ppfr-1	WBGene00008878	0.397699	0.0082611	0.0356981	Oogenic only
anr-35	WBGene00219589	-1.05249	0.00831605	0.0358854	Oogenic and Spermatogenic
chd-3	WBGene00000482	-0.853773	0.00837243	0.0361119	Oogenic only
syp-2	WBGene00006376	0.501813	0.00840304	0.0362271	Oogenic and Spermatogenic
F53H2.3	WBGene00010006	-0.5888	0.00844612	0.0363959	Oogenic only
F32A7.5	WBGene00009306	0.635352	0.00853008	0.0367407	Oogenic only
cec-4	WBGene00017990	-0.780537	0.0086353	0.0371594	Oogenic only
F53H1.4	WBGene00018778	-0.525287	0.00864624	0.0371893	Oogenic only
C06A1.12	WBGene00219803	-0.48908	0.00870421	0.0373866	Oogenic and Spermatogenic
fut-3	WBGene00006402	-0.881477	0.00877968	0.0376627	Oogenic only
snpc-3.1	WBGene00015098	0.686035	0.00878066	0.0376627	Oogenic only
rrf-3	WBGene00004510	0.460293	0.00878498	0.0376638	Oogenic only
T10B10.3	WBGene00011680	-0.787221	0.00880502	0.0377323	Oogenic only
dnc-6	WBGene00021827	-0.994536	0.00885367	0.0379058	Oogenic only
MTCE.33	WBGene00014472	-1.1574	0.0090092	0.0384652	Oogenic and Spermatogenic
K02B7.3	WBGene00010491	1.07202	0.00900566	0.0384652	Oogenic and Spermatogenic
grd-5	WBGene00001694	-1.09039	0.00902589	0.0385188	Spermatogenic only
W05F2.4	WBGene00021036	0.682885	0.00907396	0.0387061	Spermatogenic only
F56C11.5	WBGene00018957	-0.803066	0.00916575	0.0390618	Oogenic only
hpo-29	WBGene00021754	0.545547	0.00917804	0.0390962	Oogenic and Spermatogenic
F56F11.4	WBGene00018991	-0.900542	0.00919164	0.0391362	Oogenic only
hpo-5	WBGene00011776	0.609849	0.0092169	0.0392257	Oogenic only
mex-5	WBGene00003230	-0.369416	0.00924132	0.0393116	Oogenic only
prmt-5	WBGene00016408	0.513851	0.00924938	0.0393279	Oogenic only
C28A5.1	WBGene00007788	0.705665	0.0092569	0.0393418	Oogenic only
bath-42	WBGene00016803	0.465134	0.00927025	0.0393625	Oogenic only
Y37E11AL.2	WBGene00021358	3.45676	0.00926982	0.0393625	Spermatogenic only
kin-4	WBGene00002192	-0.49748	0.00936435	0.0397439	Oogenic only
Y62H9A.4	WBGene00013392	-0.871926	0.00942797	0.0399956	Oogenic and Spermatogenic
hmp-1	WBGene00001978	-0.433517	0.00948596	0.0401865	Oogenic only
elo-6	WBGene00001244	0.505346	0.00954039	0.0403676	Oogenic and Spermatogenic
vps-33.1	WBGene00015130	-0.590739	0.00957367	0.0404842	Oogenic only
hpr-17	WBGene00001998	-1.05206	0.00960484	0.0405975	Oogenic only
hpo-27	WBGene00016418	-0.477656	0.00966915	0.0408136	Oogenic only
T28F4.5	WBGene00012140	-0.558214	0.00969696	0.0409124	Spermatogenic only
D2030.2	WBGene00008412	-0.546152	0.00975154	0.0411239	Oogenic only
pmr-1	WBGene00004063	0.503206	0.00977778	0.0411972	Oogenic only
scc-3	WBGene00004738	0.396528	0.00982532	0.0413787	Oogenic only
F54D5.9	WBGene00010053	0.532399	0.00983885	0.0414169	Oogenic only
cgef-1	WBGene00006496	-0.856021	0.00987685	0.0415203	Oogenic only
T28D9.4	WBGene00020896	-0.410594	0.0098733	0.0415203	Oogenic only
bath-41	WBGene00018137	-0.627988	0.0100824	0.0423079	Oogenic only
C01H6.9	WBGene00007258	0.665339	0.0101209	0.04245	Oogenic only
pqn-52	WBGene00019713	0.427517	0.0101781	0.042671	Oogenic only
Y45G12B.2	WBGene00021563	0.473786	0.0102151	0.0428065	Oogenic only
wago-1	WBGene00011061	-0.434319	0.0102364	0.0428377	Oogenic only
R11H6.2	WBGene00011250	-0.600517	0.0103728	0.0433892	Oogenic and Spermatogenic
ugt-46	WBGene00015141	0.961632	0.0105742	0.0441121	Oogenic only
Y32F6B.1	WBGene00012531	1.09861	0.0105731	0.0441121	Oogenic and Spermatogenic
W09G3.6	WBGene00012369	-0.552553	0.0105697	0.0441121	Oogenic only
gly-3	WBGene00001628	0.550992	0.010662	0.0444584	Oogenic and Spermatogenic
zip-1	WBGene00006986	0.858919	0.0106868	0.0445218	Oogenic and Spermatogenic
B0238.9	WBGene00015073	0.453537	0.0107804	0.0448918	Oogenic only
Y39B6A.13	WBGene00012675	-0.999014	0.0108618	0.0451698	Oogenic only
gon-14	WBGene00002148	-0.452317	0.0109021	0.0452967	Oogenic only
K04G7.1	WBGene00019400	-0.814125	0.0109006	0.0452967	Oogenic only
T05A12.4	WBGene00020235	-0.868786	0.0109186	0.045345	Oogenic only
spr-5	WBGene00005010	-0.605474	0.0109754	0.0455606	Oogenic only
mtm-9	WBGene00003479	-0.712514	0.0110142	0.0457014	Oogenic only
snb-1	WBGene00004897	-0.388135	0.0110803	0.0459548	Oogenic and Spermatogenic
hgrs-1	WBGene00004101	0.549865	0.0112037	0.0464241	Oogenic and Spermatogenic
C06A6.2	WBGene00015507	-1.09545	0.0112211	0.0464354	Oogenic only
mei-1	WBGene00003183	-0.455653	0.0112481	0.0465262	Oogenic only
him-3	WBGene00001862	0.355314	0.0113081	0.0467534	Oogenic and Spermatogenic
T13F2.6	WBGene00011746	0.364913	0.0113464	0.0468701	Oogenic and Spermatogenic
Y71H2AM.1	WBGene00022166	0.713052	0.0114266	0.0471413	Oogenic and Spermatogenic
nhl-2	WBGene00003598	-0.502416	0.0114587	0.0472084	Oogenic and Spermatogenic
cec-6	WBGene00020463	0.461075	0.0114873	0.0472763	Oogenic only
atg-2	WBGene00019748	-0.644126	0.0114906	0.0472763	Oogenic only
T20D3.8	WBGene00011860	0.548463	0.0115431	0.0474715	Oogenic only
tag-153	WBGene00006499	0.462516	0.011672	0.0479379	Oogenic only
rncs-1	WBGene00023069	-0.922935	0.0116982	0.048024	Oogenic and Spermatogenic
igcm-3	WBGene00020160	-0.935795	0.011795	0.0484003	Oogenic only
Y38C1AA.12	WBGene00021402	0.536068	0.0118035	0.0484137	Oogenic only
npp-9	WBGene00003795	-0.358352	0.0118332	0.0484926	Oogenic only
acl-4	WBGene00018657	-0.718068	0.0118419	0.0485069	Oogenic only
rig-4	WBGene00004371	-0.462941	0.0120475	0.0493271	Oogenic only
upb-1	WBGene00017440	0.535199	0.0120598	0.0493558	Oogenic and Spermatogenic
Y38F2AR.9	WBGene00021427	0.512496	0.0121431	0.0496747	Oogenic only
his-68	WBGene00001942	-0.792008	0.0121769	0.0497911	Oogenic only
gmps-1	WBGene00010912	0.381381	0.0122372	0.0500156	Oogenic only
rpac-40	WBGene00019275	-0.744413	0.0123303	0.0503741	Oogenic only
par-2	WBGene00003917	-0.57611	0.0123851	0.0505755	Oogenic only
gla-3	WBGene00011376	-0.465858	0.0124384	0.0507709	Oogenic only
T26A5.2	WBGene00020819	0.499254	0.0125315	0.0511283	Oogenic only
rsa-1	WBGene00007710	-0.624508	0.012546	0.0511545	Oogenic only
C46A5.5	WBGene00016701	0.474522	0.0125489	0.0511545	Oogenic only
sur-6	WBGene00006352	-0.397813	0.0125874	0.0512663	Oogenic only
F55H2.5	WBGene00010131	-0.76264	0.0125874	0.0512663	Oogenic only
Y54H5A.1	WBGene00021899	-0.590921	0.0126185	0.0513706	Oogenic only
W05H9.3	WBGene00021050	-0.565453	0.0126316	0.0514014	Spermatogenic only
W07G4.3	WBGene00012337	0.507656	0.0126404	0.0514146	Oogenic and Spermatogenic
C30H6.8	WBGene00007825	0.971009	0.0126801	0.0515453	Oogenic and Spermatogenic
unc-53	WBGene00006788	0.805232	0.0126836	0.0515453	Spermatogenic only
lin-13	WBGene00003002	0.417657	0.0126945	0.0515667	Oogenic only
mce-1	WBGene00008415	-0.43972	0.0127388	0.0517017	Oogenic only
F21F3.6	WBGene00017675	0.410371	0.0127359	0.0517017	Oogenic and Spermatogenic
ten-1	WBGene00006498	-0.785456	0.0127583	0.0517583	Oogenic only
edc-3	WBGene00011036	-0.487263	0.012826	0.0520102	Oogenic only
B0205.8	WBGene00015022	0.510674	0.0129238	0.0523608	Oogenic only
imp-3	WBGene00016378	-0.500464	0.0129316	0.0523696	Oogenic only
snap-1	WBGene00017016	-0.49903	0.0129871	0.0525623	Oogenic and Spermatogenic
pod-1	WBGene00004075	-0.374162	0.0129905	0.0525623	Oogenic only
C35C5.3	WBGene00007955	-0.725911	0.0130463	0.0527651	Oogenic only
W08F4.3	WBGene00021093	-0.460337	0.0131348	0.0531	Oogenic only
Y47D3A.29	WBGene00012936	-0.548228	0.0131657	0.0532018	Oogenic only
folt-2	WBGene00018138	-0.567406	0.0132076	0.0533478	Oogenic and Spermatogenic
col-166	WBGene00000739	0.909173	0.013273	0.053565	Oogenic and Spermatogenic
Y41D4B.4	WBGene00021512	0.441598	0.0132686	0.053565	Oogenic only
Y51H7C.3	WBGene00021781	-0.640013	0.013306	0.0536749	Oogenic only
pck-2	WBGene00011232	-0.492797	0.0133627	0.0538804	Oogenic and Spermatogenic
pat-12	WBGene00003936	0.475996	0.0134949	0.0543663	Oogenic only
R10E11.6	WBGene00011218	0.698029	0.0135116	0.0544099	Oogenic only
Y62H9A.3	WBGene00013391	-0.793299	0.0135339	0.0544759	Oogenic and Spermatogenic
samp-1	WBGene00011994	-0.462972	0.0137039	0.0551124	Oogenic and Spermatogenic
tre-2	WBGene00006608	0.57369	0.0137247	0.0551724	Oogenic and Spermatogenic
lin-61	WBGene00003041	0.454054	0.013844	0.0556276	Oogenic and Spermatogenic
F22D6.9	WBGene00009054	0.829088	0.0138548	0.0556471	Oogenic and Spermatogenic
mes-3	WBGene00003221	0.453891	0.0141165	0.0566002	Oogenic only
F10G7.9	WBGene00017372	0.595724	0.0142245	0.0570084	Oogenic only
ZC395.10	WBGene00022599	-0.474464	0.0142443	0.0570634	Oogenic and Spermatogenic
msh-5	WBGene00003421	0.444179	0.014403	0.0576494	Oogenic only
pab-2	WBGene00003903	-0.437338	0.014471	0.0578911	Oogenic and Spermatogenic
elo-2	WBGene00001240	0.533361	0.0145071	0.057991	Oogenic and Spermatogenic
drh-1	WBGene00001090	0.563402	0.0146463	0.058497	Oogenic only
rib-1	WBGene00004360	-0.581153	0.0146739	0.058582	Oogenic only
dnpp-1	WBGene00017163	0.541884	0.0146874	0.0586108	Oogenic only
calu-1	WBGene00019760	0.514034	0.014747	0.0588232	Oogenic and Spermatogenic
epg-6	WBGene00012641	-0.445223	0.0147696	0.058888	Oogenic only
T26A8.1	WBGene00020824	0.537963	0.0149298	0.0594501	Oogenic and Spermatogenic
T24B1.1	WBGene00011975	0.563357	0.0149498	0.0595043	Oogenic and Spermatogenic
T05F1.4	WBGene00011490	0.557837	0.0149814	0.0595788	Oogenic only
sec-12	WBGene00010496	0.528015	0.0150024	0.0596285	Oogenic and Spermatogenic
T05E7.3	WBGene00020259	-0.524133	0.0150067	0.0596285	Oogenic only
C25H3.11	WBGene00016120	0.829924	0.0152024	0.0603286	Oogenic only
glh-2	WBGene00001599	-0.458526	0.0152299	0.060412	Oogenic only
set-23	WBGene00021515	-0.97359	0.0154299	0.0611271	Oogenic only
F21C10.10	WBGene00017659	-0.736635	0.0155997	0.061747	Oogenic and Spermatogenic
hst-1	WBGene00002028	-0.572571	0.0157107	0.0621596	Oogenic only
F49E2.2	WBGene00009886	1.09472	0.0157656	0.0623502	Spermatogenic only
T23B12.6	WBGene00020721	-0.707954	0.0157903	0.0624216	Oogenic only
B0336.5	WBGene00015145	-0.515515	0.0158943	0.0628059	Oogenic only
paqr-1	WBGene00016610	0.44268	0.0159118	0.0628481	Oogenic and Spermatogenic
blmp-1	WBGene00003847	1.10448	0.0159192	0.0628509	Oogenic and Spermatogenic
hipr-1	WBGene00022717	-0.488573	0.0160007	0.063119	Oogenic only
gap-2	WBGene00001516	-0.752159	0.0160828	0.0634158	Oogenic only
nxf-1	WBGene00003834	-0.547537	0.0161996	0.0637679	Oogenic only
B0261.1	WBGene00015091	0.511307	0.01621	0.0637818	Oogenic only
lea-1	WBGene00002263	0.336904	0.0162372	0.0638346	Oogenic only
lec-6	WBGene00002269	0.487386	0.016267	0.0639249	Spermatogenic only
egl-13	WBGene00001182	0.935864	0.0163275	0.0641352	Oogenic and Spermatogenic
chn-1	WBGene00000500	-0.55709	0.0164188	0.0644667	Oogenic only
F11C1.5	WBGene00008694	-0.600231	0.0164661	0.064625	Oogenic only
C27A7.6	WBGene00007757	-0.433079	0.0165957	0.0650017	Oogenic only
mig-32	WBGene00008684	-0.38882	0.0165971	0.0650017	Oogenic only
Y73B6BL.4	WBGene00022233	0.491164	0.0165825	0.0650017	Oogenic only
pld-1	WBGene00004040	0.432217	0.0165941	0.0650017	Oogenic only
F02D8.4	WBGene00008521	0.92165	0.0166774	0.0652644	Spermatogenic only
let-413	WBGene00002632	-0.689182	0.0166782	0.0652644	Oogenic only
C05C10.3	WBGene00007330	-0.536389	0.0167142	0.0653501	Oogenic only
K07E3.4	WBGene00019492	-0.541712	0.0167115	0.0653501	Oogenic only
gap-3	WBGene00021238	0.577457	0.0169603	0.0662287	Oogenic only
F40E10.6	WBGene00009574	-0.530737	0.0171192	0.0667931	Oogenic only
orc-1	WBGene00012650	-0.773255	0.0171289	0.0668028	Oogenic only
tsr-1	WBGene00006647	0.473504	0.0171958	0.0670354	Oogenic only
Y57G11C.33	WBGene00013323	-0.449256	0.0172154	0.0670835	Oogenic only
F13H6.1	WBGene00017430	0.644451	0.0172884	0.06734	Spermatogenic only
alp-1	WBGene00001132	0.553928	0.0173487	0.0675464	Oogenic and Spermatogenic
T12C9.7	WBGene00020461	0.58511	0.0174904	0.0680697	Oogenic only
C52B9.4	WBGene00016867	-0.91517	0.0175109	0.0681209	Oogenic only
K03H1.7	WBGene00010542	-0.532742	0.0175223	0.0681366	Oogenic and Spermatogenic
psf-3	WBGene00022043	-0.492941	0.0175406	0.068179	Oogenic only
ZC328.3	WBGene00022593	0.974229	0.0176858	0.0687148	Oogenic and Spermatogenic
K11D2.4	WBGene00010770	0.729084	0.0177195	0.0688171	Oogenic and Spermatogenic
plst-1	WBGene00022425	-0.454609	0.0178118	0.0691175	Oogenic only
dhs-1	WBGene00000965	-0.545304	0.0178572	0.0692613	Oogenic only
D2023.6	WBGene00008410	0.629438	0.0178638	0.0692613	Oogenic only
ndk-1	WBGene00009119	-0.364094	0.0179069	0.0693997	Oogenic and Spermatogenic
abi-1	WBGene00015146	-0.736518	0.0179832	0.0696662	Oogenic only
Y62E10A.13	WBGene00013379	-0.417814	0.018013	0.0697526	Oogenic only
hda-6	WBGene00018319	0.515814	0.0180263	0.0697748	Oogenic only
F59C6.16	WBGene00077764	-0.820231	0.0180413	0.069804	Spermatogenic only
F42A8.1	WBGene00009626	0.596323	0.0180515	0.0698142	Oogenic and Spermatogenic
F13A7.14	WBGene00045357	0.584575	0.0180643	0.0698346	Oogenic only
sgt-1	WBGene00019893	0.477828	0.0181313	0.0700643	Oogenic only
T25B9.9	WBGene00012015	0.381055	0.0183745	0.0709747	Oogenic and Spermatogenic
C35A5.3	WBGene00007947	-0.875084	0.0183969	0.0710317	Oogenic and Spermatogenic
C41D11.9	WBGene00016567	-0.691738	0.0185523	0.0715422	Oogenic only
Y71H2AM.13	WBGene00022178	0.929893	0.0186262	0.0717379	Oogenic and Spermatogenic
sesn-1	WBGene00022279	0.574376	0.0186633	0.0718211	Oogenic only
R08E5.3	WBGene00019963	1.04063	0.0187757	0.072194	Oogenic only
C42D4.1	WBGene00016594	-0.570906	0.0187992	0.0722543	Spermatogenic only
F32D8.14	WBGene00009336	0.540556	0.0188253	0.0723247	Oogenic and Spermatogenic
kle-2	WBGene00016202	0.439897	0.0188414	0.0723564	Oogenic only
F52C12.2	WBGene00018679	-0.776684	0.0188646	0.0724158	Oogenic only
ZK643.5	WBGene00014036	-0.752266	0.0189568	0.0727096	Oogenic and Spermatogenic
madf-3	WBGene00019218	-0.83919	0.0190697	0.0730821	Oogenic only
F53H4.2	WBGene00010007	-0.763371	0.0192519	0.0737194	Oogenic and Spermatogenic
F14B4.2	WBGene00008780	-0.417573	0.0194582	0.0744789	Oogenic only
klp-18	WBGene00002228	-0.44328	0.019481	0.0745354	Oogenic only
guk-1	WBGene00020190	0.495669	0.0195795	0.0748812	Oogenic only
Y24D9A.8	WBGene00021286	0.628806	0.0196508	0.0751229	Oogenic only
mdt-27	WBGene00007023	0.510141	0.0197539	0.075486	Oogenic only
F44G4.2	WBGene00009712	0.531778	0.0197805	0.0755565	Oogenic and Spermatogenic
F33H2.2	WBGene00009366	0.483618	0.0198094	0.075636	Oogenic only
mrp-7	WBGene00003413	-0.526627	0.019874	0.0758514	Oogenic only
R144.6	WBGene00020096	-0.626778	0.0198825	0.0758528	Oogenic only
vit-3	WBGene00006927	-0.38304	0.0199375	0.0760311	Oogenic and Spermatogenic
Y66A7A.2	WBGene00013422	-0.92764	0.0200236	0.076328	Oogenic only
Y37A1B.17	WBGene00044989	-0.620535	0.0200513	0.0764025	Oogenic only
rnp-3	WBGene00004386	0.439998	0.020147	0.0766726	Oogenic only
nrde-2	WBGene00011333	0.419572	0.0201425	0.0766726	Oogenic only
F08F3.4	WBGene00017262	0.646027	0.0202076	0.0768452	Oogenic and Spermatogenic
ragc-1	WBGene00012497	-0.520612	0.0202089	0.0768452	Oogenic and Spermatogenic
sop-2	WBGene00004945	-0.976636	0.0202482	0.0769314	Oogenic only
aldo-1	WBGene00011474	0.434459	0.0202718	0.0769895	Oogenic and Spermatogenic
imb-1	WBGene00002075	-0.402336	0.0203023	0.077074	Oogenic only
immt-2	WBGene00012315	0.598665	0.020348	0.0771843	Oogenic and Spermatogenic
C01F1.1	WBGene00015296	0.466915	0.020344	0.0771843	Oogenic only
W04A8.6	WBGene00012241	-0.791284	0.0204009	0.0773219	Oogenic only
Y51F10.3	WBGene00021764	-0.541893	0.0204868	0.0776156	Oogenic only
R07E3.1	WBGene00011102	1.01098	0.0205213	0.0776829	Oogenic only
npp-20	WBGene00003806	0.423525	0.0205383	0.0777042	Oogenic only
sqst-1	WBGene00011737	-0.6819	0.0205437	0.0777042	Oogenic and Spermatogenic
xnp-1	WBGene00006961	0.373493	0.0205576	0.0777098	Oogenic only
sago-1	WBGene00019666	0.818911	0.0205619	0.0777098	Oogenic only
R09B3.2	WBGene00011155	-0.608951	0.0205926	0.0777941	Oogenic and Spermatogenic
rfc-3	WBGene00004339	-0.58947	0.0206787	0.0780876	Oogenic only
pbs-1	WBGene00003947	-0.466432	0.0208004	0.0784516	Oogenic and Spermatogenic
rrn-2.1	WBGene00004567	-0.475916	0.0207956	0.0784516	Oogenic and Spermatogenic
Y87G2A.11	WBGene00013599	-0.773151	0.0208403	0.0785702	Oogenic only
lron-7	WBGene00019351	-0.59047	0.0208544	0.0785915	Oogenic only
T23G4.3	WBGene00011959	0.519564	0.0210515	0.0792378	Oogenic only
C15C8.4	WBGene00007606	-0.720599	0.0211115	0.0793844	Oogenic only
C08B6.8	WBGene00007429	-0.761378	0.021119	0.0793844	Oogenic only
T22H9.1	WBGene00020705	-0.942932	0.0212057	0.0796564	Oogenic only
F25H9.6	WBGene00009138	-0.7676	0.0212362	0.0797389	Oogenic only
rap-2	WBGene00004308	-0.425819	0.0212551	0.0797777	Oogenic only
C09H10.5	WBGene00007499	0.496141	0.0212661	0.0797866	Oogenic only
otub-2	WBGene00021733	0.559545	0.0213046	0.0798989	Oogenic only
B0035.6	WBGene00007109	-0.388475	0.0213899	0.080186	Oogenic only
C25H3.14	WBGene00016123	1.12736	0.0214903	0.08053	Oogenic only
snrp-200	WBGene00012896	-0.446433	0.0216262	0.0810066	Oogenic only
gyg-1	WBGene00006863	0.509406	0.0217673	0.0815022	Oogenic and Spermatogenic
ZK1307.1	WBGene00014244	0.941205	0.0218787	0.0818658	Oogenic and Spermatogenic
hil-5	WBGene00001856	-0.360195	0.0219488	0.0820823	Oogenic and Spermatogenic
rab-21	WBGene00004279	0.615672	0.0220248	0.0823004	Oogenic only
dog-1	WBGene00001049	0.458063	0.0223366	0.0833312	Oogenic only
mboa-6	WBGene00020115	-0.419225	0.0223573	0.0833752	Oogenic only
sop-3	WBGene00004946	-0.486285	0.0224712	0.0837326	Oogenic only
rps-29	WBGene00004498	-0.420812	0.0224827	0.0837419	Oogenic and Spermatogenic
Y108G3AL.2	WBGene00022434	-0.761851	0.0225121	0.0838177	Oogenic only
taf-11.3	WBGene00006395	-0.936339	0.0226102	0.0841155	Oogenic only
coh-3	WBGene00000592	0.504165	0.0227897	0.0847152	Oogenic only
vit-1	WBGene00006925	-0.3504	0.022901	0.0850608	Oogenic and Spermatogenic
C27B7.9	WBGene00007765	-0.867722	0.0229394	0.0851695	Spermatogenic only
wdr-5.1	WBGene00006474	-0.555716	0.0229492	0.0851716	Oogenic only
Y57A10A.5	WBGene00013250	0.530443	0.023088	0.0856185	Oogenic only
F53F4.12	WBGene00009994	0.628496	0.0230986	0.0856234	Oogenic only
Y66H1A.4	WBGene00022046	-0.437166	0.0231417	0.0857492	Oogenic only
K04C2.3	WBGene00019381	0.396954	0.0231532	0.0857574	Oogenic only
bre-4	WBGene00000269	0.916091	0.0232505	0.0860489	Oogenic and Spermatogenic
C09E9.1	WBGene00007476	-0.636666	0.023305	0.0862166	Oogenic only
ari-1	WBGene00016158	0.441933	0.0234257	0.0866286	Oogenic and Spermatogenic
Y65A5A.2	WBGene00013419	-0.531586	0.0235977	0.0871603	Oogenic and Spermatogenic
K08A2.1	WBGene00019511	0.733628	0.0236396	0.0872804	Oogenic and Spermatogenic
dnj-5	WBGene00001023	-0.338968	0.0236593	0.0872899	Oogenic only
lst-3	WBGene00003085	-0.451675	0.0237322	0.0875178	Oogenic and Spermatogenic
inx-5	WBGene00002127	0.775192	0.0237619	0.0875576	Oogenic and Spermatogenic
F01G4.4	WBGene00008503	0.353615	0.0237954	0.0876464	Oogenic only
T01B7.5	WBGene00011311	-0.677521	0.0238479	0.0878048	Oogenic only
ZK512.7	WBGene00013986	0.541582	0.023879	0.0878845	Spermatogenic only
C36B7.6	WBGene00016469	-0.799949	0.0239174	0.0879912	Oogenic only
Y39A1A.24	WBGene00012660	0.520435	0.0239566	0.0881003	Oogenic and Spermatogenic
D1081.7	WBGene00008385	-0.36698	0.0239877	0.0881799	Oogenic only
sac-1	WBGene00009264	0.494338	0.0240336	0.0882786	Oogenic and Spermatogenic
ahcy-1	WBGene00019322	0.355212	0.0241591	0.0886342	Oogenic and Spermatogenic
F20D1.1	WBGene00008973	0.468804	0.0242396	0.0888593	Oogenic only
pde-4	WBGene00020114	0.497992	0.024251	0.088866	Spermatogenic only
unc-71	WBGene00006804	-0.489953	0.0243538	0.0892061	Oogenic only
taf-2	WBGene00006383	-0.642504	0.0244937	0.0896138	Oogenic only
T19H5.4	WBGene00011849	-0.692159	0.0245198	0.089674	Oogenic only
W01G7.4	WBGene00012188	-0.690973	0.0246011	0.0899358	Oogenic only
ima-1	WBGene00002072	-0.483071	0.0247217	0.0902702	Oogenic only
dylt-1	WBGene00008764	0.37519	0.0248061	0.0905428	Oogenic only
pgam-5	WBGene00019941	0.460593	0.0248358	0.0906154	Oogenic and Spermatogenic
ZC513.7	WBGene00023209	-0.376264	0.0248976	0.0908054	Spermatogenic only
C56C10.10	WBGene00016966	-0.405495	0.0250766	0.0913504	Oogenic only
rsp-2	WBGene00004699	0.379169	0.0250673	0.0913504	Oogenic and Spermatogenic
T25G3.4	WBGene00012031	0.483344	0.0250658	0.0913504	Oogenic and Spermatogenic
ugt-44	WBGene00008486	0.706295	0.025124	0.0914871	Spermatogenic only
Y105C5B.5	WBGene00013647	-0.545985	0.0251381	0.0915026	Spermatogenic only
dnj-25	WBGene00001043	-0.434824	0.0253668	0.0922991	Oogenic only
mlp-1	WBGene00003375	0.647111	0.0254048	0.0924009	Oogenic and Spermatogenic
F53F4.16	WBGene00023419	0.522875	0.0254176	0.0924113	Oogenic only
alh-6	WBGene00000112	0.50346	0.0255146	0.0927276	Oogenic only
mek-2	WBGene00003186	-0.576639	0.0255475	0.0927817	Oogenic only
cpg-4	WBGene00015677	-0.499694	0.0256008	0.0929319	Oogenic and Spermatogenic
erp-1	WBGene00001335	-0.88323	0.0256562	0.0930771	Oogenic only
hsr-9	WBGene00002027	-0.365597	0.0256609	0.0930771	Oogenic only
Y39F10B.1	WBGene00021456	0.403011	0.0256738	0.0930876	Oogenic only
C47E12.3	WBGene00008148	0.515795	0.025766	0.0933854	Oogenic only
gna-1	WBGene00001646	0.984949	0.0259053	0.0938168	Oogenic only
R06A4.2	WBGene00011047	0.517747	0.02598	0.0940508	Oogenic only
pcp-3	WBGene00003958	0.777868	0.0259975	0.0940776	Oogenic and Spermatogenic
ddx-17	WBGene00010260	-0.361771	0.0260564	0.0942198	Oogenic and Spermatogenic
F48D6.4	WBGene00018602	-0.493305	0.0260571	0.0942198	Spermatogenic only
daf-3	WBGene00000899	-0.908564	0.0260837	0.0942453	Oogenic only
num-1	WBGene00003830	-0.485473	0.0260845	0.0942453	Oogenic only
mon-2	WBGene00008685	0.418941	0.0261595	0.0944796	Oogenic only
Y77E11A.7	WBGene00022310	-0.537894	0.026226	0.0946829	Oogenic only
H04D03.2	WBGene00010363	0.491649	0.0264497	0.0953794	Oogenic only
cas-1	WBGene00000294	0.495058	0.0266136	0.0958958	Oogenic only
T22C1.4	WBGene00011915	-0.851563	0.0266476	0.0959499	Oogenic only
isp-1	WBGene00002162	0.386789	0.0267518	0.0962817	Oogenic and Spermatogenic
F33E11.3	WBGene00018011	-0.514062	0.0269377	0.096913	Oogenic only
tbc-7	WBGene00016292	0.738713	0.0271156	0.0974776	Spermatogenic only
C23H5.8	WBGene00016027	-0.753828	0.0271554	0.0975829	Oogenic and Spermatogenic
Y67H2A.2	WBGene00013461	0.704964	0.0272287	0.0978084	Oogenic and Spermatogenic
T25C12.3	WBGene00012018	0.419104	0.0273204	0.0980619	Oogenic and Spermatogenic
C26B9.5	WBGene00016134	0.987037	0.0274121	0.0983528	Oogenic and Spermatogenic
Y55B1AR.2	WBGene00021906	0.454638	0.0275801	0.0988031	Oogenic only
B0035.1	WBGene00007105	0.496832	0.0276023	0.0988443	Oogenic only
dld-1	WBGene00010794	0.419215	0.0276484	0.0989713	Oogenic and Spermatogenic
pas-2	WBGene00003923	-0.531532	0.0277072	0.0991052	Oogenic only
dcap-1	WBGene00021929	-0.399125	0.0277336	0.0991617	Oogenic only
F53C11.3	WBGene00009973	-0.749227	0.0277701	0.0992539	Oogenic and Spermatogenic
wdr-20	WBGene00007428	-0.323771	0.0278484	0.0993805	Oogenic only
ppw-2	WBGene00004094	-0.46098	0.0278396	0.0993805	Oogenic only
hmp-2	WBGene00001979	-0.623438	0.0278283	0.0993805	Oogenic only
W04D2.4	WBGene00012243	-0.692089	0.0278306	0.0993805	Oogenic only
F44E2.7	WBGene00018420	-0.599553	0.0279	0.0995265	Oogenic only
nhr-66	WBGene00003656	-0.508856	0.0279637	0.0997152	Oogenic only
sur-2	WBGene00006349	-0.521859	0.0280052	0.0997356	Oogenic only
drr-2	WBGene00011730	0.384411	0.0281953	0.10031	Oogenic only
thk-1	WBGene00006568	-0.542541	0.0282188	0.100355	Oogenic only
R08E3.1	WBGene00019957	0.487109	0.0284629	0.101074	Oogenic and Spermatogenic
aak-1	WBGene00019801	0.368654	0.0285195	0.101217	Oogenic only
Y45F10B.13	WBGene00012875	0.706103	0.0285266	0.101217	Spermatogenic only
Y106G6H.16	WBGene00013726	0.644135	0.0287207	0.101789	Oogenic only
Y71H2AM.9	WBGene00022174	0.526167	0.0287351	0.101801	Oogenic and Spermatogenic
C15H9.5	WBGene00015801	-0.784097	0.028764	0.101865	Oogenic only
W09C5.8	WBGene00012354	-0.48383	0.0287844	0.101898	Oogenic and Spermatogenic
H28G03.2	WBGene00019250	-0.720681	0.0288793	0.102156	Oogenic only
snf-6	WBGene00004905	-0.527417	0.0289559	0.102349	Oogenic only
T09B9.4	WBGene00011645	-0.781778	0.0289472	0.102349	Oogenic only
K07A1.9	WBGene00010615	0.477733	0.0290423	0.102576	Oogenic only
rom-5	WBGene00004404	-0.858055	0.029109	0.102773	Oogenic only
scc-1	WBGene00004737	0.44329	0.0291292	0.102805	Oogenic only
ZK813.1	WBGene00022820	-0.529026	0.0291664	0.102897	Oogenic and Spermatogenic
Y71F9AL.1	WBGene00022107	-0.729123	0.0292011	0.10298	Oogenic and Spermatogenic
Y97E10C.1	WBGene00022410	0.812178	0.0293081	0.103319	Oogenic and Spermatogenic
cuc-1	WBGene00000835	0.496084	0.0295204	0.10396	Oogenic only
F54C8.4	WBGene00010037	-0.470516	0.0295235	0.10396	Oogenic only
F32B5.6	WBGene00017979	0.585541	0.0295177	0.10396	Oogenic only
wago-2	WBGene00018862	-0.427271	0.0296609	0.104364	Oogenic only
Y22D7AL.10	WBGene00021248	-0.436001	0.0298304	0.104881	Oogenic only
paa-1	WBGene00003901	-0.33031	0.0300883	0.105588	Oogenic and Spermatogenic
Y102E9.2	WBGene00022420	-0.413593	0.0301652	0.105791	Oogenic only
Y57A10A.23	WBGene00013263	0.75778	0.0301691	0.105791	Oogenic only
rpl-5	WBGene00004416	0.370361	0.0304822	0.106808	Oogenic and Spermatogenic
dpy-21	WBGene00001080	-0.410494	0.0304936	0.106808	Oogenic only
F10G7.10	WBGene00017373	0.58804	0.0306076	0.107167	Oogenic only
rpb-5	WBGene00019246	-0.617478	0.0306451	0.107258	Oogenic only
mbk-1	WBGene00003149	-0.818869	0.0307223	0.107487	Oogenic only
F35G2.1	WBGene00009435	0.371083	0.0307345	0.10749	Oogenic only
C05D12.3	WBGene00014666	0.677474	0.0310258	0.108468	Oogenic and Spermatogenic
mdf-2	WBGene00003161	-0.505283	0.0311139	0.108735	Oogenic only
arf-3	WBGene00000183	0.327256	0.0311525	0.108778	Oogenic and Spermatogenic
pmp-3	WBGene00004060	-0.386271	0.0313339	0.109298	Oogenic only
usp-14	WBGene00006856	-0.391579	0.0313646	0.109353	Oogenic only
B0303.3	WBGene00015125	0.337447	0.0313734	0.109353	Oogenic and Spermatogenic
ZK328.4	WBGene00022694	0.452093	0.0314089	0.109417	Oogenic and Spermatogenic
npa-1	WBGene00003786	0.438092	0.0316938	0.110304	Oogenic and Spermatogenic
usp-48	WBGene00009267	0.439409	0.0318285	0.110732	Oogenic only
T04G9.7	WBGene00020218	-0.651709	0.0318983	0.110933	Oogenic and Spermatogenic
R12E2.1	WBGene00020030	-0.633082	0.03207	0.111418	Oogenic only
hpk-1	WBGene00001994	-0.401756	0.0320738	0.111418	Oogenic only
set-17	WBGene00011887	0.509083	0.0321017	0.111473	Oogenic only
sphk-1	WBGene00007918	0.554499	0.0321905	0.11174	Oogenic and Spermatogenic
T19B10.2	WBGene00011831	0.715283	0.0322159	0.111745	Oogenic only
F26F12.3	WBGene00017834	-0.406321	0.0326002	0.113035	Oogenic and Spermatogenic
F57C2.5	WBGene00010197	-0.579265	0.0326823	0.113235	Oogenic only
psf-1	WBGene00011275	-0.634004	0.032777	0.113482	Oogenic only
Y54F10AM.11	WBGene00021853	-0.626726	0.0327778	0.113482	Oogenic only
Y4C6B.1	WBGene00021155	-0.597556	0.0329354	0.113857	Oogenic only
nhr-49	WBGene00003639	-0.353453	0.0329973	0.114029	Oogenic only
K09E4.2	WBGene00010720	-0.730322	0.0331016	0.114347	Oogenic only
Y92H12BL.5	WBGene00022366	-0.743938	0.03319	0.114609	Oogenic only
lpd-7	WBGene00003063	0.451321	0.0332396	0.114695	Oogenic only
Y23H5A.3	WBGene00021270	-0.594982	0.0333468	0.115022	Oogenic and Spermatogenic
F32B4.4	WBGene00009314	0.451368	0.03392	0.116826	Oogenic and Spermatogenic
tam-1	WBGene00006523	-0.420579	0.0339932	0.117034	Oogenic only
dim-1	WBGene00001000	0.390852	0.0340542	0.117201	Oogenic only
xpo-3	WBGene00002080	-0.368277	0.0344037	0.118316	Oogenic only
F56F10.1	WBGene00018984	0.829009	0.0345121	0.118645	Oogenic and Spermatogenic
ire-1	WBGene00002147	0.382386	0.0345676	0.118792	Oogenic only
C25H3.4	WBGene00016113	0.385363	0.0347184	0.119266	Oogenic only
tbb-1	WBGene00006536	-0.320816	0.0347737	0.119389	Oogenic and Spermatogenic
fum-1	WBGene00001503	0.378408	0.0347889	0.119389	Oogenic only
ddx-23	WBGene00017162	0.482178	0.0348331	0.119439	Oogenic only
D1081.9	WBGene00008387	0.433851	0.0350116	0.120006	Oogenic only
T07C4.3	WBGene00011560	-0.363881	0.0352129	0.120553	Oogenic only
F32B6.3	WBGene00009320	0.514186	0.035223	0.120553	Oogenic only
tag-72	WBGene00006447	0.540364	0.0353098	0.120708	Oogenic only
dhs-6	WBGene00000970	-0.467743	0.035292	0.120708	Oogenic only
swsn-9	WBGene00007256	-0.368349	0.0353798	0.120822	Oogenic only
T07A5.5	WBGene00011558	0.782672	0.0354675	0.121077	Oogenic and Spermatogenic
egl-19	WBGene00001187	0.575349	0.0355943	0.121376	Spermatogenic only
cpna-1	WBGene00006495	0.527204	0.0355925	0.121376	Oogenic and Spermatogenic
alh-11	WBGene00000117	0.723652	0.0356532	0.121532	Oogenic and Spermatogenic
lgg-2	WBGene00002981	-0.325355	0.0357465	0.121764	Oogenic only
knl-1	WBGene00002231	0.385768	0.0357942	0.121834	Oogenic and Spermatogenic
copa-1	WBGene00022119	0.364288	0.0357933	0.121834	Oogenic and Spermatogenic
fnci-1	WBGene00020935	0.50881	0.0359505	0.122321	Oogenic only
pisy-1	WBGene00012897	-0.323821	0.0360037	0.122457	Oogenic only
crm-1	WBGene00007103	0.847612	0.036502	0.124061	Oogenic and Spermatogenic
F56A8.3	WBGene00010139	0.439669	0.0366671	0.124531	Oogenic only
T03D3.5	WBGene00020183	0.664711	0.0367602	0.124756	Oogenic only
F31C3.2	WBGene00009284	0.498151	0.0369146	0.125234	Oogenic only
rpl-3	WBGene00004414	0.348339	0.037024	0.125514	Oogenic and Spermatogenic
mrps-35	WBGene00012697	-0.570961	0.0370204	0.125514	Oogenic only
F37C4.5	WBGene00018145	0.404154	0.0371183	0.125742	Oogenic and Spermatogenic
B0035.12	WBGene00007111	-0.383178	0.0371647	0.125853	Oogenic only
ptrn-1	WBGene00004121	-0.616448	0.0372019	0.125933	Oogenic only
mel-11	WBGene00003196	0.407482	0.0372283	0.125976	Oogenic only
pqn-44	WBGene00004131	0.47897	0.0374928	0.126687	Spermatogenic only
swsn-6	WBGene00022774	0.369262	0.0374911	0.126687	Oogenic only
dnj-23	WBGene00001041	-0.382837	0.0374664	0.126687	Oogenic only
mtm-6	WBGene00003478	-0.591173	0.0375992	0.126908	Oogenic only
rfc-2	WBGene00004338	-0.825498	0.0379398	0.127871	Oogenic only
Y75B8A.25	WBGene00013558	0.375389	0.0379574	0.127884	Oogenic only
F53F10.2	WBGene00018764	-0.374394	0.038154	0.128462	Oogenic and Spermatogenic
ceh-38	WBGene00000459	-0.359441	0.0384619	0.129349	Oogenic only
Y39B6A.16	WBGene00012678	0.618159	0.0385077	0.129456	Oogenic and Spermatogenic
rpl-37	WBGene00004451	-0.522826	0.0385651	0.129602	Oogenic only
F41C3.4	WBGene00018270	0.406486	0.0386634	0.129886	Oogenic and Spermatogenic
C10G8.8	WBGene00015684	0.708056	0.0388726	0.130541	Spermatogenic only
D1054.3	WBGene00008371	-0.446534	0.0389654	0.130805	Oogenic and Spermatogenic
F42A9.6	WBGene00018335	0.412028	0.0390945	0.131144	Oogenic only
Y69H2.3	WBGene00013481	-0.4478	0.0391925	0.131425	Oogenic only
npp-16	WBGene00003802	-0.437773	0.0393342	0.131805	Oogenic only
imb-2	WBGene00002076	-0.378028	0.0393262	0.131805	Oogenic only
tag-342	WBGene00007187	-0.662833	0.039373	0.13184	Oogenic only
nex-2	WBGene00003589	0.592653	0.0396426	0.132551	Oogenic and Spermatogenic
rbg-3	WBGene00007167	-0.369097	0.0398639	0.133243	Oogenic only
R02F2.1	WBGene00019831	-0.369959	0.0398807	0.133252	Oogenic only
C14B9.10	WBGene00015755	0.347508	0.0399209	0.133338	Oogenic and Spermatogenic
dsc-4	WBGene00001099	0.857902	0.0399459	0.133373	Oogenic and Spermatogenic
tol-1	WBGene00006593	-0.332569	0.0399938	0.133389	Oogenic only
attf-6	WBGene00012474	0.40005	0.0399848	0.133389	Oogenic only
plk-1	WBGene00004042	-0.349907	0.0399766	0.133389	Oogenic only
pptr-2	WBGene00007554	0.475258	0.0400433	0.133506	Oogenic only
Y48G1C.12	WBGene00044345	-0.330153	0.0402599	0.134132	Oogenic only
pfn-1	WBGene00003989	-0.371175	0.0403213	0.134289	Oogenic only
knl-3	WBGene00020392	0.360918	0.0403997	0.134501	Oogenic only
cts-1	WBGene00000833	0.306932	0.0404729	0.134648	Oogenic and Spermatogenic
K04F10.7	WBGene00019399	-0.362595	0.0406065	0.135045	Oogenic only
C54E4.2	WBGene00016918	0.517209	0.0406604	0.135175	Oogenic and Spermatogenic
F48E3.4	WBGene00018605	-0.549495	0.0409276	0.135966	Oogenic and Spermatogenic
magi-1	WBGene00010444	-0.743071	0.0412518	0.136945	Oogenic only
F54B3.1	WBGene00010013	0.358906	0.0414611	0.137591	Oogenic only
vti-1	WBGene00013302	-0.55599	0.0414799	0.137604	Oogenic only
wdr-48	WBGene00009441	-0.462951	0.0415511	0.137791	Oogenic only
icp-1	WBGene00002047	-0.31897	0.04165	0.137971	Oogenic only
dgk-2	WBGene00000959	-0.627183	0.0416393	0.137971	Oogenic only
Y48G10A.2	WBGene00013019	0.430985	0.0417467	0.138242	Oogenic only
C14B1.8	WBGene00007579	0.769482	0.0419189	0.138763	Oogenic only
ZK265.6	WBGene00013958	-0.646865	0.0420699	0.139164	Oogenic only
vit-5	WBGene00006929	-0.320556	0.0421388	0.139342	Oogenic and Spermatogenic
rnf-5	WBGene00004381	-0.403392	0.042232	0.1396	Oogenic and Spermatogenic
T22D1.3	WBGene00020682	0.415242	0.0423372	0.139898	Oogenic only
ncs-2	WBGene00003564	0.382069	0.0424884	0.140298	Oogenic and Spermatogenic
ensa-1	WBGene00010730	0.331094	0.0425246	0.140367	Oogenic only
Y51H1A.2	WBGene00013093	-0.495374	0.0428139	0.141222	Oogenic only
zig-1	WBGene00006978	0.821411	0.0429089	0.141485	Oogenic and Spermatogenic
Y43F8B.1	WBGene00012812	0.456146	0.043124	0.142068	Oogenic and Spermatogenic
F57C9.1	WBGene00019008	0.446977	0.0431318	0.142068	Oogenic only
F41G3.6	WBGene00018302	-1.05524	0.0432076	0.142268	Oogenic only
F09C8.2	WBGene00008622	-0.513745	0.0434373	0.142973	Oogenic only
ZK973.11	WBGene00022836	-0.568556	0.0435077	0.143099	Oogenic and Spermatogenic
pck-1	WBGene00021043	0.405233	0.0435686	0.143152	Oogenic and Spermatogenic
C08B11.9	WBGene00007436	0.503726	0.0435538	0.143152	Oogenic and Spermatogenic
T09A12.5	WBGene00020374	0.616667	0.0436571	0.143341	Oogenic and Spermatogenic
unc-45	WBGene00006781	-0.477028	0.0437569	0.143534	Oogenic only
hpo-13	WBGene00013670	0.431976	0.0437621	0.143534	Oogenic only
pmt-2	WBGene00018811	0.373161	0.0438449	0.143703	Oogenic and Spermatogenic
nfyc-1	WBGene00017742	-0.581228	0.0438635	0.143714	Oogenic and Spermatogenic
F02E9.5	WBGene00008530	0.50906	0.0440711	0.144241	Oogenic and Spermatogenic
C27C7.1	WBGene00007766	-0.41093	0.0440709	0.144241	Oogenic only
sec-24.1	WBGene00004755	0.31527	0.0442463	0.144764	Oogenic only
let-526	WBGene00002717	0.312184	0.044312	0.144927	Oogenic and Spermatogenic
capg-2	WBGene00010093	-0.423994	0.0443743	0.14508	Oogenic only
nipa-1	WBGene00021820	0.535431	0.0444733	0.145312	Oogenic and Spermatogenic
cblc-1	WBGene00022766	0.38391	0.0444766	0.145312	Oogenic only
col-179	WBGene00000752	0.396682	0.0446424	0.145751	Spermatogenic only
lbp-5	WBGene00002257	0.877734	0.0447101	0.145921	Oogenic and Spermatogenic
dur-1	WBGene00001113	0.755073	0.0447945	0.146121	Oogenic and Spermatogenic
Y71H2B.11	WBGene00022198	-0.843786	0.0449558	0.146465	Oogenic and Spermatogenic
C14F11.4	WBGene00015780	0.697455	0.0449717	0.146466	Oogenic and Spermatogenic
zyx-1	WBGene00006999	0.352859	0.0450422	0.146592	Oogenic and Spermatogenic
phf-15	WBGene00021810	-0.411133	0.0450782	0.146658	Oogenic only
E01B7.1	WBGene00008441	-0.66077	0.0455666	0.148162	Oogenic only
C08H9.2	WBGene00007463	0.294326	0.0457733	0.148763	Oogenic and Spermatogenic
eme-1	WBGene00018923	0.566011	0.0458624	0.149001	Oogenic only
F53F4.11	WBGene00009993	0.419304	0.0459365	0.149148	Oogenic only
Y67D8A.10	WBGene00235356	-0.338555	0.0459398	0.149148	Oogenic and Spermatogenic
C18B2.3	WBGene00015954	0.682359	0.0462464	0.150091	Oogenic and Spermatogenic
tiar-1	WBGene00015943	-0.334131	0.0462634	0.150093	Oogenic only
cpb-3	WBGene00000772	-0.834202	0.0462996	0.150158	Oogenic only
F56C9.11	WBGene00018954	0.428641	0.0463407	0.150239	Oogenic and Spermatogenic
F27C1.2	WBGene00017852	-0.435419	0.0465221	0.150774	Oogenic only
nid-1	WBGene00003738	0.591531	0.0465495	0.15078	Oogenic and Spermatogenic
cpg-7	WBGene00010723	1.00166	0.0466944	0.151069	Spermatogenic only
asb-1	WBGene00000206	0.419034	0.0467422	0.151171	Oogenic and Spermatogenic
F55A3.3	WBGene00018849	0.331878	0.046928	0.15165	Oogenic only
T22C1.5	WBGene00011916	-0.695407	0.0469507	0.15165	Oogenic only
C16B8.3	WBGene00015823	0.748675	0.0469276	0.15165	Oogenic and Spermatogenic
M05D6.5	WBGene00010878	0.6424	0.0473801	0.152867	Oogenic only
par-1	WBGene00003916	0.298868	0.0473819	0.152867	Oogenic only
Y41D4A.5	WBGene00021507	-0.352381	0.0474699	0.153098	Oogenic and Spermatogenic
dnj-14	WBGene00001032	-0.737819	0.0475075	0.153166	Oogenic only
F09A5.4	WBGene00008601	-0.530763	0.0475474	0.153241	Oogenic only
Y42H9AR.1	WBGene00021536	0.37855	0.0476684	0.153578	Oogenic only
rad-54	WBGene00004298	0.319125	0.0477068	0.153648	Oogenic only
pqn-20	WBGene00004110	-0.424421	0.0478549	0.154072	Oogenic only
drsh-1	WBGene00009163	-0.538223	0.0480172	0.154434	Oogenic only
T23B12.11	WBGene00044553	0.737092	0.0480014	0.154434	Spermatogenic only
lsm-4	WBGene00003078	-0.67541	0.0482214	0.154929	Oogenic only
rsu-1	WBGene00007924	0.548926	0.0484444	0.155592	Oogenic only
C27F2.9	WBGene00043156	-0.532886	0.0487616	0.156483	Oogenic and Spermatogenic
C24H12.4	WBGene00016073	-0.568203	0.0487725	0.156483	Oogenic only
Y48G1A.2	WBGene00021658	-0.457666	0.0488247	0.156597	Oogenic only
F54A3.5	WBGene00018784	0.481918	0.0488545	0.156638	Oogenic only
eif-6	WBGene00001234	-0.473243	0.0492461	0.15773	Oogenic only
mig-14	WBGene00003246	-0.575828	0.0492964	0.157837	Oogenic only
pitr-1	WBGene00016739	-0.303315	0.049495	0.158418	Oogenic and Spermatogenic
set-10	WBGene00009370	0.711668	0.0498301	0.159381	Oogenic and Spermatogenic
nmat-2	WBGene00009176	0.697646	0.0501168	0.160242	Oogenic only
fbxc-45	WBGene00021887	-0.4386	0.0501443	0.160275	Oogenic only
fozi-1	WBGene00010453	0.680844	0.0503982	0.160976	Spermatogenic only
dhs-25	WBGene00000988	-0.73209	0.0504398	0.161022	Oogenic and Spermatogenic
rps-27	WBGene00004496	-0.302105	0.0504472	0.161022	Oogenic and Spermatogenic
C54C6.6	WBGene00008288	-0.73886	0.0506912	0.161745	Oogenic only
patr-1	WBGene00009661	-0.38985	0.0508942	0.162337	Oogenic only
Y71G10AL.1	WBGene00022134	-0.417801	0.0509555	0.162477	Oogenic only
K08E4.3	WBGene00010667	-0.720967	0.0510951	0.162865	Oogenic and Spermatogenic
mmcm-1	WBGene00014202	-0.305801	0.0513244	0.163484	Oogenic and Spermatogenic
aly-2	WBGene00000121	-0.507244	0.0514111	0.163648	Oogenic only
ZK1067.2	WBGene00014208	0.327184	0.0516799	0.164391	Oogenic and Spermatogenic
fat-3	WBGene00001395	-0.534424	0.0517584	0.164472	Oogenic only
C49C3.6	WBGene00008196	-0.709407	0.0517975	0.164521	Oogenic only
paqr-2	WBGene00021313	0.419098	0.0518094	0.164521	Oogenic only
Y67H2A.5	WBGene00013463	0.37417	0.0518788	0.164685	Oogenic and Spermatogenic
vms-1	WBGene00019457	-0.586349	0.0520349	0.165073	Oogenic only
ucr-2.3	WBGene00020757	0.48303	0.0520365	0.165073	Oogenic only
T03F1.11	WBGene00020192	0.812237	0.0520739	0.165135	Spermatogenic only
cct-8	WBGene00021934	-0.439367	0.0521197	0.165167	Oogenic only
R07E5.7	WBGene00011115	-0.52988	0.0521646	0.165253	Oogenic only
Y59E9AL.36	WBGene00195093	0.39106	0.0522034	0.16532	Oogenic only
Y59A8B.10	WBGene00013347	-0.458618	0.0522373	0.165371	Oogenic only
cdc-26	WBGene00015235	-0.395895	0.0523087	0.165484	Oogenic only
zim-1	WBGene00011597	0.386531	0.0524456	0.16581	Oogenic only
T19D12.1	WBGene00020576	0.827431	0.0524475	0.16581	Oogenic and Spermatogenic
C48B6.10	WBGene00016746	0.518107	0.0526092	0.166208	Oogenic and Spermatogenic
ctl-2	WBGene00000831	-0.649516	0.0530109	0.167306	Oogenic and Spermatogenic
C28H8.4	WBGene00016195	0.34924	0.0529997	0.167306	Oogenic and Spermatogenic
wapl-1	WBGene00019953	-0.317286	0.0530327	0.167318	Oogenic only
ubq-1	WBGene00006727	-0.319583	0.0531447	0.167614	Oogenic and Spermatogenic
aspm-1	WBGene00008107	0.349167	0.0532809	0.167987	Oogenic only
rnp-1	WBGene00004384	-0.477575	0.0533859	0.168229	Oogenic only
mcd-1	WBGene00013096	-0.554131	0.0533941	0.168229	Oogenic only
C34F6.7	WBGene00007941	-0.763984	0.0535057	0.168524	Oogenic only
F54D5.4	WBGene00010050	0.693291	0.0535569	0.168588	Spermatogenic only
bath-15	WBGene00015590	-0.489727	0.0537668	0.169002	Oogenic only
his-37	WBGene00001911	0.46613	0.0538239	0.169124	Oogenic and Spermatogenic
ger-1	WBGene00019813	0.835594	0.0539505	0.169465	Oogenic and Spermatogenic
cpn-1	WBGene00000777	-0.422153	0.0539917	0.169537	Oogenic and Spermatogenic
lipl-5	WBGene00022642	0.390642	0.0544112	0.170739	Spermatogenic only
lin-8	WBGene00002997	-0.66714	0.054623	0.171287	Oogenic and Spermatogenic
lam-1	WBGene00002247	0.356807	0.0548091	0.171697	Oogenic only
F40F4.6	WBGene00018237	0.36255	0.0548456	0.171753	Oogenic and Spermatogenic
C09D4.4	WBGene00015635	0.356491	0.0549649	0.172069	Oogenic only
C13F10.5	WBGene00015744	-0.789878	0.0550857	0.172389	Oogenic only
C01G5.5	WBGene00015307	-0.486223	0.055242	0.172703	Oogenic and Spermatogenic
ZK546.2	WBGene00022759	-0.381076	0.0555078	0.173301	Oogenic only
W02D7.6	WBGene00020942	-0.813456	0.055493	0.173301	Oogenic only
mdt-21	WBGene00007704	-0.711667	0.05561	0.173561	Oogenic only
unc-60	WBGene00006794	-0.330964	0.0557828	0.174042	Oogenic and Spermatogenic
F55H2.7	WBGene00010132	0.425005	0.0558999	0.174297	Oogenic only
fecl-1	WBGene00010645	0.54456	0.055902	0.174297	Oogenic and Spermatogenic
csb-1	WBGene00000803	-0.800549	0.0559912	0.174458	Oogenic only
mom-4	WBGene00003396	-0.393785	0.0562221	0.174999	Oogenic only
cyp-31A5	WBGene00013381	-0.761955	0.0562403	0.174999	Oogenic only
rcq-5	WBGene00004322	0.373382	0.0566221	0.17601	Oogenic and Spermatogenic
glod-4	WBGene00006448	-0.801698	0.0566576	0.176062	Oogenic only
C15C6.3	WBGene00007602	-0.657822	0.0566797	0.176071	Oogenic only
Y53G8AR.6	WBGene00021813	-0.534009	0.0567929	0.176305	Oogenic only
tbc-17	WBGene00012894	0.355838	0.0568484	0.176418	Oogenic only
plx-1	WBGene00004047	-0.379583	0.0569628	0.176714	Oogenic only
atf-7	WBGene00000223	-0.411592	0.0569876	0.176732	Oogenic only
Y94H6A.17	WBGene00235348	0.648181	0.0570865	0.176831	Oogenic and Spermatogenic
Y105E8A.21	WBGene00013679	-0.558442	0.0571148	0.176831	Oogenic only
far-2	WBGene00001386	-0.357541	0.0570556	0.176831	Oogenic and Spermatogenic
rba-1	WBGene00004312	-0.531183	0.0573395	0.177464	Oogenic only
F42G9.1	WBGene00018362	0.381807	0.0573574	0.177464	Oogenic only
clpp-1	WBGene00014172	0.712302	0.0574623	0.177729	Oogenic and Spermatogenic
rpia-1	WBGene00015101	0.454163	0.0574964	0.177775	Oogenic and Spermatogenic
T20D3.2	WBGene00011856	0.472428	0.0575333	0.17783	Spermatogenic only
glh-1	WBGene00001598	0.311235	0.0575795	0.177914	Oogenic and Spermatogenic
F54C9.3	WBGene00010041	0.772997	0.0577351	0.178168	Oogenic and Spermatogenic
haly-1	WBGene00009813	0.424387	0.0577387	0.178168	Spermatogenic only
M106.8	WBGene00077658	-0.46067	0.0577771	0.178228	Oogenic only
egl-3	WBGene00001172	0.519818	0.0578633	0.178375	Oogenic and Spermatogenic
lst-4	WBGene00003086	-0.325978	0.0579438	0.178564	Oogenic only
ZK829.7	WBGene00014096	-0.292931	0.0580196	0.178738	Oogenic only
nhx-2	WBGene00003730	0.74958	0.058079	0.178862	Oogenic and Spermatogenic
cdc-48.2	WBGene00008053	0.303059	0.058204	0.179128	Oogenic and Spermatogenic
Y41D4A.4	WBGene00021506	0.295402	0.0582524	0.179217	Oogenic and Spermatogenic
rpn-1	WBGene00004458	0.318684	0.0584087	0.179639	Oogenic only
toca-1	WBGene00017298	-0.618898	0.0584556	0.179723	Oogenic only
tag-163	WBGene00006508	0.45964	0.0585668	0.180006	Oogenic only
dpm-1	WBGene00022044	-0.397217	0.0585865	0.180007	Oogenic only
Y48G1C.8	WBGene00021681	-0.460236	0.0587371	0.18035	Oogenic only
Y55F3BL.2	WBGene00021936	0.418301	0.0587278	0.18035	Oogenic only
lat-1	WBGene00002251	0.309352	0.0587676	0.180384	Oogenic only
F52H2.6	WBGene00018718	0.769454	0.0588726	0.180646	Oogenic and Spermatogenic
ptp-2	WBGene00004214	-0.302887	0.0589252	0.180748	Oogenic only
mut-16	WBGene00003508	0.376925	0.0591452	0.181355	Oogenic only
R107.5	WBGene00011300	-0.401086	0.0592852	0.181612	Oogenic only
pap-1	WBGene00012528	0.289759	0.0595964	0.182505	Oogenic only
polk-1	WBGene00017696	-0.535766	0.0596713	0.182614	Oogenic only
pkc-2	WBGene00004033	0.562238	0.0596639	0.182614	Oogenic and Spermatogenic
vps-20	WBGene00022027	0.434803	0.0597735	0.182867	Oogenic and Spermatogenic
eat-6	WBGene00001137	-0.299573	0.0599011	0.183197	Oogenic and Spermatogenic
ppm-1	WBGene00006460	0.319277	0.0599556	0.183243	Oogenic only
cco-2	WBGene00012553	0.390996	0.0600045	0.183332	Oogenic and Spermatogenic
K01G5.9	WBGene00010480	-0.517858	0.0600432	0.18339	Oogenic and Spermatogenic
gpd-4	WBGene00001686	-0.555971	0.0602245	0.183883	Oogenic only
gfi-1	WBGene00001581	0.606365	0.0602746	0.183915	Oogenic and Spermatogenic
nspc-14	WBGene00009638	0.804129	0.0602663	0.183915	Spermatogenic only
snx-1	WBGene00004927	-0.648819	0.0603641	0.184088	Oogenic only
Y53F4B.9	WBGene00013156	-0.29748	0.06057	0.184627	Oogenic only
F25D7.4	WBGene00009113	-0.326604	0.0607386	0.185027	Oogenic only
ain-1	WBGene00015547	-0.413	0.0608248	0.185228	Oogenic only
hrp-2	WBGene00002000	-0.343967	0.0610305	0.185733	Oogenic only
spg-7	WBGene00004978	0.465168	0.0610611	0.185765	Oogenic only
skp-1	WBGene00004806	-0.464937	0.0613015	0.186399	Oogenic only
C48E7.1	WBGene00016749	0.450364	0.0617237	0.187412	Oogenic only
mxl-3	WBGene00003511	0.734849	0.0619247	0.187855	Spermatogenic only
C34D10.2	WBGene00016407	-0.386724	0.0619303	0.187855	Oogenic and Spermatogenic
Y54F10AR.2	WBGene00021855	0.651415	0.0619891	0.187972	Oogenic only
nhr-31	WBGene00003625	0.553678	0.062518	0.189452	Oogenic and Spermatogenic
hcp-3	WBGene00001831	-0.401166	0.0629967	0.190654	Oogenic only
lys-4	WBGene00003093	-0.693661	0.0630348	0.190707	Spermatogenic only
pro-2	WBGene00007413	-0.459251	0.0631152	0.190826	Oogenic only
mut-7	WBGene00003504	0.352576	0.0631698	0.190929	Oogenic only
homt-1	WBGene00022277	0.595634	0.0633316	0.191355	Oogenic only
W09D12.1	WBGene00012364	-0.570623	0.0634146	0.19151	Spermatogenic only
cic-1	WBGene00000506	-0.589289	0.0635605	0.19186	Oogenic only
B0025.4	WBGene00015001	-0.601813	0.0635869	0.191877	Oogenic only
C36E6.1	WBGene00016489	-0.573468	0.0636696	0.192002	Oogenic and Spermatogenic
F33H2.6	WBGene00009369	0.451945	0.063786	0.192169	Oogenic only
F49E8.7	WBGene00018638	0.471741	0.064175	0.193087	Oogenic only
F59A3.4	WBGene00019077	0.43297	0.0643153	0.193446	Oogenic and Spermatogenic
ugtp-1	WBGene00022721	0.453619	0.0647365	0.194587	Oogenic only
Y73B3A.1	WBGene00022203	0.527681	0.0648714	0.194929	Oogenic only
atg-13	WBGene00017045	-0.558137	0.0652011	0.195666	Oogenic only
ncx-1	WBGene00003566	0.495114	0.0652265	0.195679	Oogenic only
lem-2	WBGene00002275	-0.367058	0.0652717	0.195752	Oogenic only
tag-174	WBGene00006519	0.406422	0.0655133	0.196286	Oogenic and Spermatogenic
trap-1	WBGene00022122	0.30579	0.0656005	0.196484	Oogenic and Spermatogenic
F32A11.1	WBGene00009307	0.367324	0.0658921	0.197109	Oogenic and Spermatogenic
nduf-2.2	WBGene00006463	0.479005	0.0660288	0.197373	Oogenic and Spermatogenic
gop-1	WBGene00001660	0.422071	0.0660505	0.197373	Oogenic only
F20A1.10	WBGene00017621	-0.492992	0.066161	0.197589	Spermatogenic only
har-2	WBGene00011988	-0.613926	0.0662042	0.197654	Oogenic only
rpl-35	WBGene00004449	0.361949	0.0662929	0.197792	Oogenic and Spermatogenic
rabn-5	WBGene00017161	0.340583	0.0663775	0.197981	Oogenic only
goa-1	WBGene00001648	-0.291962	0.066776	0.199013	Oogenic and Spermatogenic
gcst-1	WBGene00017765	0.490951	0.0671735	0.199969	Oogenic and Spermatogenic
mua-6	WBGene00003485	0.429339	0.0672664	0.200182	Spermatogenic only
B0303.4	WBGene00015126	0.415344	0.0674979	0.200806	Oogenic only
K07B1.4	WBGene00019464	-0.504223	0.0675617	0.200932	Oogenic only
cah-4	WBGene00000282	-0.379079	0.0676107	0.201013	Oogenic and Spermatogenic
nhr-48	WBGene00003638	-0.611797	0.0676689	0.201122	Oogenic only
hut-1	WBGene00013740	-0.396171	0.0679423	0.201805	Oogenic only
nprl-2	WBGene00018635	0.394674	0.0679756	0.201839	Oogenic only
nol-9	WBGene00010709	-0.487868	0.0685448	0.203334	Oogenic only
nuc-1	WBGene00003828	-0.69225	0.0685765	0.203363	Spermatogenic only
ced-4	WBGene00000418	0.312244	0.0687626	0.203834	Oogenic only
C34B2.5	WBGene00016390	0.700927	0.0688343	0.203834	Oogenic and Spermatogenic
rps-0	WBGene00004469	0.307637	0.068786	0.203834	Oogenic and Spermatogenic
ubc-13	WBGene00006708	-0.341578	0.0689576	0.203935	Oogenic and Spermatogenic
hsp-25	WBGene00002023	0.378783	0.0689214	0.203935	Oogenic only
Y37E3.1	WBGene00021346	-0.725034	0.0689486	0.203935	Oogenic and Spermatogenic
Y15E3A.4	WBGene00012443	0.609421	0.0689889	0.203935	Oogenic and Spermatogenic
his-72	WBGene00001946	-0.278372	0.069198	0.204423	Oogenic only
pyp-1	WBGene00008149	0.345317	0.0695845	0.205434	Oogenic only
mlc-5	WBGene00011734	-0.474635	0.0696462	0.205485	Oogenic only
F59H5.1	WBGene00019130	-0.661104	0.0698218	0.205872	Oogenic only
F07A11.4	WBGene00008547	0.77963	0.0700161	0.206314	Spermatogenic only
cec-9	WBGene00016236	0.368	0.0701005	0.206497	Oogenic only
dnj-29	WBGene00001047	0.321241	0.0701724	0.206643	Oogenic only
clh-6	WBGene00000533	-0.545081	0.0702245	0.206666	Oogenic only
afd-1	WBGene00021009	-0.436554	0.0702906	0.206795	Oogenic only
stl-1	WBGene00006061	-0.559161	0.070416	0.206967	Oogenic only
toe-2	WBGene00016971	0.327017	0.0704139	0.206967	Oogenic only
ZC513.5	WBGene00022629	-0.412871	0.0704409	0.206975	Oogenic only
T20G5.9	WBGene00011871	-0.406413	0.0708267	0.207977	Oogenic only
F01F1.15	WBGene00017169	0.445498	0.0708659	0.208026	Oogenic only
chd-7	WBGene00007053	-0.410216	0.0709873	0.20825	Oogenic only
inx-1	WBGene00002123	0.63321	0.0713033	0.208847	Spermatogenic only
F57A8.1	WBGene00010177	0.554272	0.0714449	0.209196	Oogenic only
T04F8.8	WBGene00011446	0.374983	0.0714785	0.209229	Spermatogenic only
asp-13	WBGene00017881	0.431567	0.0716654	0.209659	Spermatogenic only
T24B8.4	WBGene00011978	0.539958	0.0716708	0.209659	Oogenic and Spermatogenic
T10B11.8	WBGene00020404	-0.434938	0.0717353	0.209782	Oogenic only
M4.1	WBGene00019766	-0.416698	0.0717697	0.209811	Oogenic only
enpl-1	WBGene00011480	0.301969	0.0717905	0.209811	Oogenic and Spermatogenic
ntl-3	WBGene00003826	-0.332547	0.0721329	0.210679	Oogenic only
F29B9.1	WBGene00017919	-0.481855	0.0727197	0.212259	Oogenic only
gei-15	WBGene00001572	0.736139	0.072778	0.212363	Spermatogenic only
prdx-3	WBGene00011110	0.422445	0.0729277	0.212733	Oogenic and Spermatogenic
ttr-18	WBGene00007142	0.459585	0.0730232	0.212811	Spermatogenic only
unc-112	WBGene00006836	0.382413	0.0729846	0.212811	Oogenic and Spermatogenic
nfx-1	WBGene00007048	-0.368497	0.0730201	0.212811	Oogenic only
F57F4.4	WBGene00019017	0.351581	0.0732301	0.213308	Oogenic and Spermatogenic
tba-4	WBGene00006530	0.708002	0.0732399	0.213308	Oogenic and Spermatogenic
dnj-8	WBGene00001026	-0.416102	0.07333	0.213503	Oogenic only
set-9	WBGene00017482	0.295941	0.0733981	0.213608	Oogenic only
F13E9.1	WBGene00008750	0.39621	0.0734118	0.213608	Oogenic only
T01D1.4	WBGene00020149	0.705984	0.0735227	0.213809	Spermatogenic only
pbs-2	WBGene00003948	-0.357798	0.073527	0.213809	Oogenic and Spermatogenic
H14E04.2	WBGene00019199	0.341242	0.0736582	0.214113	Oogenic only
ZK1307.9	WBGene00014250	-0.690619	0.0737777	0.214295	Oogenic only
acdh-1	WBGene00016943	-0.333752	0.0739844	0.214668	Spermatogenic only
cyk-4	WBGene00000875	0.329728	0.0739644	0.214668	Oogenic and Spermatogenic
agef-1	WBGene00012386	0.343883	0.0739472	0.214668	Oogenic only
F32D1.5	WBGene00017984	-0.351899	0.0742837	0.215469	Oogenic and Spermatogenic
[truncated: 4,112 more rows]
